# Supplementary material for: Palladium-catalyzed asymmetric [3+2] cycloaddition to construct 1,3-indandione and oxindole-fused spiropyrazolidine scaffolds
Source: Royal Society of Chemistry journal article supplement (doi:10.1039/c5ra19838k), 2015-01-01
Supplement: c5ra19838k1.pdf [file c5ra19838k1.pdf]

## Supporting Information

### Palladium-Catalyzed Asymmetric [3+2] Cycloaddition to Construct 1,3-Indandione and Oxindole-Fused Spiropyrazolidine Scaffolds

*Bo Cao,<sup>a</sup> Liang-Yong Mei,<sup>b</sup> Xiao-Ge Li,<sup>c</sup> and Min Shi<sup>ab\*</sup>*

<sup>a</sup>Key Laboratory for Advanced Materials and Institute of Fine Chemicals, School of Chemistry & Molecular Engineering, East China University of Science and Technology, 130 Mei Long Road, Shanghai 200237, China.

<sup>b</sup>State Key Laboratory of Organometallic Chemistry, Shanghai Institute of Organic Chemistry, Chinese Academy of Sciences, 354 Fenglin Road, Shanghai 200032 China.

*Mshi@mail.sioc.ac.cn*. Fax 86-21-64166128

<sup>c</sup>Shanghai Institute of Organic Chemistry, Chinese Academy of Sciences, 354 Fenglin Lu, Shanghai 200032, China. [lixiaoge@sioc.ac.cn](mailto:lixiaoge@sioc.ac.cn)

## CONTENTS

|                                                                                              |         |
|----------------------------------------------------------------------------------------------|---------|
| 1. General remarks.....                                                                      | S2      |
| 2. General procedure for synthesis of cyclopropane <b>1</b> .....                            | S3      |
| 3. General procedure for synthesis of 3-diazooxindoles <b>2</b> .....                        | S3-S4   |
| 4. Characterization and spectra charts for ligand <b>L</b> .....                             | S4-S11  |
| 5. Screening of ligands for the [3+2] cycloaddition.....                                     | S12-S14 |
| 6. General procedure for synthesis of spiropyrazolidine derivatives <b>3</b> .....           | S14-S15 |
| 7. Characterization and spectra charts containing HPLC traces for <b>3</b> .....             | S15-S63 |
| 8. Procedure for synthesis of <b>5</b> and its characterization and spectra charts.....      | S63-S67 |
| 9. X-ray crystallographic information of products <b>5</b> .....                             | S68     |
| 10. Experimental and results: Vibrational Circular Dichroism (VCD) of Product <b>5</b> ..... | S68-S71 |
| 11. References.....                                                                          | S72     |

**1. General remarks.** MP was obtained with a Yanagimoto micro melting point apparatus and is uncorrected. Optical rotations were determined in a solution of CHCl<sub>3</sub> or CH<sub>2</sub>Cl<sub>2</sub> at 20 °C by using a Perkin-Elmer-241 MC polarimeter; [ $\alpha$ ]<sub>D</sub>-values are given in units of 10<sup>-1</sup> deg cm<sup>2</sup> g<sup>-1</sup>. Infra-red spectra were measured on a spectrometer. <sup>1</sup>H NMR spectra were recorded for solution in CDCl<sub>3</sub> with tetramethylsilane (TMS) as internal standard; <sup>31</sup>P NMR spectra were recorded for a solution in CDCl<sub>3</sub> with 85% H<sub>3</sub>PO<sub>4</sub> as the external reference. *J*-values are in Hz. Mass spectra were recorded with a HP-5989 instrument and HRMS was measured by a Finnigan MA+ mass spectrometer. Organic solvents used were dried by standard methods when necessary. Commercially available reagents were used without further purification. All reactions were monitored by TLC with Huanghai GF<sub>254</sub> silica gel coated plates. Flash column chromatography was carried out using 300-400 mesh silica gel at increased pressure. All reactions were performed under argon using standard Schlenk techniques. The optical purities of products were determined by HPLC analysis using a SHIMADZU SPD-10A *vp* series with chiral columns (Chiralpak IB-3 and IF-3 columns 4.6 x 250 mm, (Daicel Chemical Ind., Ltd.)).

Ligands **L1-L5**, **L8**, **L11-L15**<sup>[1]</sup> were prepared according to the previously reported procedures.

2-Vinylspiro[cyclopropane-1,2'-indene]-1',3'-dione **1**,<sup>[2]</sup> was prepared according to the previously reported procedures.

3-Diazooxindoles **2** were prepared according to the previously reported procedures.<sup>[3]</sup>

## 2. General procedure for the synthesis of 2-vinylspiro[cyclopropane-1,2'-indene]-1',3'-dione **1**

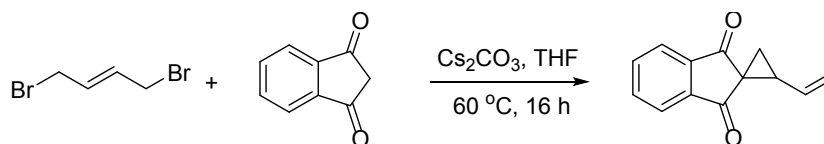

1*H*-indene-1,3(2*H*)-dione (1.0 equiv) and 1,4-dibromobut-2-ene (1.0 equiv) were added to a round bottom flask with a magnetic stir bar under an atmosphere of argon. To this was added tetrahydrofuran (0.2 mL) and cesium carbonate (2.5 equiv). A condenser was added, and reaction mixture was then heated to 60 °C over night. After cooling down to room temperature, the reaction mixture was filtered through a celite and washed with diethyl ether. The organic phase was washed with saturated aqueous NaHCO<sub>3</sub>, followed by water and brine. The solution was dried over anhydrous Na<sub>2</sub>SO<sub>4</sub>. After filtration over Na<sub>2</sub>SO<sub>4</sub>, the solvent is removed under reduced pressure. The crude product is purified by means of silica gel chromatography using petroleum ether and diethylether as an eluent. The yields have not been optimized for the synthesis of 2-vinylspiro[cyclopropane-1,2'-indene]-1',3'-dione.

## 3. General procedure for the synthesis of 3-diazooxindoles **2**

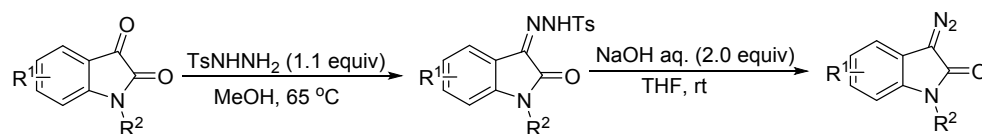

Isatin (5.0 mmol, 1.0 equiv) was suspended in MeOH (20 mL). The suspension was heated to 60 °C, whereupon a deep-red solution was obtained. To this hot solution was added tosylhydrazine (5.5 mmol, 1.1 equiv) in one portion. A yellow product started precipitating from the hot mixture. The reaction mixture was stirred at 60 °C for 18 h, and then allowed to reach room temperature. The corresponding tosylhydrazone was collected by filtration and was used for the next step without further purification.

A solution of the tosylhydrazone (5.0 mmol, 1.0 equiv) in THF (20 mL) was treated with a solution of NaOH (10.0 mmol, 2.0 equiv) in H<sub>2</sub>O (50 mL). The reaction mixture was stirred for 3 h at room temperature. EtOAc (40 mL) was added to the reaction mixture and the organic layers were separated. The aqueous layer was adjusted to pH = 7 by addition of dry-ice, and extracted with EtOAc (60 mL). The combined organic layers were dried over Na<sub>2</sub>SO<sub>4</sub>, filtered, and the solvent was evaporated in vacuo. Column chromatography (1:6 EtOAc/PE) afforded **2** as deep-orange solids.

#### 4. Characterization and spectra charts for ligand.

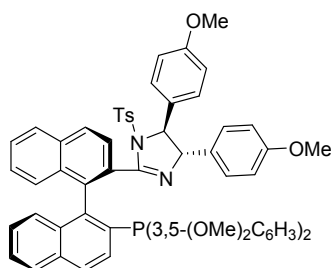

#### **(4S,5S)-2-((R)-1-(2-(bis(3,5-dimethoxyphenyl)phosphino)naphthalen-1-yl)naphthalen-2-yl)-1-tosyl-4,5-bis(4-methoxyphenyl)-4,5-dihydro-1H-imidazole L6**

0.5 mmol scale, a white solid, 11% yield for three steps (86 mg). M.p.: 128-130 °C. <sup>1</sup>H NMR (CDCl<sub>3</sub>, TMS, 400 MHz) δ 2.28 (s, 3H, CH<sub>3</sub>), 3.41 (s, 6H, CH<sub>3</sub>), 3.48 (s, 6H, CH<sub>3</sub>), 3.71 (s, 3H, CH<sub>3</sub>), 3.76 (s, 3H, CH<sub>3</sub>), 4.36 (d, *J* = 6.0 Hz, 1H, CH), 4.52 (d, *J* = 6.0 Hz, 1H, CH), 5.70 (d, *J* = 8.4 Hz, 2H, ArH), 6.00 (dd, *J* = 2.4 Hz, 8.8 Hz, 2H, ArH), 6.19 (dd, *J* = 2.0 Hz, 2.0 Hz, 1H, ArH), 6.24-6.25 (m, 1H, ArH), 6.34-6.38 (m, 4H, ArH), 6.61 (d, *J* = 8.4 Hz, 1H, ArH), 6.69-6.80 (m, 5H, ArH), 6.94 (d, *J* = 8.0 Hz, 2H, ArH), 7.16 (d, *J* = 8.4 Hz, 2H, ArH), 7.28-7.34 (m, 2H, ArH), 7.50-7.59 (m, 2H, ArH), 7.81 (d, *J* = 8.4 Hz, 1H, ArH), 7.89 (d, *J* = 8.4 Hz, 1H, ArH), 7.95-8.02 (m, 2H, ArH), 8.05 (d, *J* = 8.8 Hz, 1H, ArH), 8.15 (d, *J* = 8.4 Hz, 1H, ArH). <sup>31</sup>P NMR (CDCl<sub>3</sub>, 161 MHz, 85% H<sub>3</sub>PO<sub>4</sub>) δ -9.31. IR (CH<sub>2</sub>Cl<sub>2</sub>) ν 3062, 2960, 2932, 2834, 1642, 1584, 1511, 1460, 1411, 1280, 1247, 1203, 1155, 1087, 1036, 816, 689, 665 cm<sup>-1</sup>. MS (MALDI) *m/z* (%): 993.2 (100) [M+H]<sup>+</sup>; HRMS (MALDI) Calcd. for C<sub>60</sub>H<sub>54</sub>N<sub>2</sub>O<sub>8</sub>PS<sup>+</sup>(M+H)<sup>+</sup> requires 993.3333, Found: 993.3327. [α]<sub>D</sub><sup>20</sup> = +17.27 (c = 1.00, CH<sub>2</sub>Cl<sub>2</sub>).

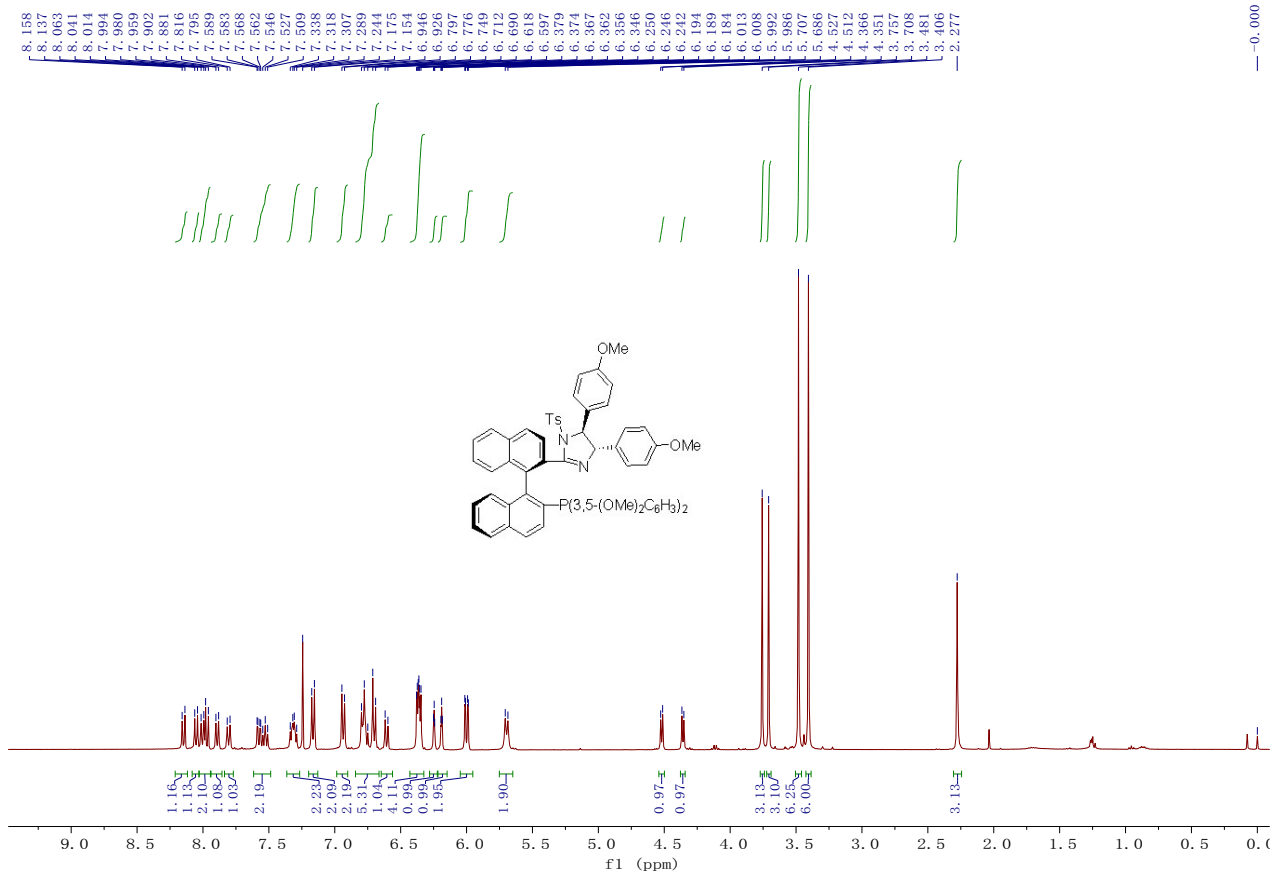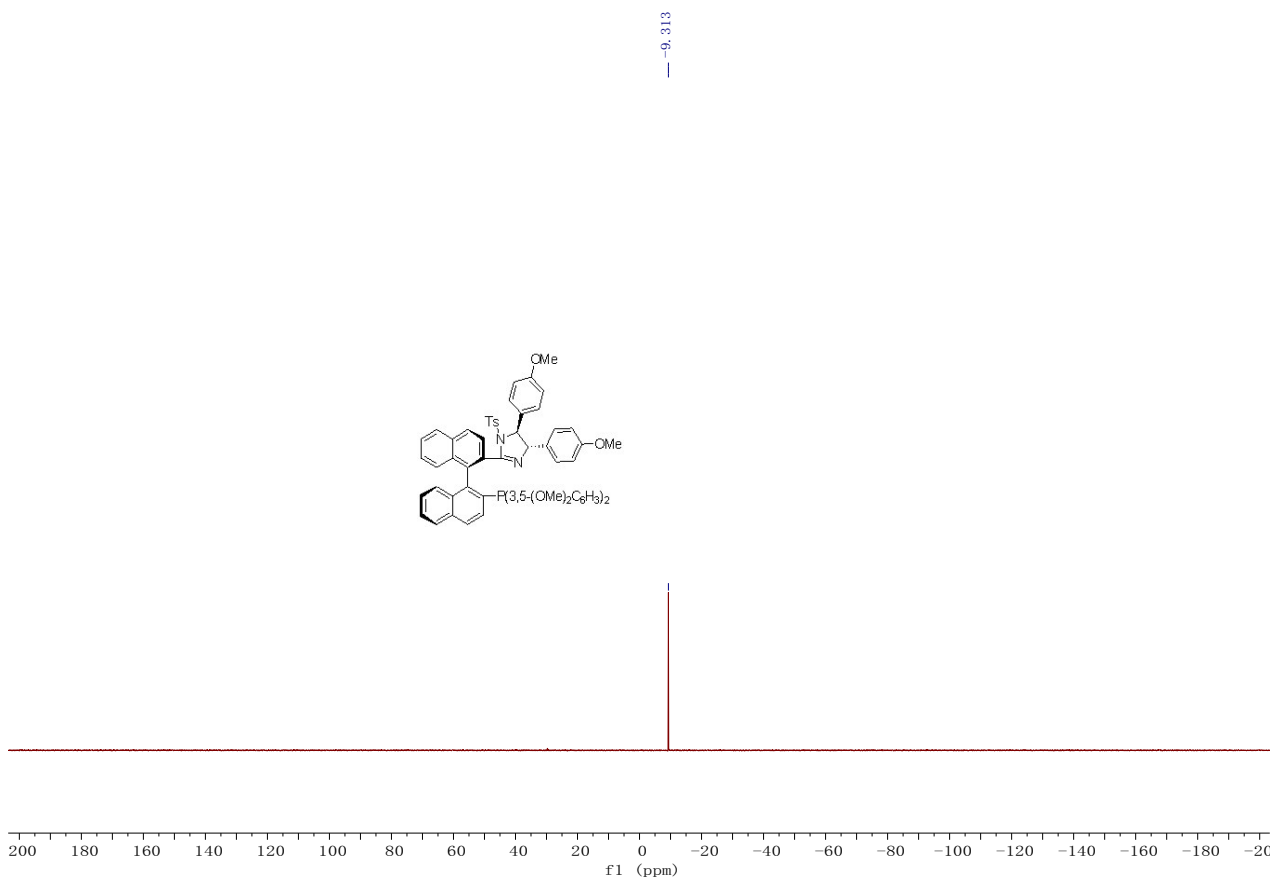

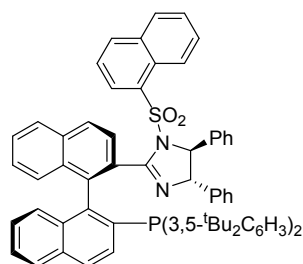

**(4S,5S)-2-((R)-1-(2-(bis(3,5-di-tert-butylphenyl)phosphino)naphthalen-1-yl)naphthalen-2-yl)-1-(naphthalen-1-ylsulfonyl)-4,5-diphenyl-4,5-dihydro-1H-imidazole L7**

0.5 mmol scale, a white solid, 9% yield for three steps (65 mg). M.p.: 154-156 °C. <sup>1</sup>H NMR (CDCl<sub>3</sub>, TMS, 400 MHz) δ 0.99 (s, 18H, C(CH<sub>3</sub>)<sub>3</sub>), 1.06 (s, 18H, C(CH<sub>3</sub>)<sub>3</sub>), 4.56 (br, 1H, CH), 4.64 (d, *J* = 5.6 Hz, 1H, CH), 5.80 (br, 2H, ArH), 6.41 (d, *J* = 8.4 Hz, 1H, ArH), 6.53 (dd, *J* = 7.2 Hz, 7.2 Hz, 1H, ArH), 6.68 (dd, *J* = 1.2 Hz, 8.4 Hz, 2H, ArH), 6.74 (dd, *J* = 7.2 Hz, 7.2 Hz, 2H, ArH), 6.80-6.83 (m, 2H, ArH), 6.89 (dd, *J* = 7.6 Hz, 7.6 Hz, 1H, ArH), 6.99 (d, *J* = 7.2 Hz, 2H, ArH), 7.10-7.25 (m, 9H, ArH), 7.39 (dd, *J* = 7.6 Hz, 7.6 Hz, 1H, ArH), 7.48-7.55 (m, 2H, ArH), 7.62 (d, *J* = 8.4 Hz, 1H, ArH), 7.69 (d, *J* = 8.0 Hz, 1H, ArH), 7.79 (d, *J* = 8.0 Hz, 1H, ArH), 7.86 (d, *J* = 8.0 Hz, 1H, ArH), 7.92-8.01 (m, 4H, ArH), 8.07 (d, *J* = 8.4 Hz, 1H, ArH), 8.13 (d, *J* = 8.4 Hz, 1H, ArH). <sup>31</sup>P NMR (CDCl<sub>3</sub>, 161 MHz, 85% H<sub>3</sub>PO<sub>4</sub>) δ -11.29. IR (CH<sub>2</sub>Cl<sub>2</sub>) ν 3061, 2961, 2867, 1644, 1589, 1476, 1362, 1337, 1248, 1134, 1165, 1024, 818, 770, 747, 697, 680 cm<sup>-1</sup>. HRMS (ESI) Calcd. for C<sub>73</sub>H<sub>74</sub>N<sub>2</sub>O<sub>2</sub>PS<sup>+</sup>(M+H)<sup>+</sup> requires 1073.5203, Found: 1073.5198. [α]<sub>D</sub><sup>20</sup> = -4.72 (c = 1.00, CH<sub>2</sub>Cl<sub>2</sub>).

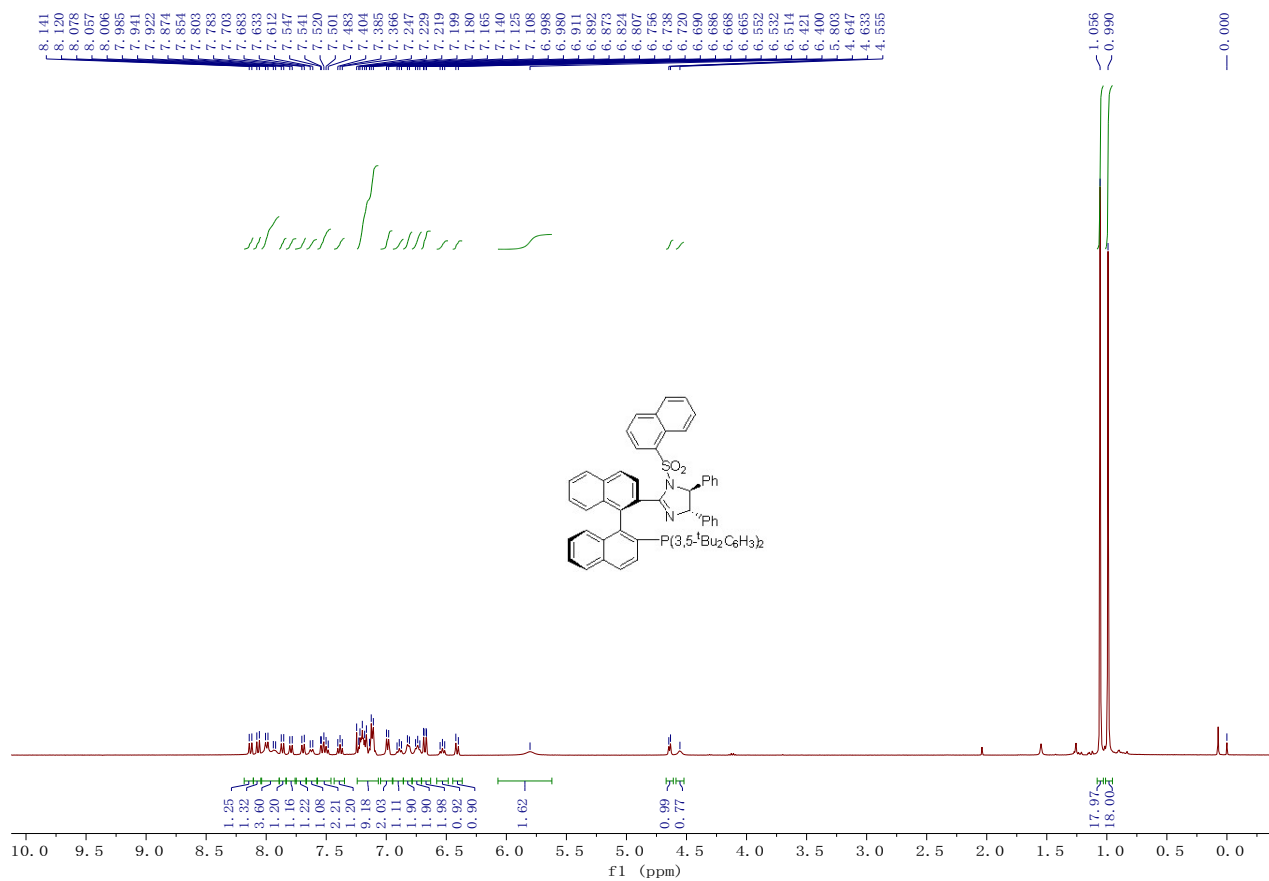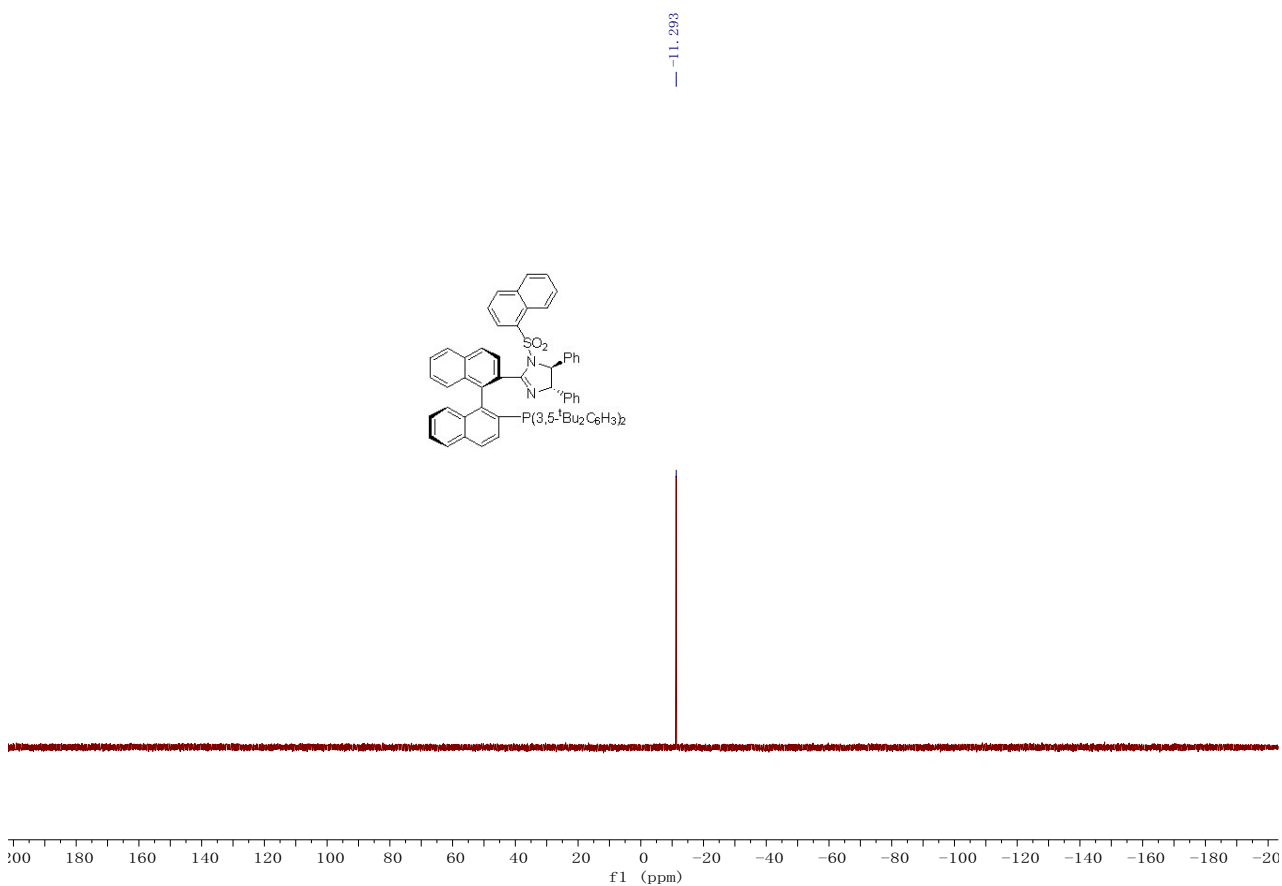

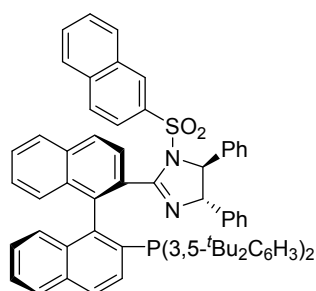

**(4S,5S)-2-((R)-1-(2-(bis(3,5-di-tert-butylphenyl)phosphino)naphthalen-1-yl)naphthalen-2-yl)-1-(naphthalen-2-ylsulfonyl)-4,5-diphenyl-4,5-dihydro-1H-imidazole L9**

0.5 mmol scale, a white solid, 7% yield for three steps (30 mg). M.p.: 150-153 °C. <sup>1</sup>H NMR (CDCl<sub>3</sub>, TMS, 400 MHz) δ 1.00 (s, 18H, C(CH<sub>3</sub>)<sub>3</sub>), 1.05 (s, 18H, C(CH<sub>3</sub>)<sub>3</sub>), 4.51 (d, *J* = 5.6 Hz, 1H, CH), 4.71 (d, *J* = 5.6 Hz, 1H, CH), 5.73 (d, *J* = 6.8 Hz, 2H, ArH), 6.43 (d, *J* = 8.8 Hz, 1H, ArH), 6.57 (dd, *J* = 6.8 Hz, 6.8 Hz, 1H, ArH), 6.62-6.70 (m, 4H, ArH), 6.79 (dd, *J* = 7.6 Hz, 7.6 Hz, 1H, ArH), 6.89 (d, *J* = 7.2 Hz, 2H, ArH), 6.94 (dd, *J* = 0.8 Hz, 7.6 Hz, 2H, ArH), 7.02-7.11 (m, 5H, ArH), 7.16-7.23 (m, 2H, ArH), 7.27-7.32 (m, 1H, ArH), 7.45-7.62 (m, 6H, ArH), 7.71 (d, *J* = 8.0 Hz, 1H, ArH), 7.79-7.85 (m, 3H, ArH), 8.04-8.17 (m, 4H, ArH). <sup>31</sup>P NMR (CDCl<sub>3</sub>, 161 MHz, 85% H<sub>3</sub>PO<sub>4</sub>) δ -11.44. IR (CH<sub>2</sub>Cl<sub>2</sub>) ν 3060, 2961, 2926, 2858, 1644, 1588, 1456, 1476, 1362, 1341, 1362, 1341, 1261, 1249, 1167, 1073, 1020, 874, 817, 746, 697, 666 cm<sup>-1</sup>. HRMS (ESI) Calcd. for C<sub>73</sub>H<sub>74</sub>N<sub>2</sub>O<sub>2</sub>PS<sup>+</sup>(M+H)<sup>+</sup> requires 1073.5203, Found: 1073.5201. [α]<sub>D</sub><sup>20</sup> = -36.24 (c = 1.00, CH<sub>2</sub>Cl<sub>2</sub>).



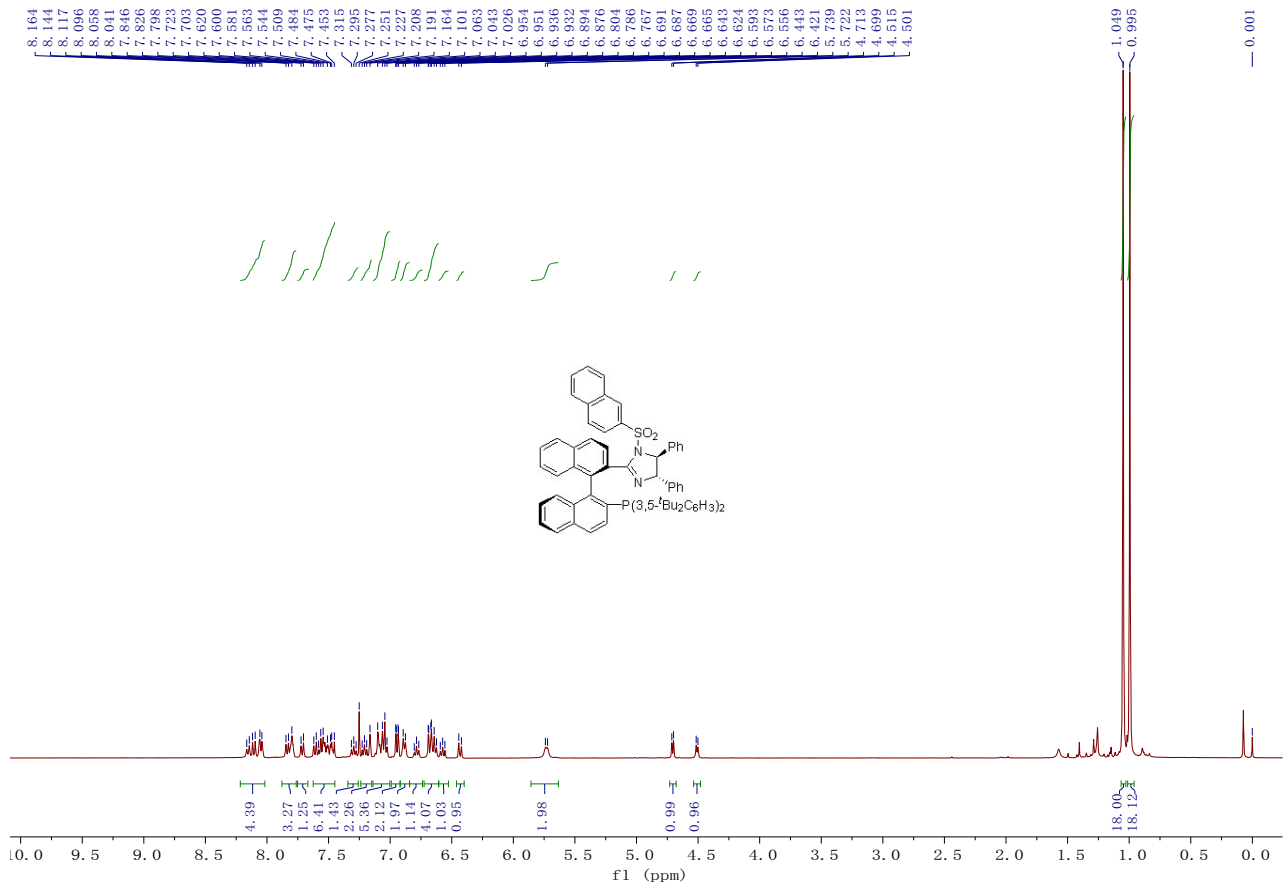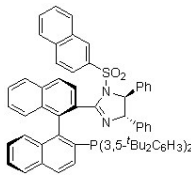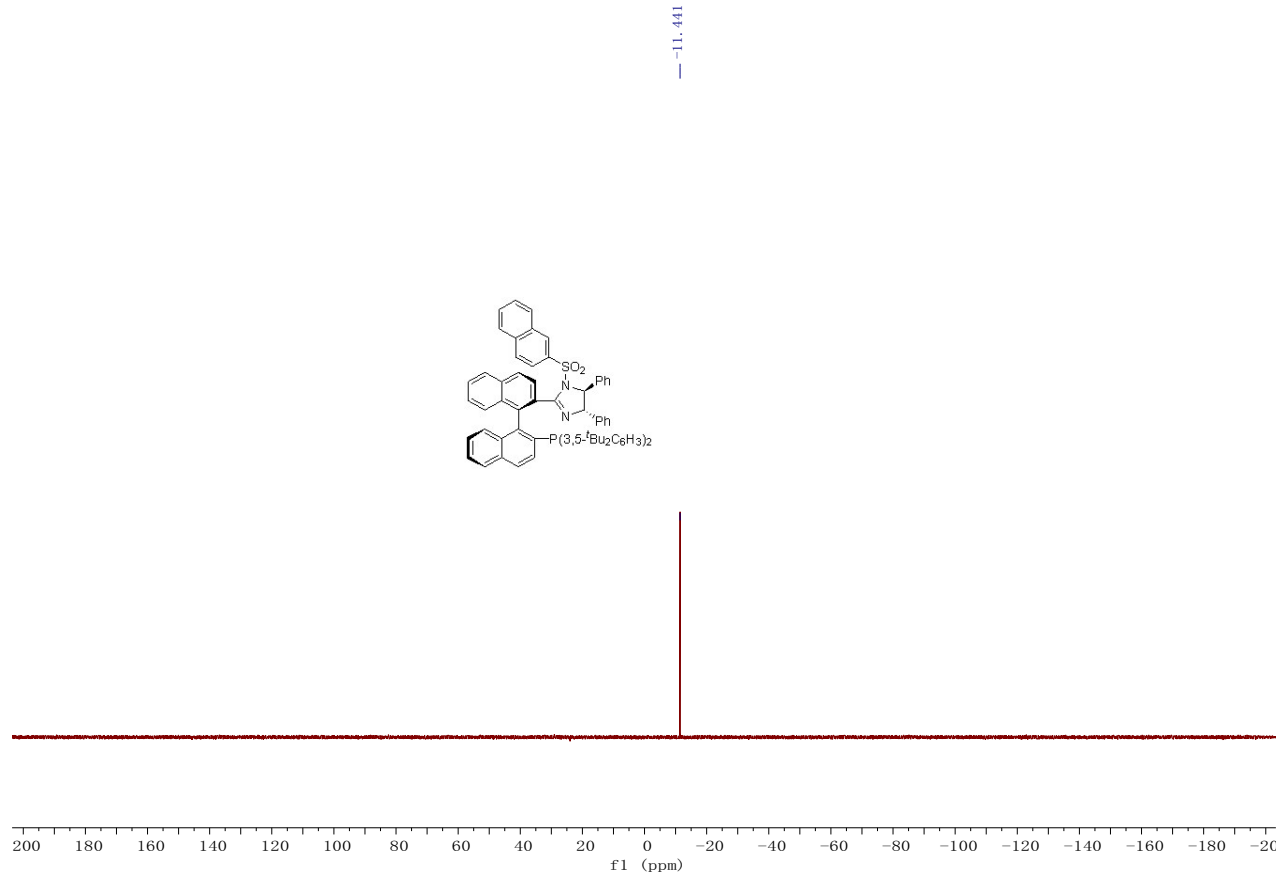

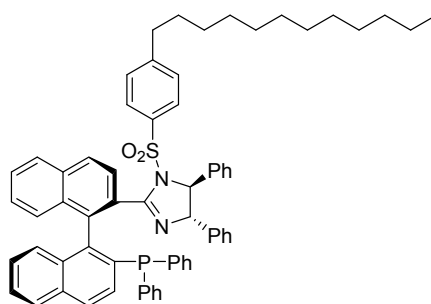

**(4S,5S)-2-((R)-1-(2-(diphenyl)phosphino)naphthalen-1-yl)naphthalen-2-yl)-1-(4-dodecylphenyl)sulfonyl)-4,5-diphenyl-4,5-dihydro-1H-imidazole L10**

0.5 mmol scale, a white solid, 30% yield for three steps (181 mg). M.p.: 92-95 °C. <sup>1</sup>H NMR (CDCl<sub>3</sub>, TMS, 400 MHz) δ 0.79-1.57 (m, 25H, CH<sub>2</sub>, CH<sub>3</sub>), 4.43 (d, *J* = 6.0 Hz, 1H, CH), 4.59 (d, *J* = 6.0 Hz, 1H, CH), 5.83 (d, *J* = 8.0 Hz, 2H, ArH), 6.69 (d, *J* = 8.4 Hz, 1H, ArH), 6.77-6.92 (m, 7H, ArH), 6.97-7.01 (m, 7H, ArH), 7.07-7.17 (m, 5H, ArH), 7.22-7.25 (m, 3H, ArH), 7.29-7.39 (m, 3H, ArH), 7.52-7.58 (m, 2H, ArH), 7.81 (d, *J* = 8.4 Hz, 1H, ArH), 7.91 (d, *J* = 8.0 Hz, 1H, ArH), 7.96-8.04 (m, 3H, ArH), 8.14 (d, *J* = 8.8 Hz, 1H, ArH). <sup>31</sup>P NMR (CDCl<sub>3</sub>, 161 MHz, 85% H<sub>3</sub>PO<sub>4</sub>) δ -14.32. IR (CH<sub>2</sub>Cl<sub>2</sub>) ν 3056, 2955, 2926, 2854, 1643, 1595, 1494, 1455, 1434, 1373, 1341, 1167, 1089, 1026, 958, 817, 775, 742, 696, 676 cm<sup>-1</sup>. HRMS (ESI) Calcd. for C<sub>65</sub>H<sub>64</sub>N<sub>2</sub>O<sub>2</sub>PS<sup>+1</sup>(M+H)<sup>+</sup> requires 967.4421, Found:967.4416. [α]<sub>D</sub><sup>20</sup> = +14.84 (c = 1.00, CH<sub>2</sub>Cl<sub>2</sub>).

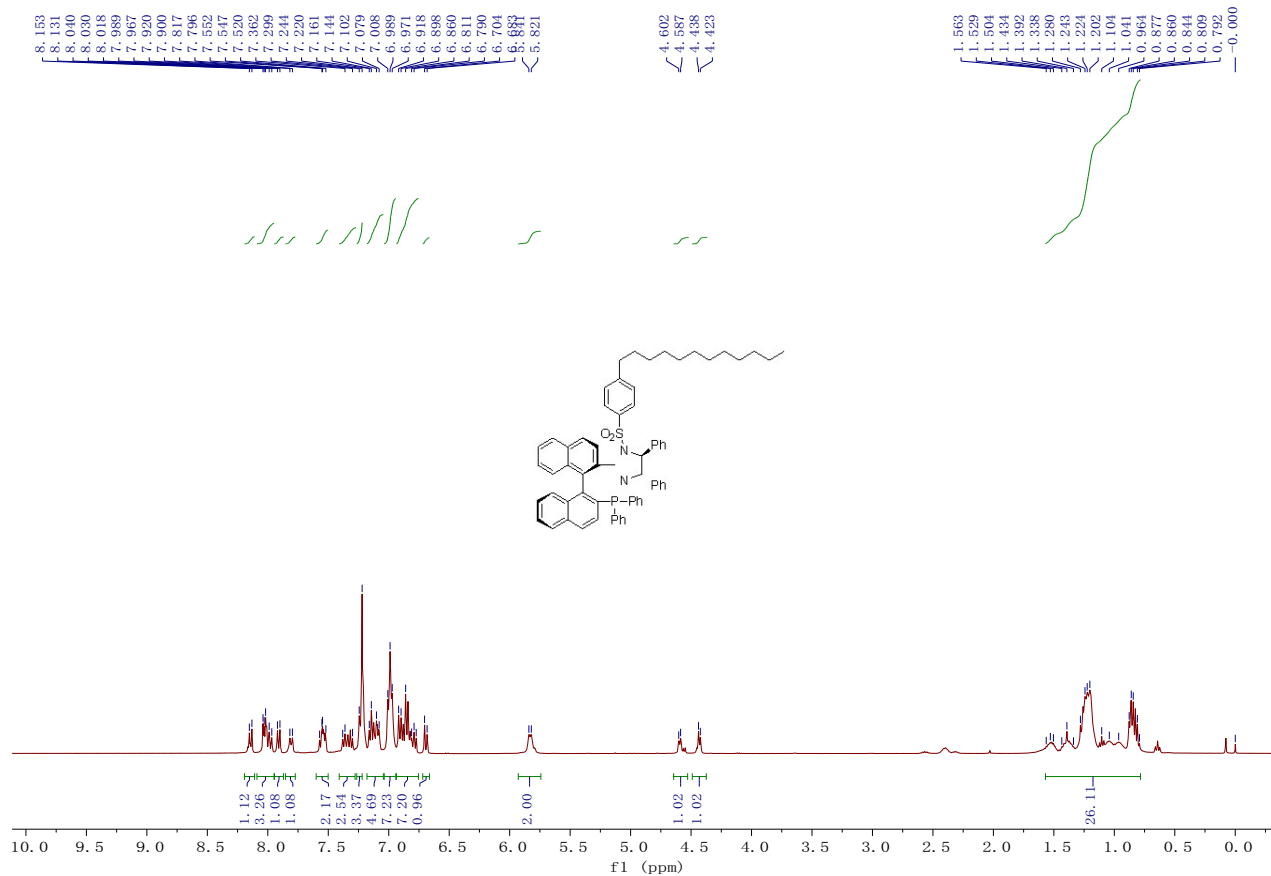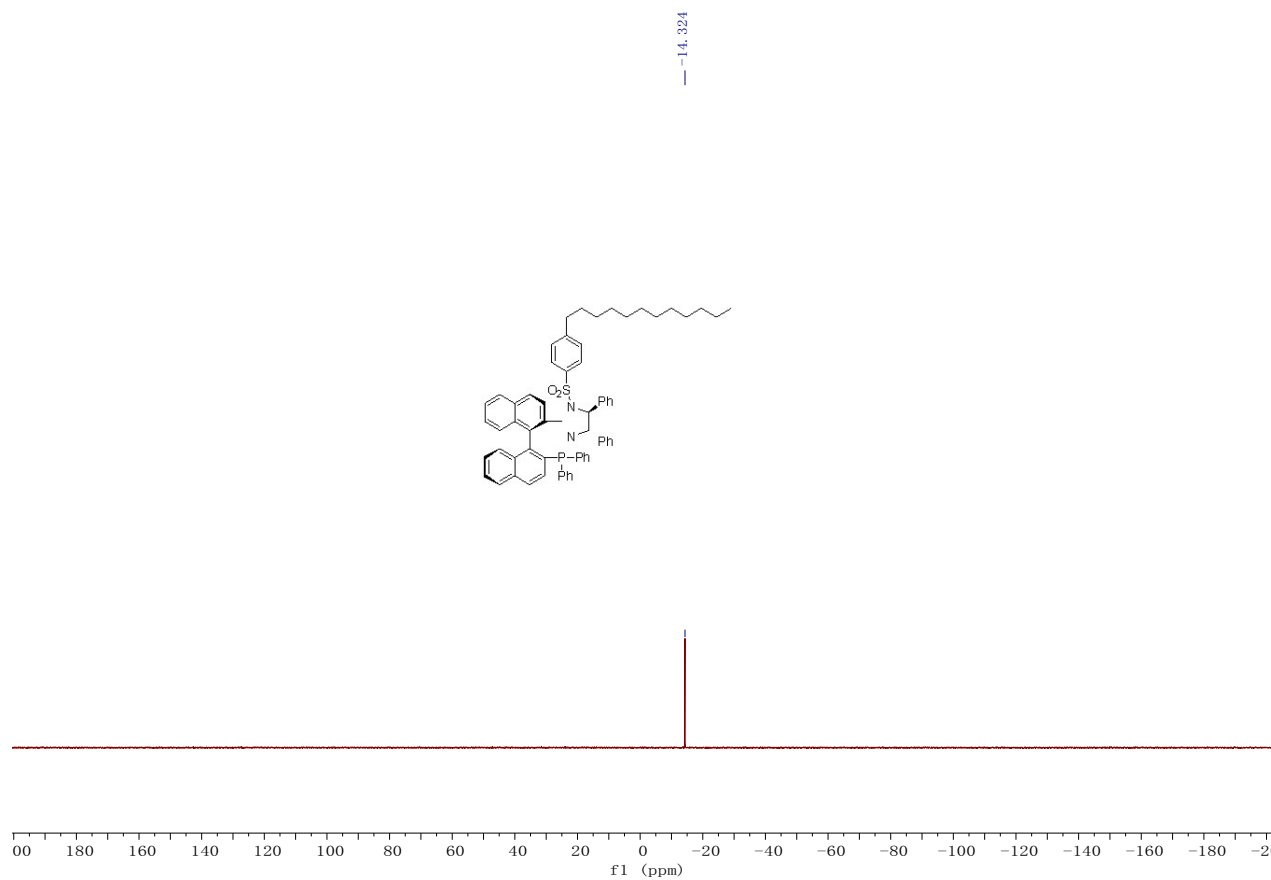

## 5. Screening of ligands for palladium-catalyzed asymmetric formal [3+2]-cycloaddition

We began our investigation by exploring our previously developed catalytic system for palladium(0)-catalyzed asymmetric [3+2] cycloaddition using 3-diazoindoles serving as dipolarophiles. 2-vinylspiro[cyclopropane-1,2'-indene]-1',3'-dione **1** and 1-benzyl-3-diazoindolin-2-one **2a** were used as the model substrates, toluene was employed as solvent in the presence of ligands **L1-L15** at 0 °C. The use of chiral imidazoline-phosphine type ligand (*aR,S,S*)-**L1** in the reaction furnished the desired product **3a** in 88% yield along with 48% ee (Table SI-1, entry 1), while employing ligand (*aR,R,R*)-**L2** provided the product **3a** in 47% yield with 19% ee value (Table SI-1, entry 2). Another four newly synthesized chiral imidazoline-phosphine ligands **L6**, **L7**, **L9**, and **L10** as well as **L2-L5** and **L8** were also used to screen the optimal ligand for this reaction. It was found that using **1** and **2a** as model substrates in toluene at 0 °C, chiral imidazoline-phosphine (*aR,S,S*)-**L8** was identified as the best ligand for this reaction, resulting in **3a** in 95% yield and 78% ee (Table SI-1, entry 8). For comparison, we also examined the chiral phosphine-oxazoline ligands (*aS,S*)-**L11** and (*aR,S*)-**L12** in this reaction under identical conditions. However, the use of ligand **L12** gave no desired product **3a** (Table SI-1, entry 12), while the use of ligand **L11** resulted in the formation of **3a** in 88% yield but only along with 15% ee (Table SI-1, entry 11). Other ligands, such as **L13**, **L14** or **L15**, did not give the desired product **3a** (Table SI-1, entries 13-15).

**Table SI-1.** Screening of Ligands for Pd-Catalyzed [3+2] Cycloaddition

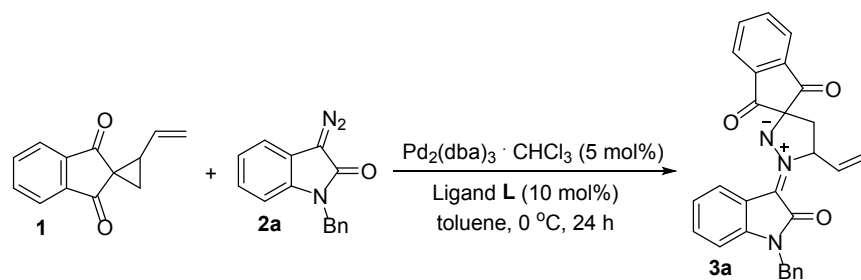

| entry <sup>[a]</sup> | Ligand     | yield [%] <sup>[b]</sup> | ee [%] <sup>[c]</sup> |
|----------------------|------------|--------------------------|-----------------------|
| 1                    | <b>L1</b>  | 88                       | 48                    |
| 2                    | <b>L2</b>  | 47                       | 19                    |
| 3                    | <b>L3</b>  | 97                       | 70                    |
| 4                    | <b>L4</b>  | 84                       | 50                    |
| 5                    | <b>L5</b>  | 92                       | 60                    |
| 6                    | <b>L6</b>  | 98                       | 71                    |
| 7                    | <b>L7</b>  | 96                       | 61                    |
| 8                    | <b>L8</b>  | 95                       | 78                    |
| 9                    | <b>L9</b>  | 96                       | 67                    |
| 10                   | <b>L10</b> | 93                       | 26                    |
| 11                   | <b>L11</b> | 88                       | 15                    |
| 12                   | <b>L12</b> | trace                    | n. d.                 |
| 13                   | <b>L13</b> | trace                    | n. d.                 |
| 14                   | <b>L14</b> | trace                    | n. d.                 |
| 15                   | <b>L15</b> | trace                    | n. d.                 |

<sup>a)</sup> The reaction was conducted with **1** (0.1 mmol) and **2a** (0.15 mmol) in toluene (0.75 mL).

<sup>b)</sup> Isolated yield. <sup>c)</sup> The ee values were determined by chiral HPLC on Chiralcel IB-3.

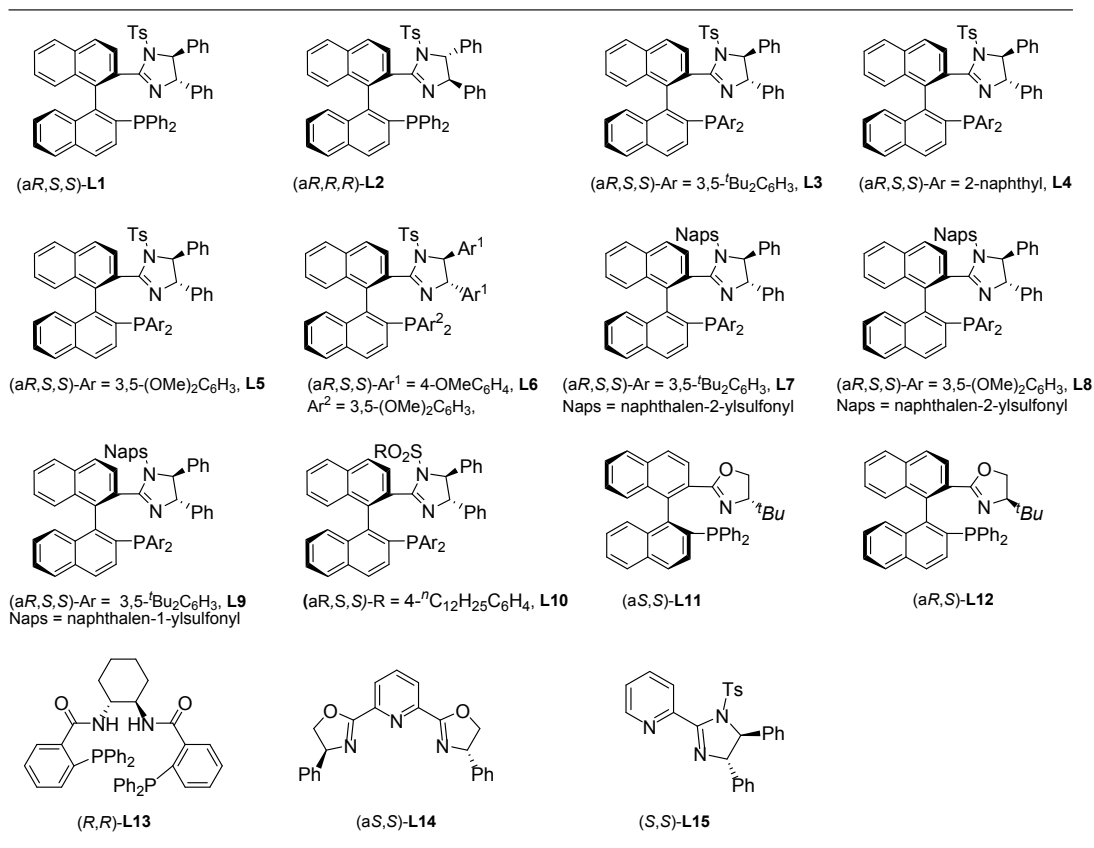

## 6. General procedure for palladium-catalyzed asymmetric formal [3+2]-cycloaddition of 2-vinylspiro[cyclopropane-1,2'-indene]-1',3'-dione with 3-diazooxindole in the presence of Pd<sub>2</sub>(dba)<sub>3</sub>·CHCl<sub>3</sub> and chiral imidazolidine-phosphine ligand L8

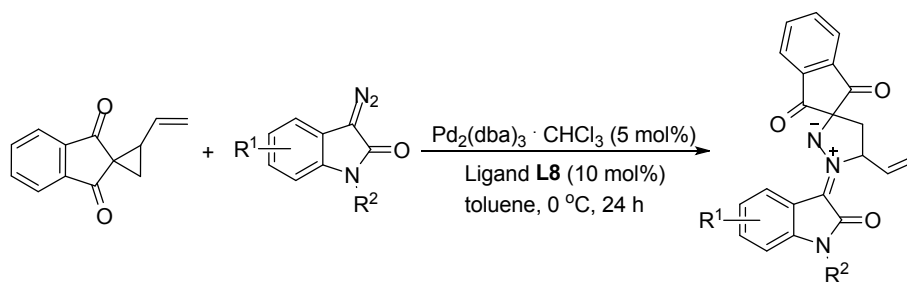

A solution of enantiomerically pure ligand **L8** (0.01 mmol, 10 mol %) and tris(dibenzylideneacetone)dipalladium(0)-chloroform adduct Pd<sub>2</sub>(dba)<sub>3</sub>CHCl<sub>3</sub> (0.005 mmol, 5 mol %) in toluene (0.25 mL) was stirred at room temperature under argon atmosphere for 30 minutes. To the solution were added a solution of 2-vinylspiro[cyclopropane-1,2'-indene]-1',3'-dione **1** (0.1 mmol, 1.0 equiv) and 3-diazooxindole **2** (0.15 mmol, 1.5 equiv) in toluene (0.5 mL), and the

reaction mixture was stirred at 0 °C for 24 hours. After the reaction completed, the mixture was concentrated in vacuo to yield the crude product, which was purified by a flash chromatography on silica gel (eluent: PE/EtOAc = 5/1 ~ 10/1) to furnish the desired product **3** as a red solid.

## 7. Characterization and spectra containing HPLC traces charts for **3**

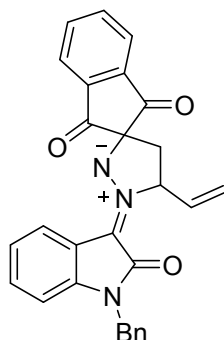

### (E)-1'-(1-benzyl-2-oxoindolin-3-ylidene)-1,3-dioxo-5'-vinyl-1,3-dihydrospiro[indene-2,3'-pyrazolidin]-1'-ium-2'-ide **3a**

A red solid, 98% yield (44 mg), 78% ee. M.p.: 118-121 °C. <sup>1</sup>H NMR (CDCl<sub>3</sub>, 400 MHz, TMS) δ 2.35 (d, *J* = 13.2 Hz, 1H, CH<sub>2</sub>), 2.87 (dd, *J* = 9.6 Hz, 13.2 Hz, 1H, CH<sub>2</sub>), 4.93 (d, *J* = 15.6 Hz, 1H, CH<sub>2</sub>), 5.10 (d, *J* = 15.6 Hz, 1H, CH<sub>2</sub>), 5.39 (d, *J* = 10.0 Hz, 1H, =CH<sub>2</sub>), 5.72 (d, *J* = 16.8 Hz, 1H, =CH<sub>2</sub>), 6.38 (ddd, *J* = 8.4 Hz, 10.0 Hz, 16.8 Hz, 1H, =CH), 6.70 (d, *J* = 8.0 Hz, 1H, ArH), 6.74-6.79 (m, 1H, CH), 6.89 (dd, *J* = 7.6 Hz, 7.6 Hz, 1H, ArH), 7.05 (dd, *J* = 7.6 Hz, 7.6 Hz, 1H, ArH), 7.23-7.33 (m, 5H, ArH), 7.87 (dd, *J* = 7.6 Hz, 7.6 Hz, 1H, ArH), 7.97-8.00 (m, 2H, ArH), 8.11-8.14 (m, 2H, ArH). <sup>13</sup>C NMR (CDCl<sub>3</sub>, 100 MHz, TMS) δ 33.4, 43.4, 76.1, 82.6, 107.8, 112.7, 119.6, 120.0, 121.6, 123.0, 124.3, 124.5, 127.1, 127.2, 127.3, 128.6, 136.1, 136.6, 136.8, 138.1, 141.5, 141.7, 160.6, 197.6, 198.1. IR (CH<sub>2</sub>Cl<sub>2</sub>) ν 2923, 2853, 1712, 1673, 1605, 1542, 1466, 1343, 1269, 1217, 1185, 1166, 759, 746, 719, 670 cm<sup>-1</sup>. Ms (MALDI) *m/z*: 447.6 (M+H<sup>+</sup>, 100); HRMS (MALDI) Calcd. for C<sub>28</sub>H<sub>22</sub>N<sub>3</sub>O<sub>3</sub> (M+H<sup>+</sup>), requires 448.1656, found: 448.1639.

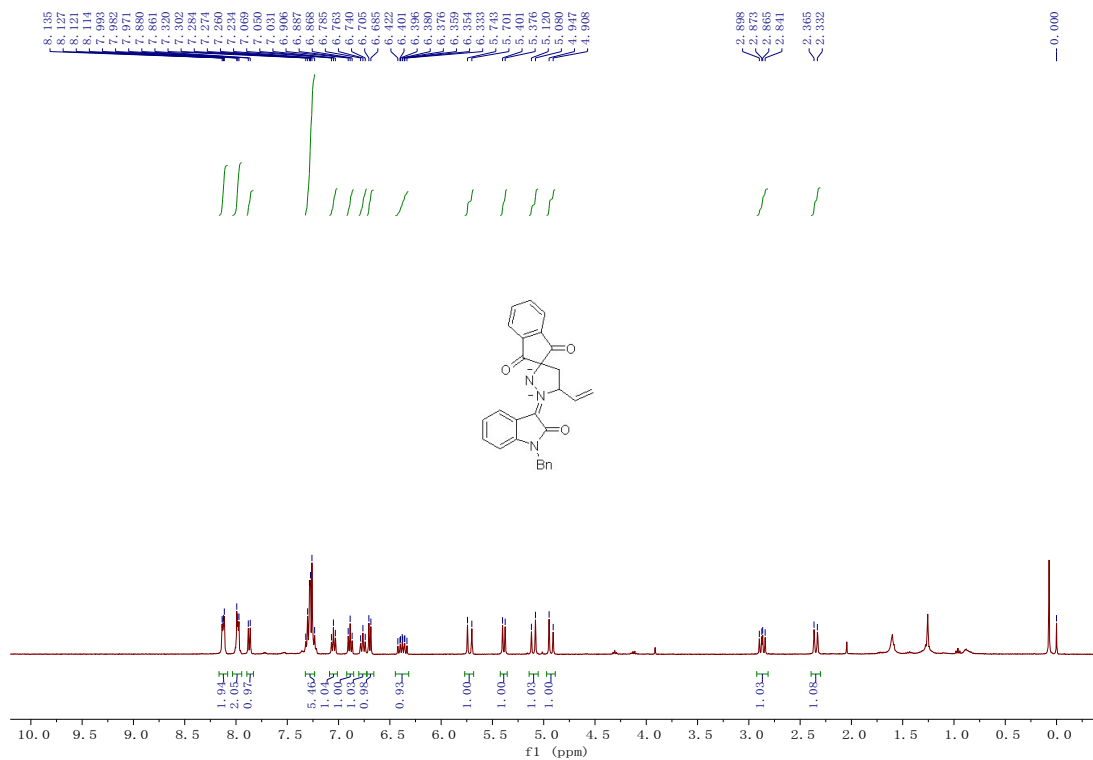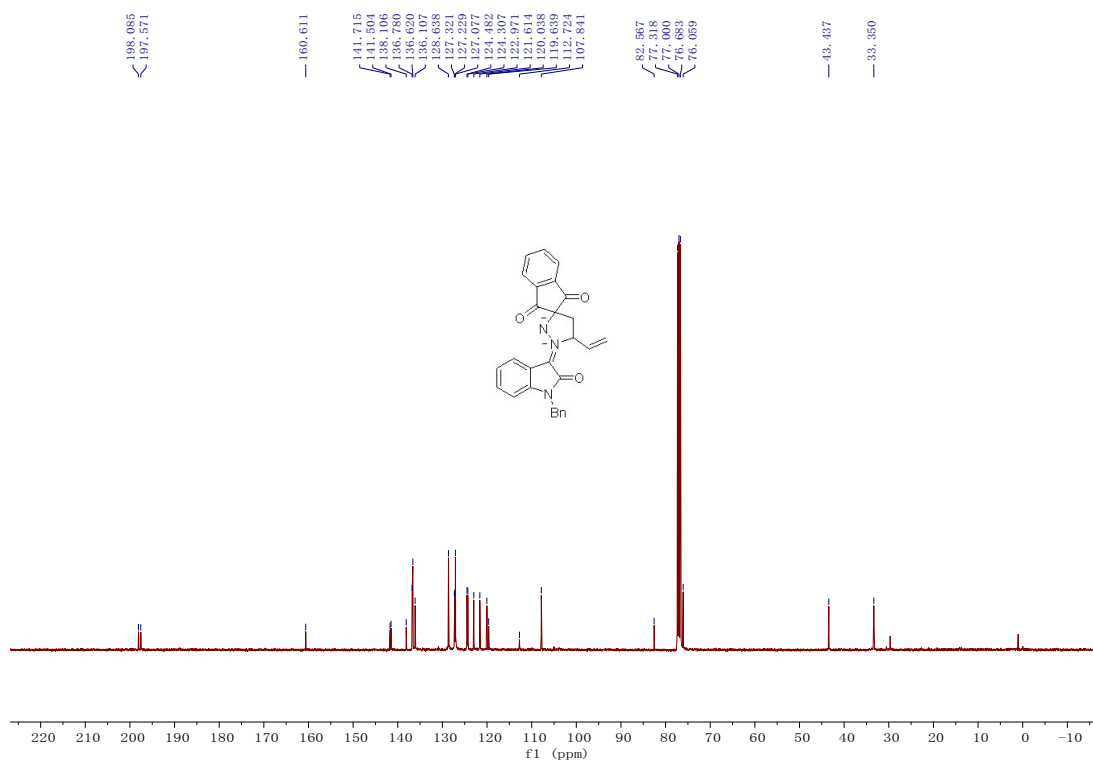

HPLC spectra:

### HPLC REPORT

Sample Name: mly-20-16-a -racemic  
 Column: IB-3  
 Velocity (mL/min): 0.7

Date: #####  
 Mobile Phase: hex/ipr = 95/5  
 Detection Wavelength (nm): 254



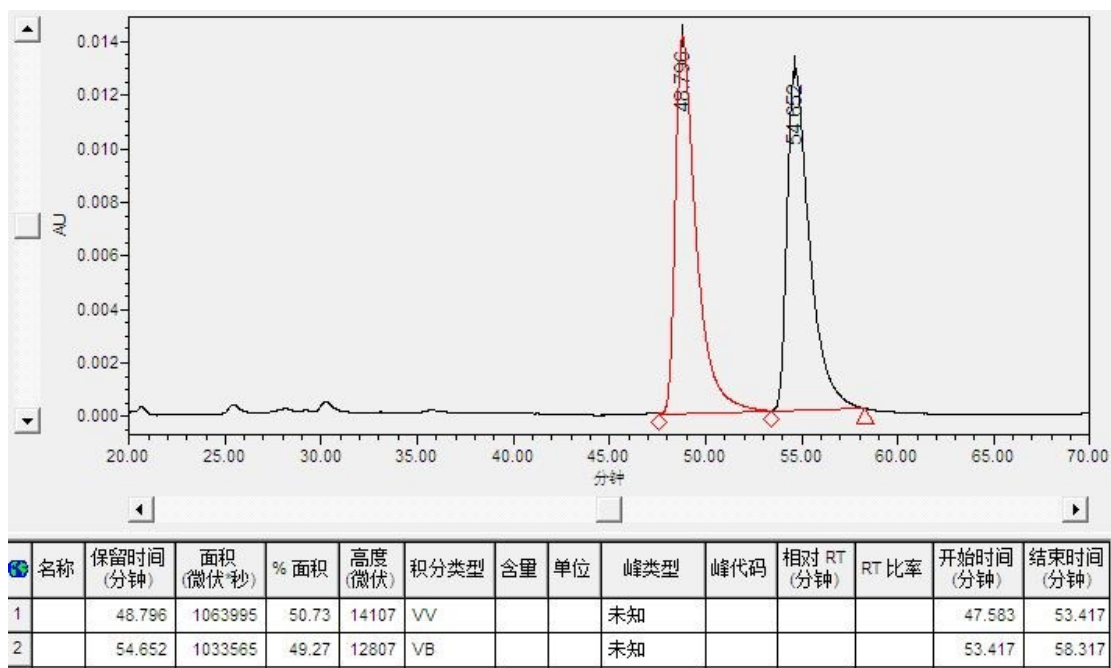

| NO | R. Time | Peak Area | Percent | Peak Height |
|----|---------|-----------|---------|-------------|
| 1  | 48.796  | 1063995   | 50.73   | 14107       |
| 2  | 54.652  | 1033565   | 49.27   | 12807       |

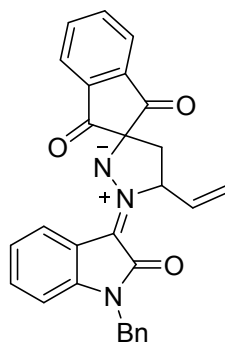

Chiral HPLC report: **3a**

### HPLC REPORT

Sample Name: mly-20-16-a-chiral  
 Column: IB-3  
 Velocity (mL/min): 0.7

Date: #####  
 Mobile Phase: hex/ipr = 95/5  
 Detection Wavelength (nm): 254

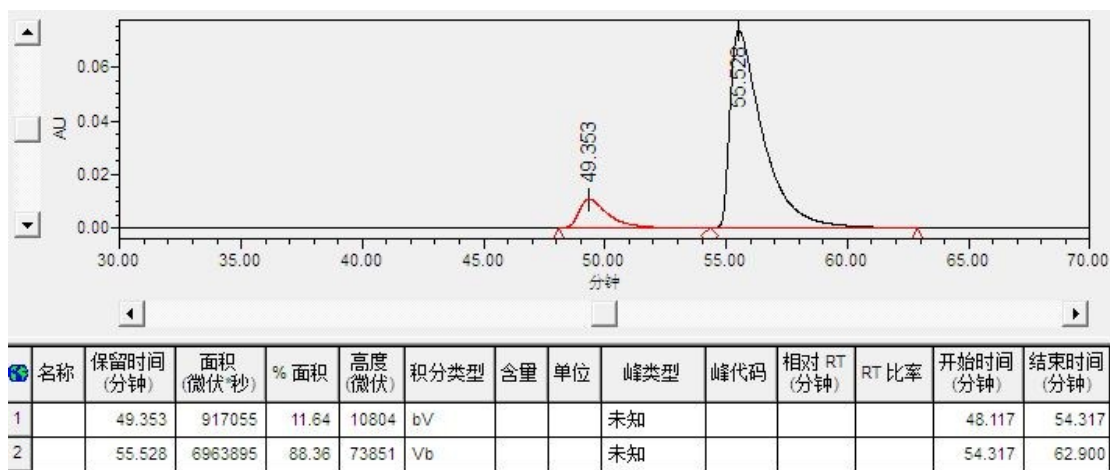

| NO | R. Time | Peak Area | Percent | Peak Height |
|----|---------|-----------|---------|-------------|
| 1  | 49.353  | 917055    | 11.64   | 10804       |
| 2  | 55.528  | 6963895   | 88.36   | 73851       |

Chiral HPLC report: Enantiomeric excess was determined by HPLC with a Chiralpak IB-3 column;  $\lambda = 254 \text{ nm}$ ; eluent: Hexane/Isopropanol = 95/5; Flow rate: 0.7 mL/min;  $t_{\text{minor}} = 49.353 \text{ min}$ ,  $t_{\text{major}} = 55.528 \text{ min}$ ; ee = 84%.  $[\alpha]_{\text{D}}^{20} = -86.3$  ( $c = 0.460$ ,  $\text{CH}_2\text{Cl}_2$ ).

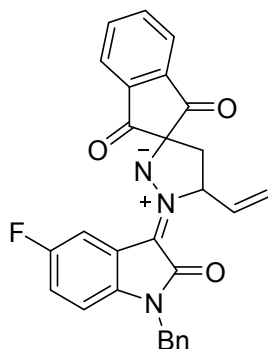

**(E)-1'-(1-benzyl-5-fluoro-2-oxoindolin-3-ylidene)-1,3-dioxo-5'-vinyl-1,3-dihydrospiro[indene-2,3'-pyrazolidin]-1'-ium-2'-ide 3b**

A red solid, 97% yield (46 mg), 64% ee. M.p.: 187-190 °C.  $^1\text{H NMR}$  ( $\text{CDCl}_3$ , 400 MHz, TMS)  $\delta$  2.36 (d,  $J = 13.2 \text{ Hz}$ , 1H,  $\text{CH}_2$ ), 2.88 (dd,  $J = 10.0 \text{ Hz}$ , 13.2 Hz, 1H,  $\text{CH}_2$ ), 4.91 (d,  $J = 16.0 \text{ Hz}$ , 1H,  $\text{CH}_2$ ), 5.08 (d,  $J = 16.0 \text{ Hz}$ , 1H,  $\text{CH}_2$ ), 5.41 (d,  $J = 10.4 \text{ Hz}$ , 1H,  $=\text{CH}_2$ ), 5.74 (d,  $J = 17.2 \text{ Hz}$ , 1H,  $=\text{CH}_2$ ), 6.37 (ddd,  $J = 8.8 \text{ Hz}$ , 10.4 Hz, 17.2 Hz, 1H,  $=\text{CH}$ ), 6.55-6.59 (m, 1H, ArH), 6.72-6.77 (m, 2H, CH, ArH), 7.25-7.31 (m, 5H, ArH), 7.61 (d,  $J = 7.6 \text{ Hz}$ , 1H, ArH), 7.98-8.00 (m, 2H, ArH),

8.12-8.14 (m, 2H, ArH).  $^{13}\text{C}$  NMR ( $\text{CDCl}_3$ , 100 MHz, TMS)  $\delta$  33.2, 43.6, 76.4, 82.8, 108.1 (d,  $J = 8.5$  Hz), 110.1 (d,  $J = 27.3$  Hz), 113.2 (d,  $J = 24.3$  Hz), 120.4, 124.4, 124.6, 127.1, 127.4, 128.7, 134.1, 135.9, 136.4, 136.8, (d,  $J = 14.2$  Hz), 141.5, 141.7, 158.6 (d,  $J = 235.7$  Hz), 160.7, 197.2, 197.6.  $^{19}\text{F}$  NMR ( $\text{CDCl}_3$ , 376 MHz,  $\text{CFCl}_3$ )  $\delta$  -122.1. IR ( $\text{CH}_2\text{Cl}_2$ )  $\nu$  2923, 2854, 1712, 1673, 1541, 1472, 1326, 1288, 1204, 1151, 1111, 976, 791, 725, 716, 699  $\text{cm}^{-1}$ . HRMS (ESI) Calcd. for  $\text{C}_{28}\text{H}_{21}\text{FN}_3\text{O}_3$  ( $\text{M}+\text{H}^+$ ), requires 466.1561, found: 466.1561.

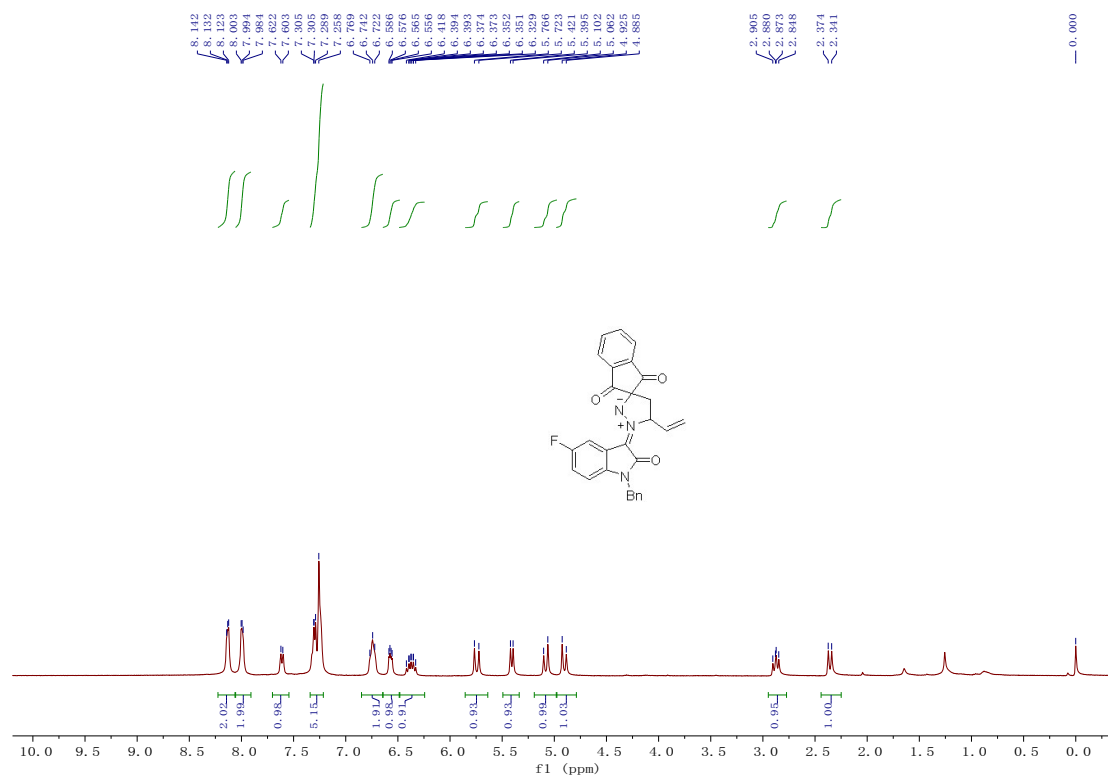

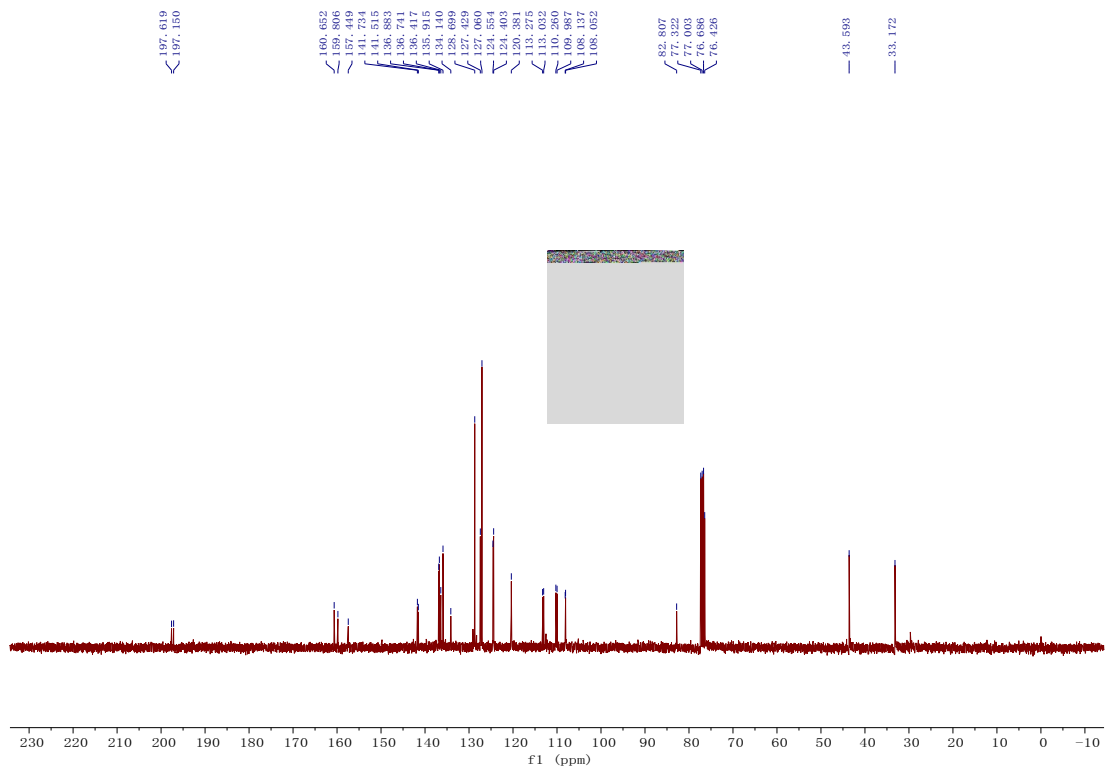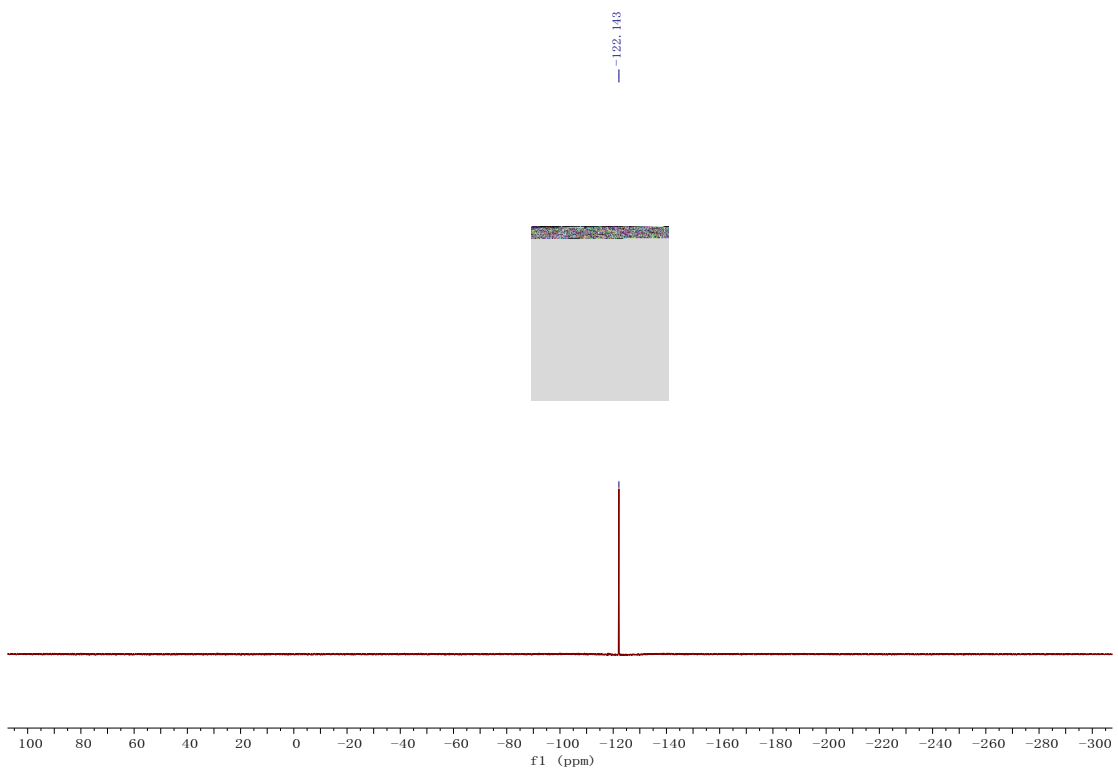

**HPLC spectra:**

**HPLC REPORT**

Sample Name: cb-1-83-a-racemic  
 Column: IB-3

Date: #####  
 Mobile Phase: hex/ipr = 95/5

Velocity (mL/min): 0.7

Detection Wavelength (nm): 254

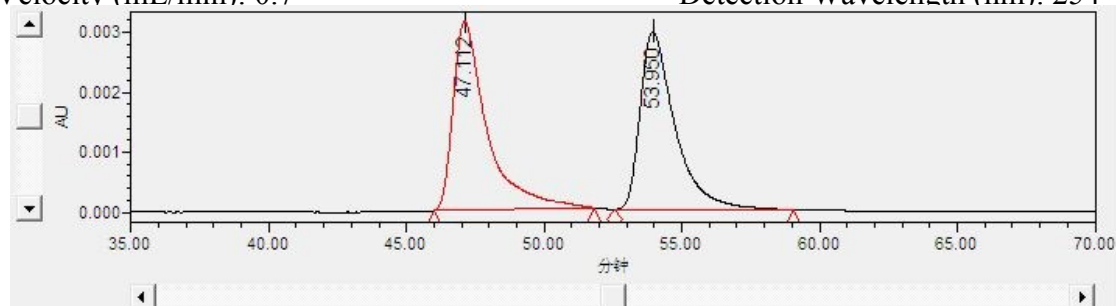

| 名称 | 保留时间 (分钟) | 面积 (微伏秒) | % 面积  | 高度 (微伏) | 积分类型 | 含量 | 单位 | 峰类型 | 峰代码 | 相对 RT (分钟) | RT 比率 | 开始时间 (分钟) | 结束时间 (分钟) |
|----|-----------|----------|-------|---------|------|----|----|-----|-----|------------|-------|-----------|-----------|
| 1  | 47.112    | 269878   | 50.60 | 3144    | bb   |    |    | 未知  |     |            |       | 46.000    | 51.833    |
| 2  | 53.950    | 263468   | 49.40 | 2976    | VB   |    |    | 未知  |     |            |       | 52.550    | 59.067    |

| NO | R. Time | Peak Area | Percent | Peak Height |
|----|---------|-----------|---------|-------------|
| 1  | 47.112  | 269878    | 50.60   | 3144        |
| 2  | 53.950  | 263468    | 49.40   | 2976        |

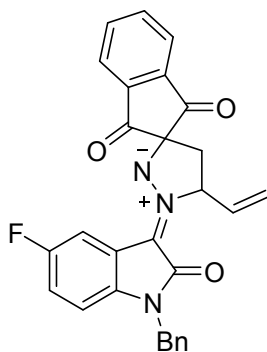Chiral HPLC report: **3b****HPLC REPORT**

Sample Name: cb-1-83-a-chiral

Column: IB-3

Velocity (mL/min): 0.7

Date: #####

Mobile Phase: hex/ipr = 95/5

Detection Wavelength (nm): 254

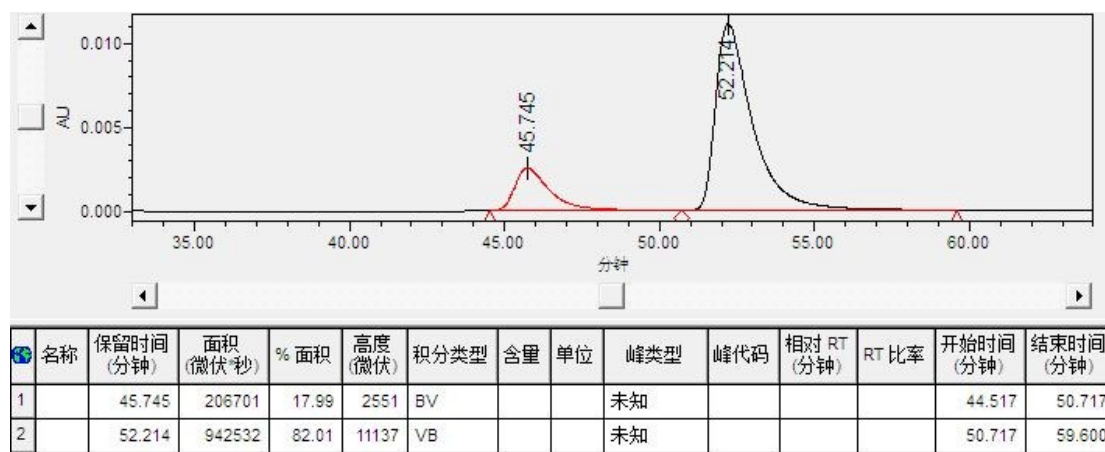

| NO | R. Time | Peak Area | Percent | Peak Height |
|----|---------|-----------|---------|-------------|
| 1  | 45.745  | 206701    | 17.99   | 2551        |
| 2  | 52.214  | 942532    | 82.01   | 11137       |

Chiral HPLC report: Enantiomeric excess was determined by HPLC with a Chiralpak IB-3 column;  $\lambda = 254 \text{ nm}$ ; eluent: Hexane/Isopropanol = 95/5; Flow rate: 0.7 mL/min;  $t_{\text{minor}} = 45.745 \text{ min}$ ,  $t_{\text{major}} = 52.214 \text{ min}$ ; ee = 64%.  $[\alpha]_{\text{D}}^{20} = -46.2$  (c = 0.700,  $\text{CH}_2\text{Cl}_2$ ).

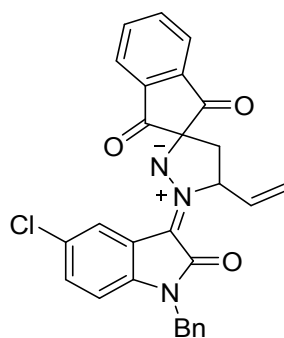

**(E)-1'-(1-benzyl-5-chloro-2-oxoindolin-3-ylidene)-1,3-dioxo-5'-vinyl-1,3-dihydrospiro[indene-2,3'-pyrazolidin]-1'-ium-2'-ide 3c**

A red solid, 92% yield (44 mg), 78% ee. M.p.: 141-144 °C.  $^1\text{H NMR}$  ( $\text{CDCl}_3$ , 400 MHz, TMS)  $\delta$  2.35 (d,  $J = 13.2 \text{ Hz}$ , 1H,  $\text{CH}_2$ ), 2.86 (dd,  $J = 9.2 \text{ Hz}$ , 12.4 Hz, 1H,  $\text{CH}_2$ ), 4.90 (d,  $J = 16.0 \text{ Hz}$ , 1H,  $\text{CH}_2$ ), 5.08 (d,  $J = 16.0 \text{ Hz}$ , 1H,  $\text{CH}_2$ ), 5.40 (d,  $J = 10.0 \text{ Hz}$ , 1H,  $=\text{CH}_2$ ), 5.74 (d,  $J = 16.8 \text{ Hz}$ , 1H,  $=\text{CH}_2$ ), 6.32-6.42 (m, 1H,  $=\text{CH}$ ), 6.59 (d,  $J = 8.4 \text{ Hz}$ , 1H, ArH), 6.75 (dd,  $J = 9.2 \text{ Hz}$ , 9.2 Hz, 1H, CH), 7.00 (d,  $J = 8.0 \text{ Hz}$ , 1H, ArH), 7.24-7.31 (m, 5H, ArH), 7.85 (s, 1H, ArH), 7.97-8.00 (m, 2H, ArH), 8.12-8.15 (m, 2H, ArH).  $^{13}\text{C NMR}$  ( $\text{CDCl}_3$ , 100 MHz, TMS)  $\delta$  33.4, 43.5, 76.4, 82.7, 108.6,

111.8, 120.5, 120.8, 122.4, 124.4, 124.6, 126.6, 126.9, 127.0, 127.5, 128.7, 135.8, 136.2, 136.3, 136.8, 136.9, 141.4, 141.7, 160.3, 197.2, 197.8. IR (CH<sub>2</sub>Cl<sub>2</sub>) v 3028, 2924, 2854, 1710, 1672, 1496, 1465, 1287, 1262, 1163, 1120, 968, 802, 732, 697, 679 cm<sup>-1</sup>. MS (MALDI) m/z: 482.1 (M+H<sup>+</sup>, 100); HRMS (MALDI) Calcd. for C<sub>28</sub>H<sub>21</sub>ClN<sub>3</sub>O<sub>3</sub> (M+H<sup>+</sup>), requires 482.1266, found: 482.1256.

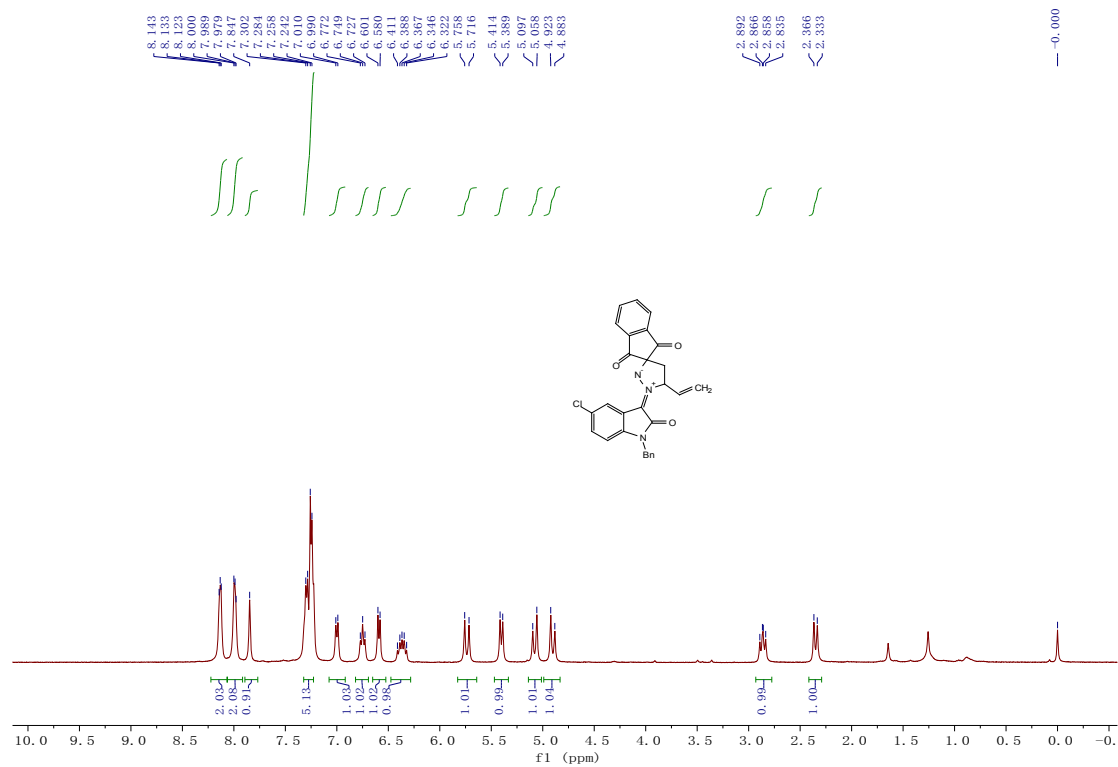

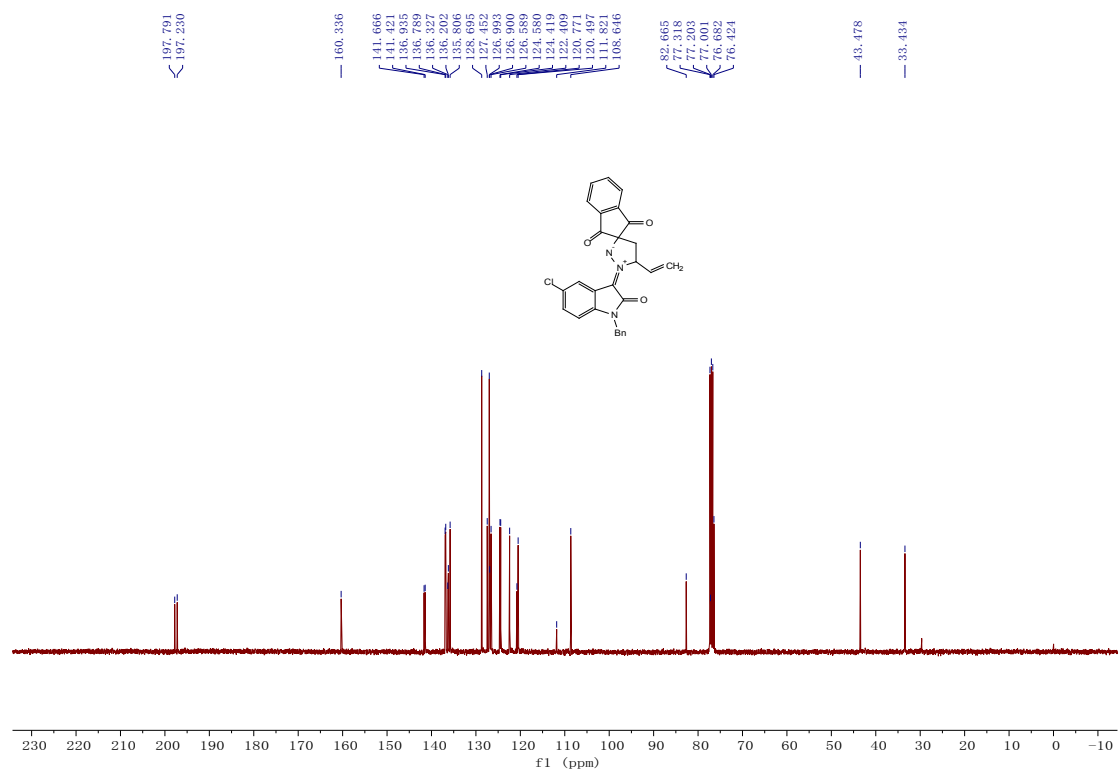

## HPLC spectra:

## HPLC REPORT

Sample Name: cb-2-3-a-racemic

Date: ####

Column: IB-3

Mobile Phase: hex/ipr = 95/5

Velocity (mL/min): 0.7

Detection Wavelength (nm): 254

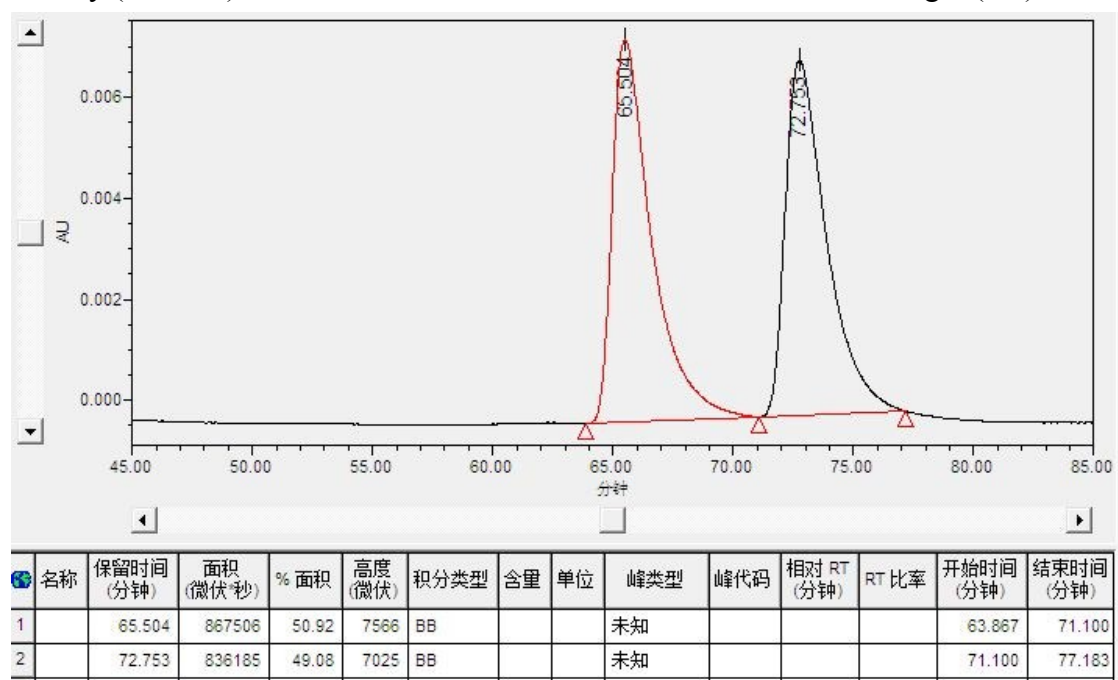



| NO | R. Time | Peak Area | Percent | Peak Height |
|----|---------|-----------|---------|-------------|
| 1  | 65.504  | 867506    | 50.92   | 7566        |
| 2  | 72.753  | 836185    | 49.08   | 7025        |

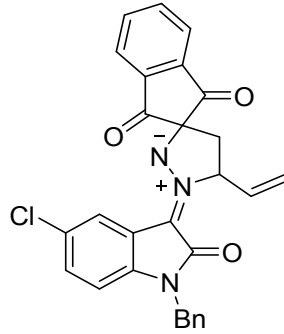

Chiral HPLC report: **3c**

### HPLC REPORT

Sample Name: cb-2-3-a-chiral

Date: ####

Column: IB-3

Mobile Phase: hex/ipr = 95/5

Velocity (mL/min): 0.7

Detection Wavelength (nm): 254

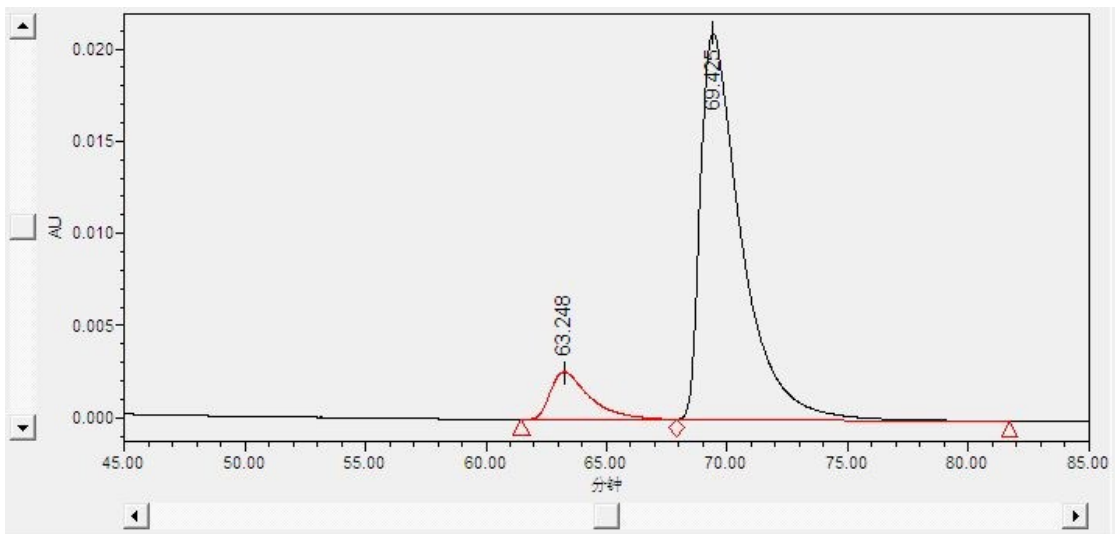

| 名称 | 保留时间 (分钟) | 面积 (微伏秒) | % 面积  | 高度 (微伏) | 积分类型 | 含量 | 单位 | 峰类型 | 峰代码 | 相对 RT (分钟) | RT 比率 | 开始时间 (分钟) | 结束时间 (分钟) |
|----|-----------|----------|-------|---------|------|----|----|-----|-----|------------|-------|-----------|-----------|
| 1  | 63.248    | 304247   | 10.82 | 2597    | BV   |    |    | 未知  |     |            |       | 61.483    | 67.900    |
| 2  | 69.425    | 2508093  | 89.18 | 20990   | VB   |    |    | 未知  |     |            |       | 67.900    | 81.733    |

| NO | R. Time | Peak Area | Percent | Peak Height |
|----|---------|-----------|---------|-------------|
| 1  | 63.248  | 304247    | 10.82   | 2597        |
| 2  | 69.425  | 2508093   | 89.18   | 20990       |

---

Chiral HPLC report: Enantiomeric excess was determined by HPLC with a Chiralpak IB-3 column;  $\lambda = 254 \text{ nm}$ ; eluent: Hexane/Isopropanol = 95/5; Flow rate: 0.7 mL/min;  $t_{\text{minor}} = 63.248 \text{ min}$ ,  $t_{\text{major}} = 69.425 \text{ min}$ ; ee = 78%.  $[\alpha]_{\text{D}}^{20} = -72.0$  (c = 0.500,  $\text{CH}_2\text{Cl}_2$ ).

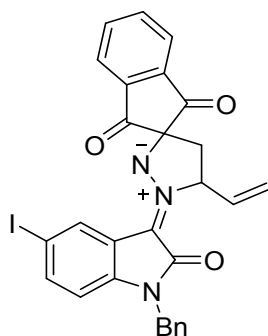

**(E)-1'-(1-benzyl-5-iodo-2-oxoindolin-3-ylidene)-1,3-dioxo-5'-vinyl-1,3-dihydrospiro[indene-2,3'-pyrazolidin]-1'-ium-2'-ide 3d**

A red solid, 98% yield (56 mg), 82% ee. M.p.: 213-214 °C.  $^1\text{H}$  NMR ( $\text{CDCl}_3$ , 400 MHz, TMS)  $\delta$  2.34 (d,  $J = 12.8 \text{ Hz}$ , 1H,  $\text{CH}_2$ ), 2.84 (dd,  $J = 10.0 \text{ Hz}$ , 12.8 Hz, 1H,  $\text{CH}_2$ ), 4.89 (d,  $J = 16.0 \text{ Hz}$ , 1H,  $\text{CH}_2$ ), 5.07 (d,  $J = 16.0 \text{ Hz}$ , 1H,  $\text{CH}_2$ ), 5.39 (d,  $J = 10.0 \text{ Hz}$ , 1H,  $=\text{CH}_2$ ), 5.73 (d,  $J = 16.8 \text{ Hz}$ , 1H,  $=\text{CH}_2$ ), 6.31-6.41 (m, 1H,  $=\text{CH}$ ), 6.46 (d,  $J = 7.6 \text{ Hz}$ , 1H, ArH), 6.76 (dd,  $J = 10.0 \text{ Hz}$ , 10.0 Hz, 1H, CH), 7.23-7.36 (m, 6H, ArH), 7.99-8.01 (m, 2H, ArH), 8.13-8.14 (m, 3H, ArH).  $^{13}\text{C}$  NMR ( $\text{CDCl}_3$ , 100 MHz, TMS)  $\delta$  33.7, 43.4, 76.4, 82.6, 84.5, 109.8, 111.4, 120.5, 121.6, 124.4, 124.6, 127.0, 127.5, 128.7, 130.6, 135.4, 135.8, 136.1, 136.8, 137.0, 137.3, 141.4, 141.6, 160.0, 197.3, 198.0. IR ( $\text{CH}_2\text{Cl}_2$ )  $\nu$  2923, 2853, 1712, 1677, 1537, 1464, 1271, 1164, 1124, 917, 786, 756, 699, 673, 659  $\text{cm}^{-1}$ . HRMS (ESI) Calcd. for  $\text{C}_{28}\text{H}_{21}\text{IN}_3\text{O}_3$  ( $\text{M}+\text{H}^+$ ), requires 574.0622, found: 574.0623.

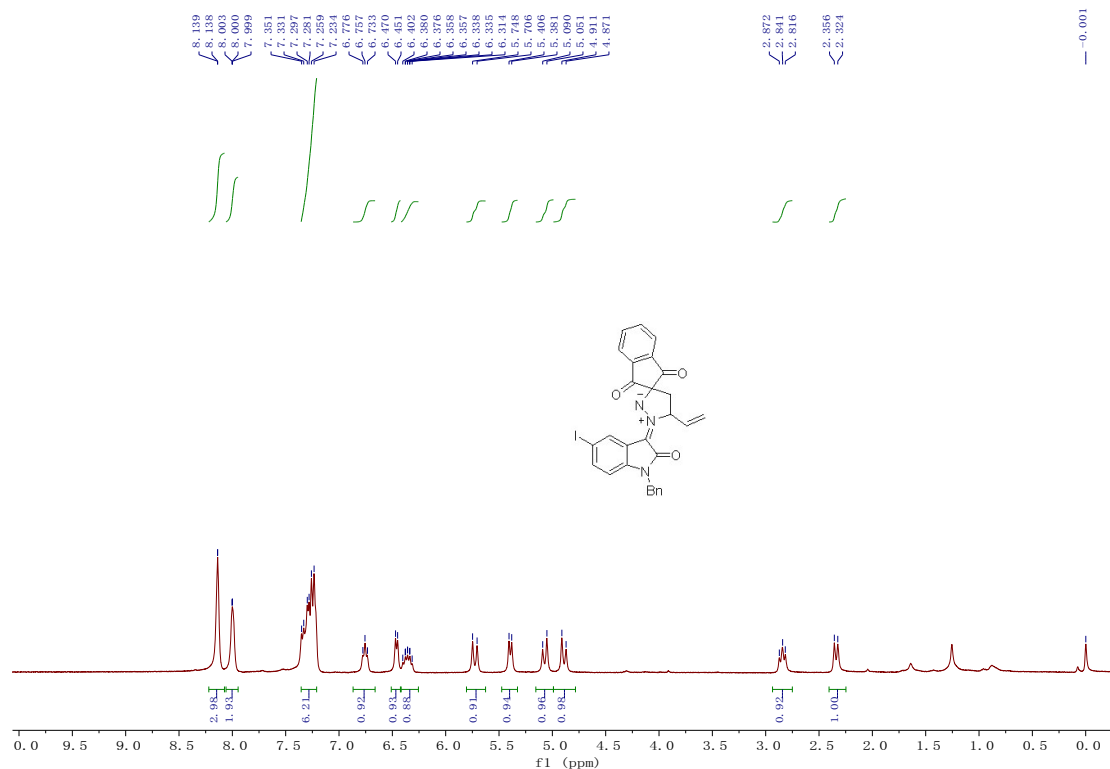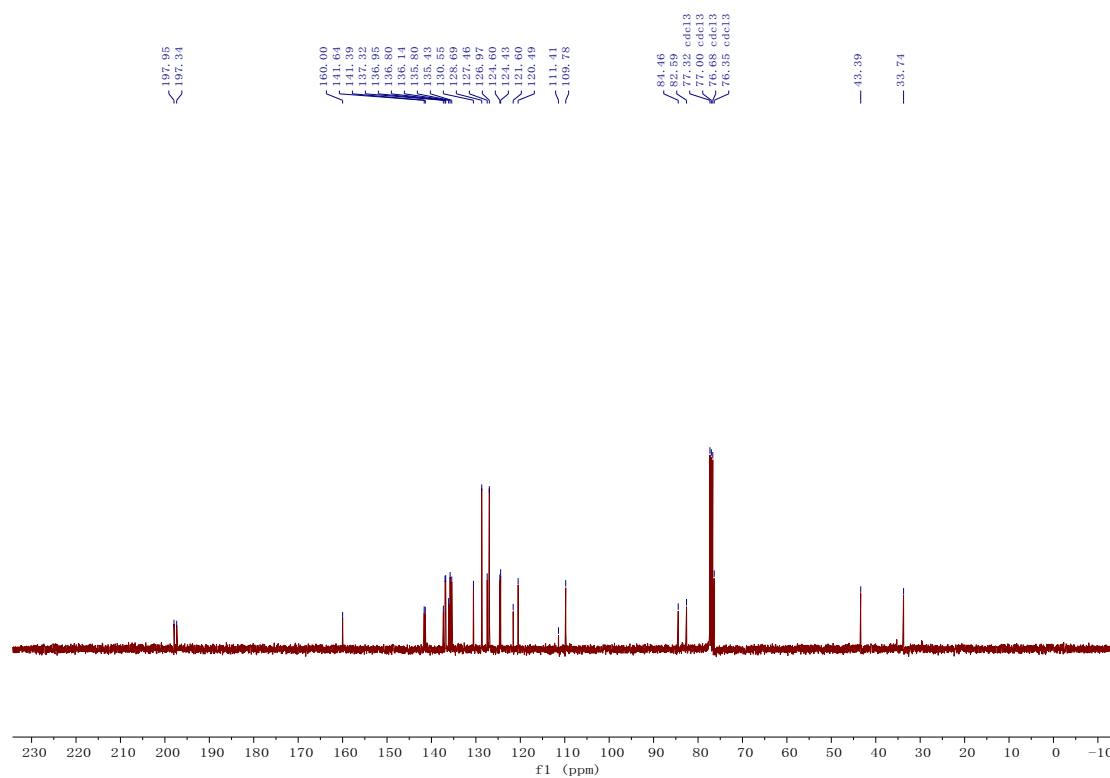

HPLC spectra:

### HPLC REPORT

Sample Name: cb-1-83-3-2-racemic  
 Column: od-h

Date: #####  
 Mobile Phase: hex/ipr = 70/30

Velocity (mL/min): 0.5

Detection Wavelength (nm): 230

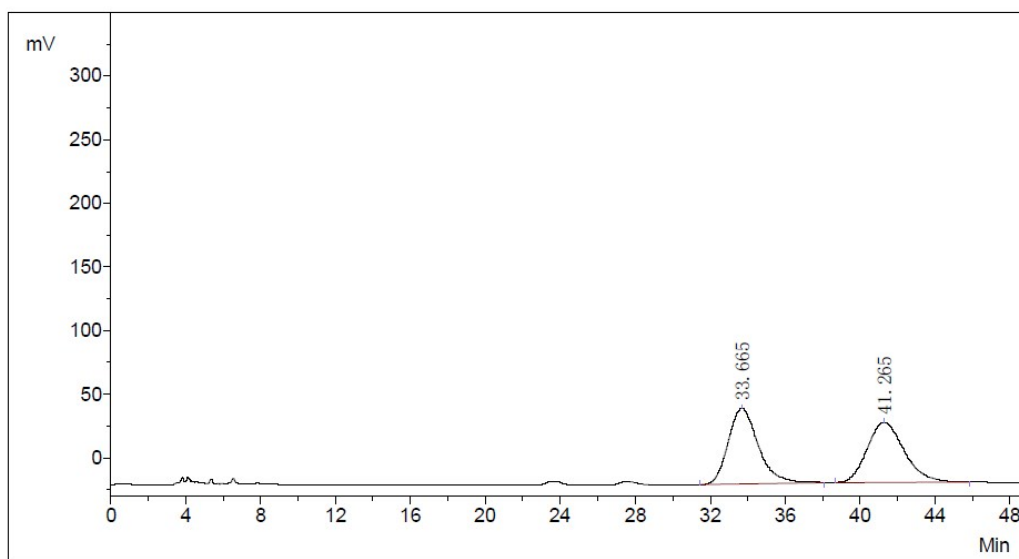

| No.   | PeakNo | ID. Name | R. Time | PeakHeight | PeakArea   | PerCent  |
|-------|--------|----------|---------|------------|------------|----------|
| 1     | 1      | Unknown  | 33.665  | 59067.3    | 6614751.3  | 50.5396  |
| 2     | 2      | Unknown  | 41.265  | 46912.4    | 6473498.0  | 49.4604  |
| Total |        |          |         | 105979.7   | 13088249.3 | 100.0000 |

| NO | R. Time | Peak Area | Percent | Peak Height |
|----|---------|-----------|---------|-------------|
| 1  | 33.665  | 6614751   | 50.54   | 59067       |
| 2  | 41.265  | 6473498   | 49.46   | 46912       |

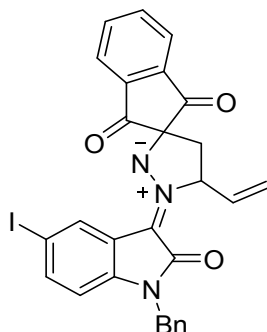

Chiral HPLC report: **3d**

### HPLC REPORT

Sample Name: cb-1-83-3-1-chiral

Date: #####

Column: ad-h

Mobile Phase: hex/ipr = 70/30

Velocity (mL/min): 0.5

Detection Wavelength (nm): 230

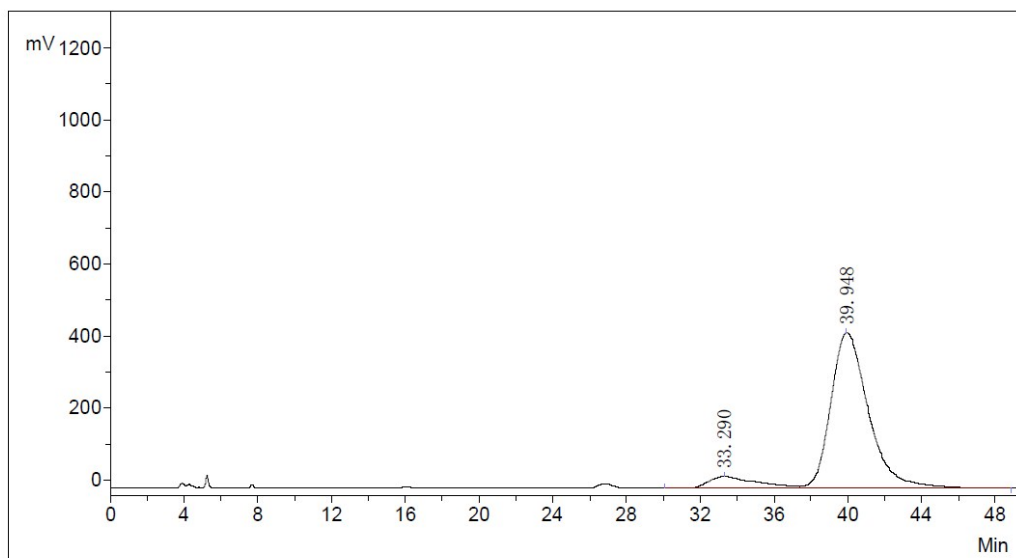

| No.   | PeakNo | ID. Name | R. Time | PeakHeight | PeakArea   | PerCent  |
|-------|--------|----------|---------|------------|------------|----------|
| 1     | 1      | Unknown  | 33.290  | 32914.7    | 6173280.4  | 9.1123   |
| 2     | 2      | Unknown  | 39.948  | 432993.7   | 61573224.7 | 90.8877  |
| Total |        |          |         | 465908.4   | 67746505.1 | 100.0000 |

| NO | R. Time | Peak Area | Percent | Peak Height |
|----|---------|-----------|---------|-------------|
| 1  | 33.290  | 6173280   | 9.11    | 32915       |
| 2  | 39.948  | 61573225  | 90.89   | 432994      |

Chiral HPLC report: Enantiomeric excess was determined by HPLC with a Chiralpak od-h column;  $\lambda = 230$  nm; eluent: Hexane/Isopropanol = 70/30; Flow rate: 0.5 mL/min;  $t_{\text{minor}} = 33.290$  min,  $t_{\text{major}} = 39.948$  min; ee = 82%.  $[\alpha]_{\text{D}}^{20} = -29.2$  (c = 0.380,  $\text{CH}_2\text{Cl}_2$ ).

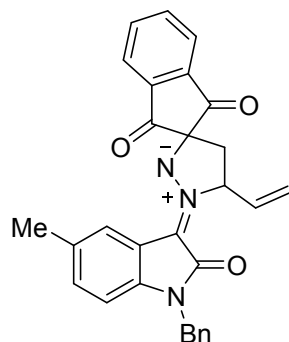

**(E)-1'-(1-benzyl-5-methyl-2-oxoindolin-3-ylidene)-1,3-dioxo-5'-vinyl-1,3-dihydrospiro[indene-2,3'-pyrazolidin]-1'-ium-2'-ide 3e**

A red solid, quantitative yield (46 mg), 69% ee. M.p.: 209-211 °C. <sup>1</sup>H NMR (CDCl<sub>3</sub>, 400 MHz, TMS) δ 2.20 (s, 3H, CH<sub>3</sub>), 2.33 (d, *J* = 12.4 Hz, 1H, CH<sub>2</sub>), 2.84 (dd, *J* = 10.0 Hz, 12.4 Hz, 1H, CH<sub>2</sub>), 4.90 (d, *J* = 16.0 Hz, 1H, CH<sub>2</sub>), 5.08 (d, *J* = 16.0 Hz, 1H, CH<sub>2</sub>), 5.38 (d, *J* = 10.0 Hz, 1H, =CH<sub>2</sub>), 5.71 (d, *J* = 17.2 Hz, 1H, =CH<sub>2</sub>), 6.33-6.42 (m, 1H, =CH), 6.58 (d, *J* = 8.0 Hz, 1H, ArH), 6.78 (dd, *J* = 10.0 Hz, 10.0 Hz, 1H, CH), 6.85 (d, *J* = 7.6 Hz, 1H, ArH), 7.22-7.29 (m, 5H, ArH), 7.70 (s, 1H, ArH), 7.97-7.98 (m, 2H, ArH), 8.11-8.12 (m, 2H, ArH). <sup>13</sup>C NMR (CDCl<sub>3</sub>, 100 MHz, TMS) δ 21.1, 33.8, 43.4, 75.8, 82.3, 107.6, 112.9, 119.6, 119.9, 123.5, 124.3, 124.5, 127.0, 127.2, 127.7, 128.6, 131.0, 136.0, 136.1, 136.6, 136.7, 136.8, 141.4, 141.6, 160.7, 197.9, 198.5. IR (CH<sub>2</sub>Cl<sub>2</sub>) ν 2964, 2923, 1709, 1668, 1538, 1496, 1353, 1266, 1190, 1164, 1124, 926, 801, 729, 715, 698 cm<sup>-1</sup>. HRMS (ESI) Calcd. for C<sub>29</sub>H<sub>24</sub>N<sub>3</sub>O<sub>3</sub> (M+H<sup>+</sup>), requires 462.1812, found: 462.1807.

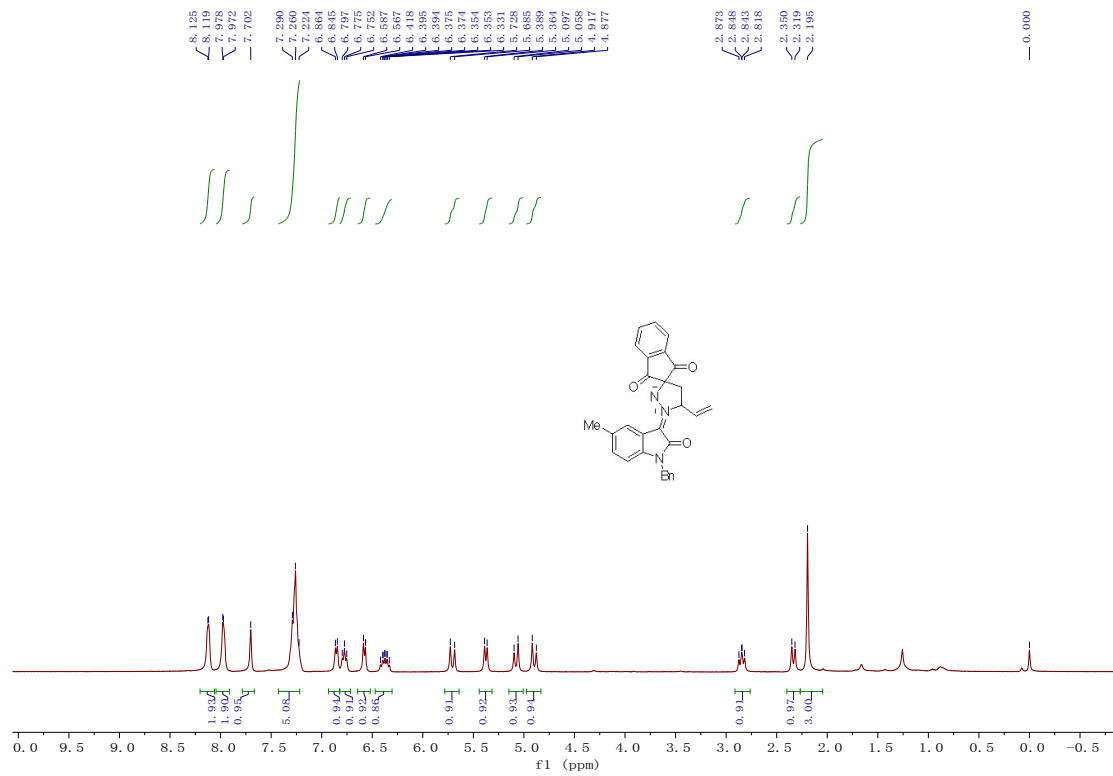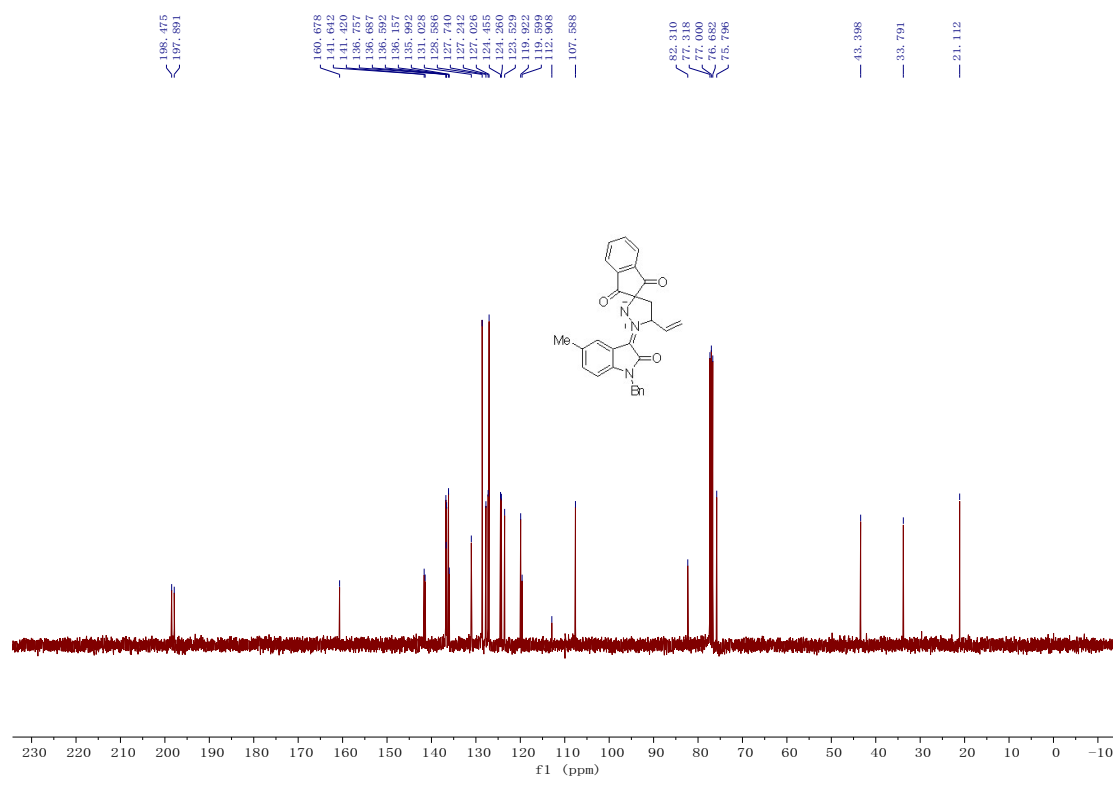

HPLC spectra:

### HPLC REPORT

Sample Name: cb-1-83-2-2-racemic  
 Column: ad-h

Date: #####  
 Mobile Phase: hex/ipr = 70/30

Velocity (mL/min): 0.5

Detection Wavelength (nm): 230

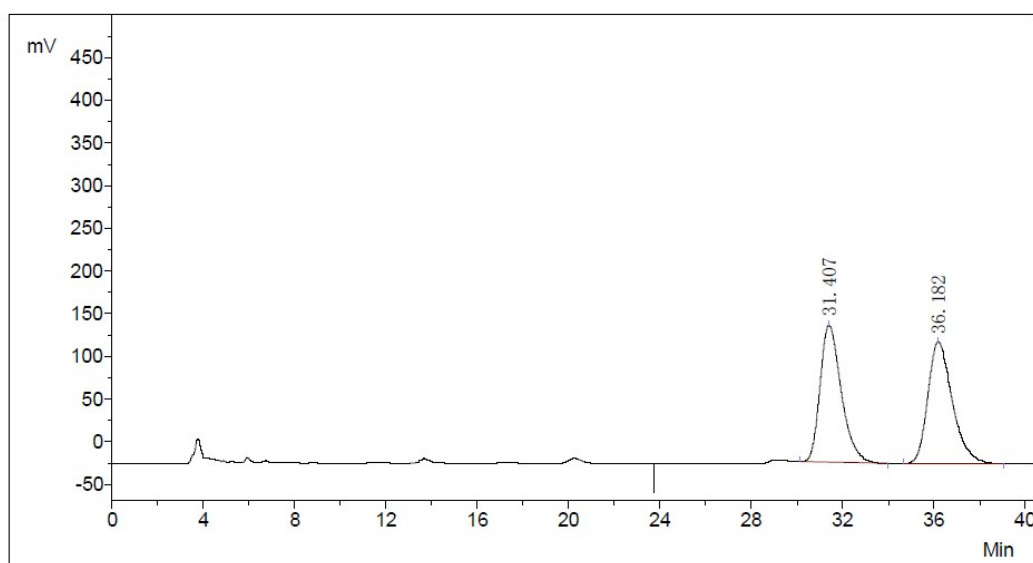

| No.   | PeakNo | ID. Name | R. Time | PeakHeight | PeakArea   | PerCent  |
|-------|--------|----------|---------|------------|------------|----------|
| 1     | 1      | Unknown  | 31.407  | 160358.3   | 10343968.6 | 49.6032  |
| 2     | 2      | Unknown  | 36.182  | 141918.8   | 10509467.2 | 50.3968  |
| Total |        |          |         | 302277.1   | 20853435.8 | 100.0000 |

| NO | R. Time | Peak Area | Percent | Peak Height |
|----|---------|-----------|---------|-------------|
| 1  | 31.407  | 10343969  | 49.60   | 160358      |
| 2  | 36.182  | 10509467  | 50.40   | 141919      |

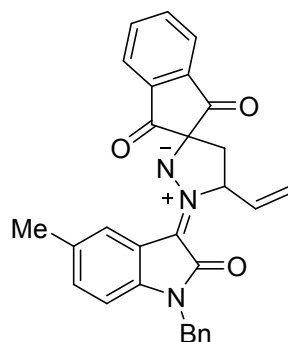

Chiral HPLC report: **3e**

### HPLC REPORT

Sample Name: cb-1-83-2-1-chiral

Date: #####



Column: ad-h  
Velocity (mL/min): 0.5

Mobile Phase: hex/ipr = 70/30  
Detection Wavelength (nm): 230

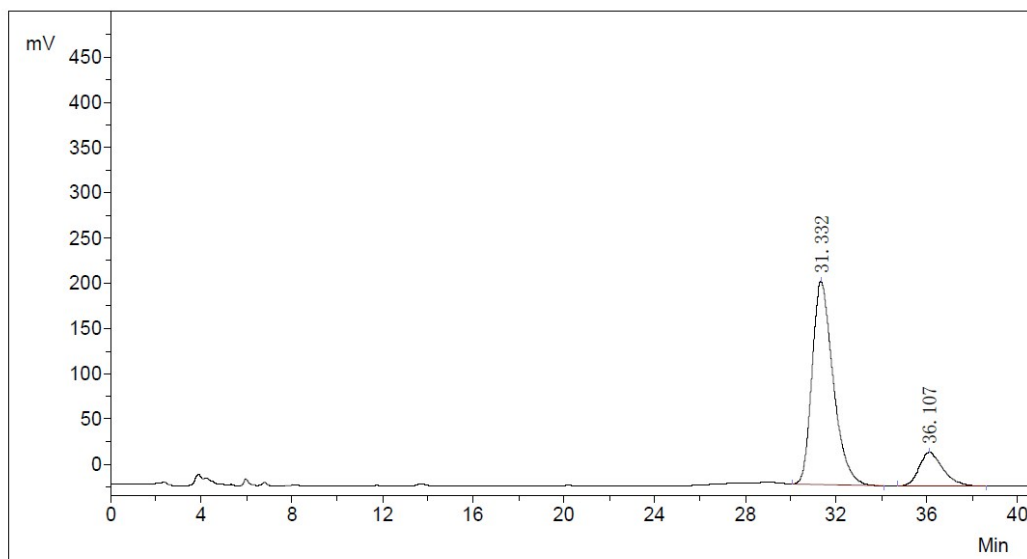

| No.   | PeakNo | ID. Name | R. Time | PeakHeight | PeakArea   | PerCent  |
|-------|--------|----------|---------|------------|------------|----------|
| 1     | 1      | Unknown  | 31.332  | 223715.7   | 14489565.5 | 84.4093  |
| 2     | 2      | Unknown  | 36.107  | 36553.3    | 2676268.8  | 15.5907  |
| Total |        |          |         | 260269.0   | 17165834.3 | 100.0000 |

| NO | R. Time | Peak Area | Percent | Peak Height |
|----|---------|-----------|---------|-------------|
| 1  | 31.332  | 14489566  | 84.41   | 223716      |
| 2  | 36.197  | 2676269   | 15.59   | 36553       |

Chiral HPLC report: Enantiomeric excess was determined by HPLC with a Chiralpak ad-h column;  $\lambda = 230$  nm; eluent: Hexane/Isopropanol = 70/30; Flow rate: 0.5 mL/min;  $t_{\text{minor}} = 36.197$  min,  $t_{\text{major}} = 31.332$  min; ee = 69%.  $[\alpha]_{\text{D}}^{20} = -59.5$  (c = 0.340,  $\text{CH}_2\text{Cl}_2$ ).

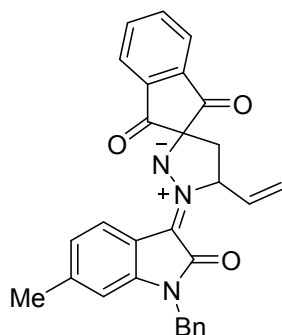

**(E)-1'-(1-benzyl-6-methyl-2-oxoindolin-3-ylidene)-1,3-dioxo-5'-vinyl-1,3-dihydrospiro[indene-2,3'-pyrazolidin]-1'-ium-2'-ide 3f**

A red solid, 78% yield (36 mg), 59% ee. M.p.: 202-205 °C. <sup>1</sup>H NMR (CDCl<sub>3</sub>, 400 MHz, TMS) δ 2.26 (s, 3H, CH<sub>3</sub>), 2.33 (dd, *J* = 0.8 Hz, *J* = 13.2 Hz, 1H, CH<sub>2</sub>), 2.86 (dd, *J* = 9.6 Hz, 13.2 Hz, 1H, CH<sub>2</sub>), 4.90 (d, *J* = 16.0 Hz, 1H, CH<sub>2</sub>), 5.07 (d, *J* = 16.0 Hz, 1H, CH<sub>2</sub>), 5.37 (d, *J* = 10.4 Hz, 1H, =CH<sub>2</sub>), 5.70 (d, *J* = 16.8 Hz, 1H, =CH<sub>2</sub>), 6.37 (ddd, *J* = 8.0 Hz, 10.4 Hz, 16.8 Hz, 1H, =CH), 6.52 (s, 1H, ArH), 6.68-6.74 (m, 2H, CH, ArH), 7.21-7.32 (m, 5H, ArH), 7.74 (d, *J* = 7.6 Hz, 1H, ArH), 7.94-7.97 (m, 2H, ArH), 8.09-8.12 (m, 2H, ArH). <sup>13</sup>C NMR (CDCl<sub>3</sub>, 100 MHz, TMS) δ 22.1, 33.4, 43.3, 75.7, 82.4, 108.6, 112.8, 117.3, 119.7, 122.3, 122.9, 124.2, 124.4, 127.0, 127.2, 128.6, 136.2, 136.5, 136.66, 136.73, 137.7, 138.5, 141.5, 141.7, 160.8, 197.8, 198.2. IR (CH<sub>2</sub>Cl<sub>2</sub>) ν 3085, 2923, 1709, 1670, 1586, 1541, 1454, 1381, 1329, 1268, 1215, 1158, 1141, 811, 756, 717, 699 cm<sup>-1</sup>. HRMS (ESI) Calcd. for C<sub>29</sub>H<sub>24</sub>N<sub>3</sub>O<sub>3</sub> (M+H<sup>+</sup>), requires 462.1812, found: 462.1815.

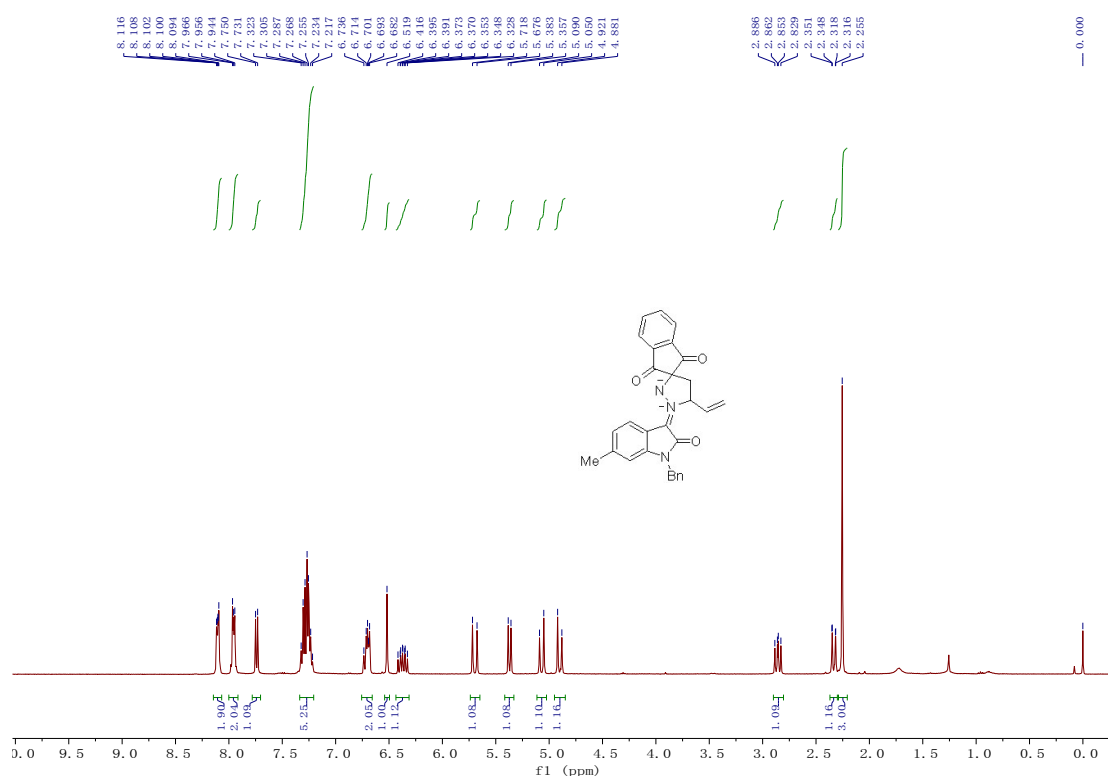

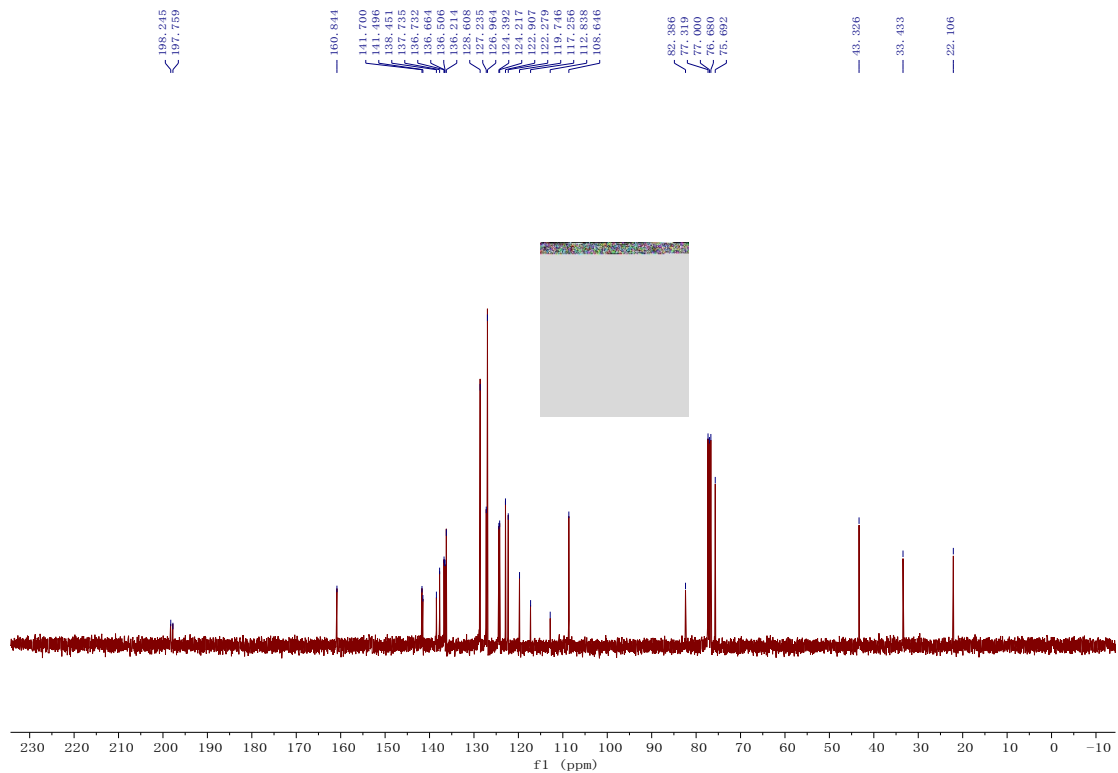

**HPLC spectra:**

**HPLC REPORT**

Sample Name: cb-1-91-a-racemic

Date: ####

Column: IB-3

Mobile Phase: hex/ipr = 95/5

Velocity (mL/min): 0.7

Detection Wavelength (nm): 254

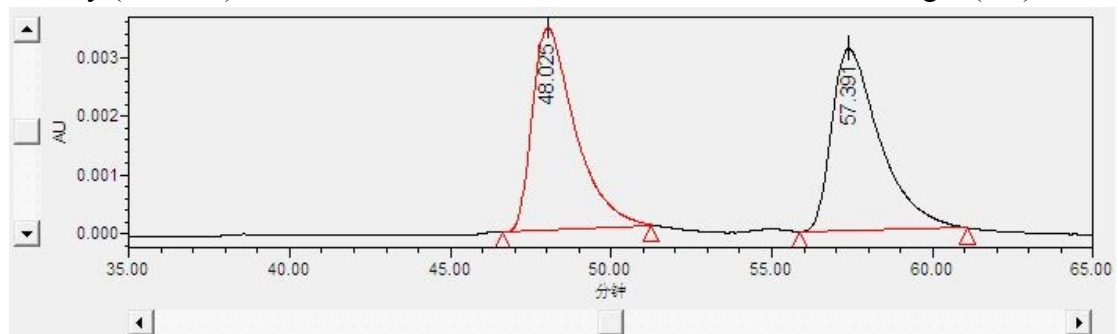

| 名称 | 保留时间 (分钟) | 面积 (微伏·秒) | % 面积  | 高度 (微伏) | 积分类型 | 含量 | 单位 | 峰类型 | 峰代码 | 相对 RT (分钟) | RT 比率 | 开始时间 (分钟) | 结束时间 (分钟) |
|----|-----------|-----------|-------|---------|------|----|----|-----|-----|------------|-------|-----------|-----------|
| 1  | 48.025    | 318997    | 49.79 | 3442    | BB   |    |    | 未知  |     |            |       | 46.633    | 51.267    |
| 2  | 57.391    | 321749    | 50.21 | 3091    | BB   |    |    | 未知  |     |            |       | 55.867    | 61.100    |

| NO | R. Time | Peak Area | Percent | Peak Height |
|----|---------|-----------|---------|-------------|
| 1  | 48.025  | 318997    | 49.79   | 3442        |

|   |        |        |       |      |
|---|--------|--------|-------|------|
| 2 | 57.391 | 321749 | 50.21 | 3091 |
|---|--------|--------|-------|------|

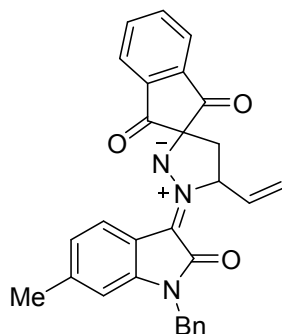

Chiral HPLC report: **3f**

### HPLC REPORT

Sample Name: cb-1-91-a-chiral

Date: #####

Column: IB-3

Mobile Phase: hex/ipr = 95/5

Velocity (mL/min): 0.7

Detection Wavelength (nm): 254

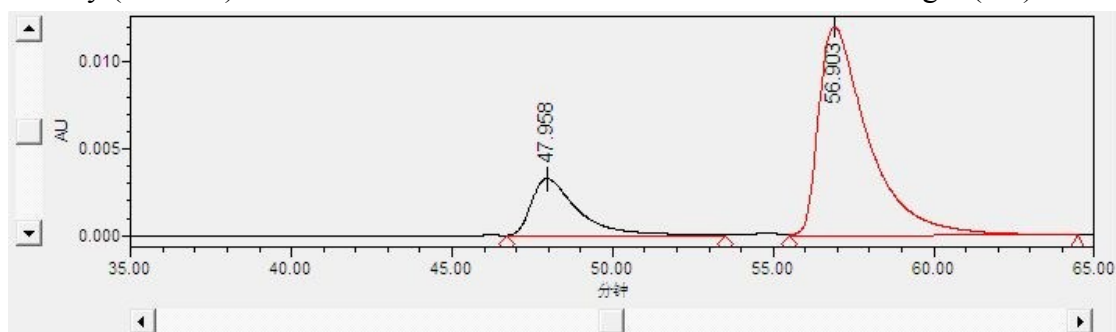

| 名称 | 保留时间 (分钟) | 面积 (微伏·秒) | % 面积  | 高度 (微伏) | 积分类型 | 含量 | 单位 | 峰类型 | 峰代码 | 相对 RT (分钟) | RT 比率 | 开始时间 (分钟) | 结束时间 (分钟) |
|----|-----------|-----------|-------|---------|------|----|----|-----|-----|------------|-------|-----------|-----------|
| 1  | 47.958    | 338374    | 20.74 | 3308    | VV   |    |    | 未知  |     |            |       | 46.683    | 53.500    |
| 2  | 56.903    | 1292882   | 79.26 | 12004   | VB   |    |    | 未知  |     |            |       | 55.483    | 64.467    |

| NO | R. Time | Peak Area | Percent | Peak Height |
|----|---------|-----------|---------|-------------|
| 1  | 47.958  | 338374    | 20.74   | 3308        |
| 2  | 56.903  | 1292882   | 79.26   | 12004       |

Chiral HPLC report: Enantiomeric excess was determined by HPLC with a Chiralpak IB-3 column;  $\lambda = 254$  nm; eluent: Hexane/Isopropanol = 95/5; Flow rate: 0.7 mL/min;  $t_{\text{minor}} = 47.958$  min,  $t_{\text{major}} = 56.903$  min; ee = 59%.  $[\alpha]_{\text{D}}^{20} = -91.3$  (c = 0.227,  $\text{CH}_2\text{Cl}_2$ ).

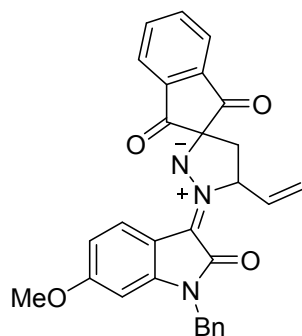

**(E)-1'-(1-benzyl-6-methoxy-2-oxoindolin-3-ylidene)-1,3-dioxo-5'-vinyl-1,3-dihydrospiro[indene-2,3'-pyrazolidin]-1'-ium-2'-ide 3g**

A red solid, 96% yield (46 mg), 78% ee. M.p.: 191-193 °C. <sup>1</sup>H NMR (CDCl<sub>3</sub>, 400 MHz, TMS) δ 2.33 (d, *J* = 12.8 Hz, 1H, CH<sub>2</sub>), 2.86 (dd, *J* = 10.0 Hz, 12.8 Hz, 1H, CH<sub>2</sub>), 3.68 (s, 3H, CH<sub>3</sub>), 4.87 (d, *J* = 15.6 Hz, 1H, CH<sub>2</sub>), 5.06 (d, *J* = 15.6 Hz, 1H, CH<sub>2</sub>), 5.37 (d, *J* = 10.4 Hz, 1H, =CH<sub>2</sub>), 5.69 (d, *J* = 16.8 Hz, 1H, =CH<sub>2</sub>), 6.28 (s, 1H, ArH), 6.33-6.42 (m, 2H, CH, =CH), 6.66 (dd, *J* = 8.8 Hz, 8.8 Hz, 1H, ArH), 7.22-7.32 (m, 5H, ArH), 7.79 (d, *J* = 8.4 Hz, 1H, ArH), 7.92-7.94 (m, 2H, ArH), 8.07-8.09 (m, 2H, ArH). <sup>13</sup>C NMR (CDCl<sub>3</sub>, 100 MHz, TMS) δ 33.5, 43.4, 55.3, 75.3, 82.1, 96.0, 105.6, 112.5, 113.4, 119.6, 124.1, 124.2, 124.3, 127.1, 127.3, 128.6, 136.2, 136.4, 136.5, 136.6, 139.8, 141.5, 141.7, 159.7, 161.0, 197.9, 198.4. IR (CH<sub>2</sub>Cl<sub>2</sub>) ν 2960, 2923, 1709, 1674, 1617, 1383, 1265, 1185, 1158, 1027, 963, 797, 735, 699, 665 cm<sup>-1</sup>. HRMS (ESI) Calcd. for C<sub>29</sub>H<sub>24</sub>N<sub>3</sub>O<sub>4</sub> (M+H<sup>+</sup>), requires 478.1761, found: 478.1763.

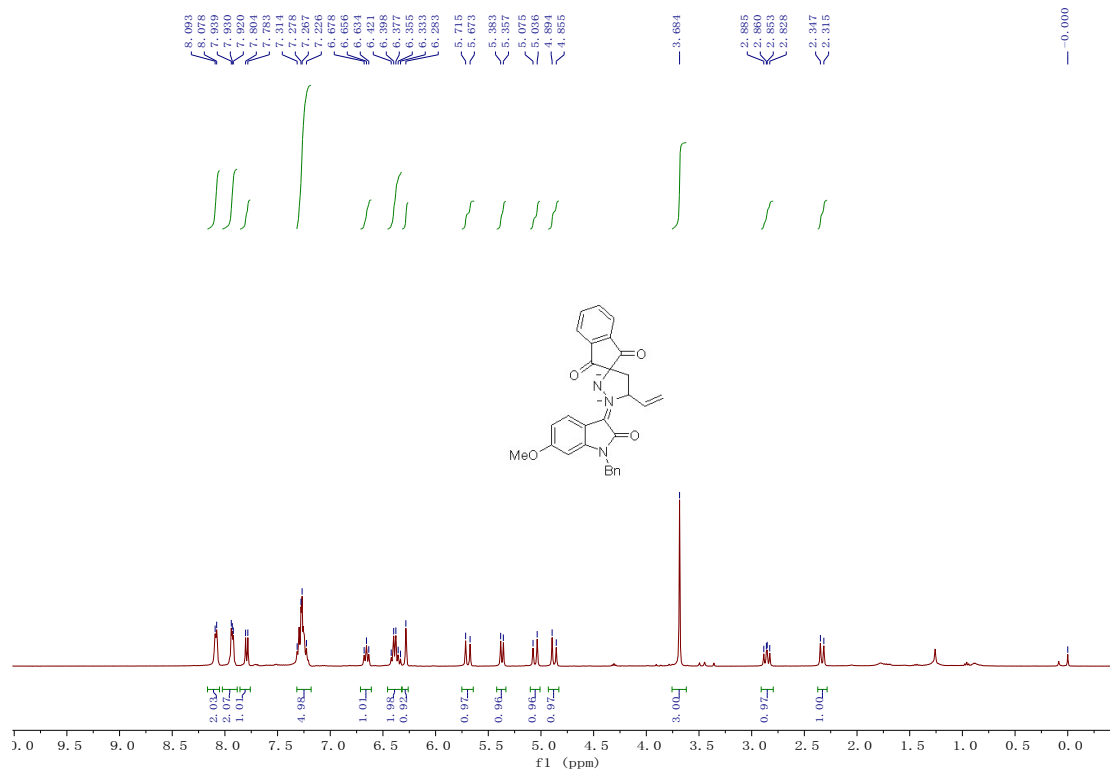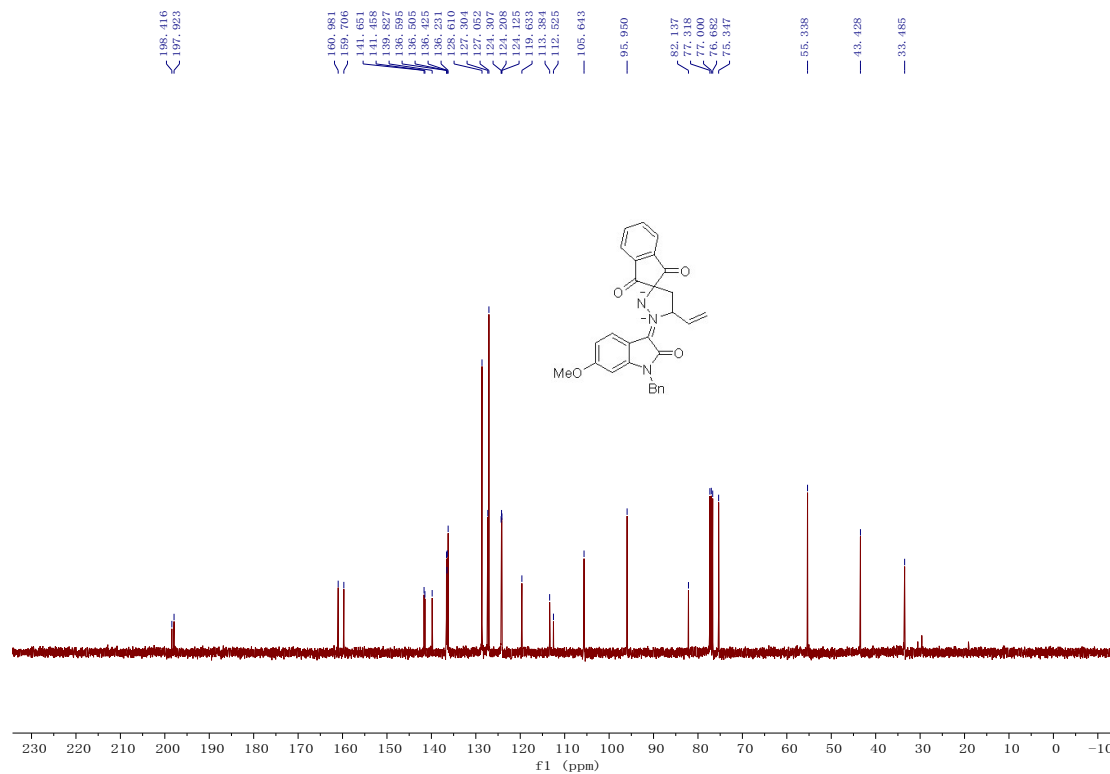

HPLC spectra:

### HPLC REPORT

Sample Name: cb-1-91-b-racemic  
 Column: IB-3  
 Velocity (mL/min): 0.7

Date: #####  
 Mobile Phase: hex/ipr = 95/5  
 Detection Wavelength (nm): 254

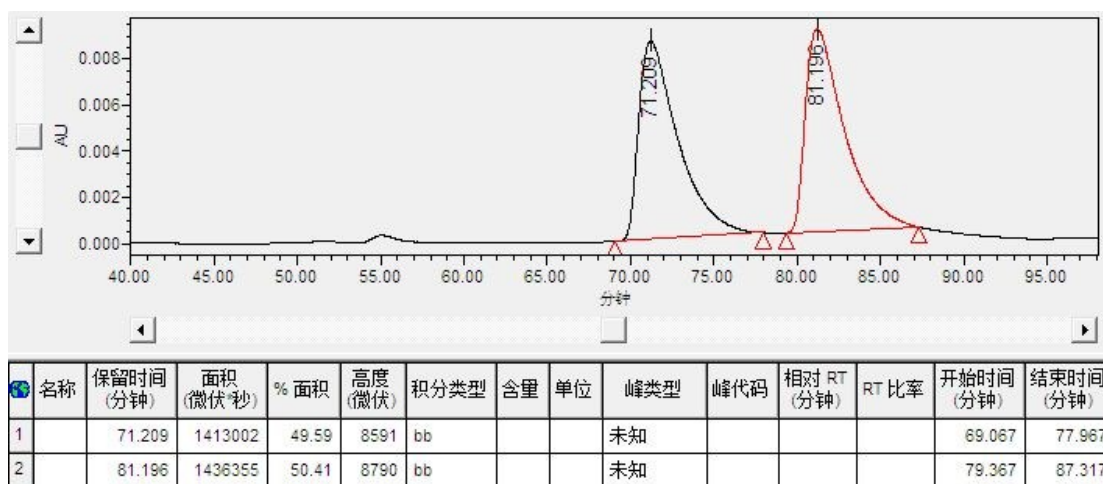

| NO | R. Time | Peak Area | Percent | Peak Height |
|----|---------|-----------|---------|-------------|
| 1  | 71.209  | 1413002   | 49.59   | 8591        |
| 2  | 81.196  | 1436355   | 50.41   | 8790        |

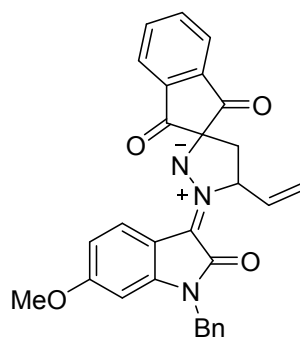

Chiral HPLC report: **3g**

### HPLC REPORT

Sample Name: cb-1-91-b-chiral  
 Column: IB-3  
 Velocity (mL/min): 0.7

Date: #####  
 Mobile Phase: hex/ipr = 95/5  
 Detection Wavelength (nm): 254

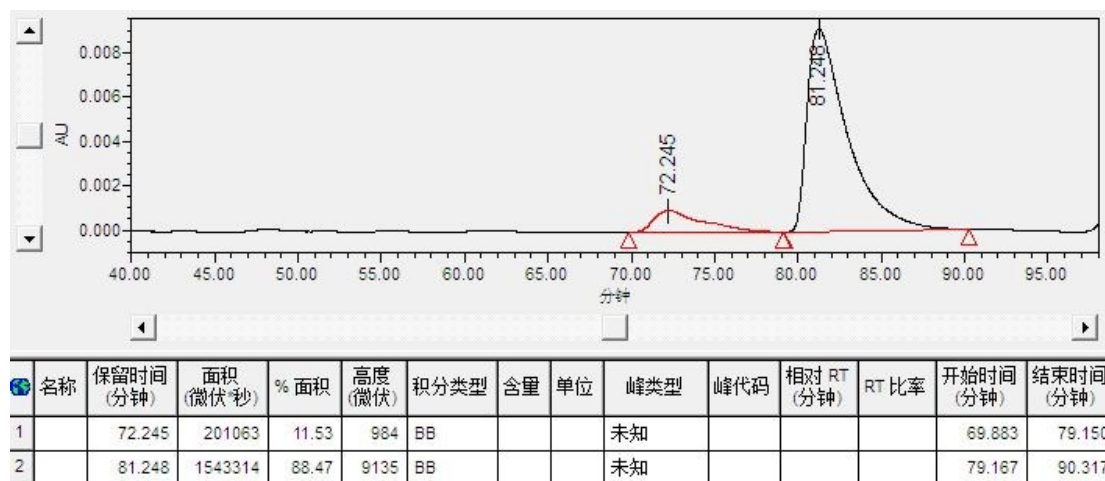

| NO | R. Time | Peak Area | Percent | Peak Height |
|----|---------|-----------|---------|-------------|
| 1  | 72.245  | 201063    | 11.53   | 984         |
| 2  | 81.248  | 1543314   | 88.47   | 9135        |

Chiral HPLC report: Enantiomeric excess was determined by HPLC with a Chiralpak IB-3 column;  $\lambda = 254 \text{ nm}$ ; eluent: Hexane/Isopropanol = 95/5; Flow rate: 0.7 mL/min;  $t_{\text{minor}} = 72.245 \text{ min}$ ,  $t_{\text{major}} = 81.248 \text{ min}$ ; ee = 78%.  $[\alpha]_{\text{D}}^{20} = -90.3$  ( $c = 0.325$ ,  $\text{CH}_2\text{Cl}_2$ ).

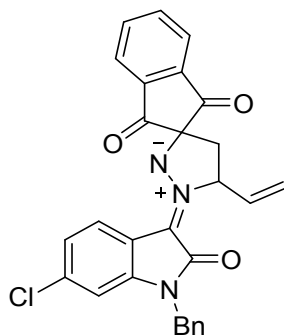

**(E)-1'-(1-benzyl-6-chloro-2-oxoindolin-3-ylidene)-1,3-dioxo-5'-vinyl-1,3-dihydrospiro[indene-2,3'-pyrazolidin]-1'-ium-2'-ide 3h**

A red solid, 96% yield (46 mg), 65% ee. M.p.: 139-140 °C.  $^1\text{H NMR}$  ( $\text{CDCl}_3$ , 400 MHz, TMS)  $\delta$  2.35 (d,  $J = 13.2 \text{ Hz}$ , 1H,  $\text{CH}_2$ ), 2.87 (dd,  $J = 9.6 \text{ Hz}$ , 13.2 Hz, 1H,  $\text{CH}_2$ ), 4.89 (d,  $J = 16.0 \text{ Hz}$ , 1H,  $\text{CH}_2$ ), 5.05 (d,  $J = 16.0 \text{ Hz}$ , 1H,  $\text{CH}_2$ ), 5.39 (d,  $J = 10.4 \text{ Hz}$ , 1H,  $=\text{CH}_2$ ), 5.73 (d,  $J = 16.8 \text{ Hz}$ , 1H,  $=\text{CH}_2$ ), 6.36 (ddd,  $J = 8.8 \text{ Hz}$ , 10.4 Hz, 16.8 Hz, 1H,  $=\text{CH}$ ), 6.68-6.74 (m, 2H, CH, ArH), 6.84 (dd,  $J = 1.6 \text{ Hz}$ , 8.0 Hz, 1H, ArH), 7.24-7.32 (m, 5H, ArH), 7.77 (d,  $J = 8.0 \text{ Hz}$ , 1H, ArH), 7.95-7.98



(m, 2H, ArH), 8.10-8.13 (m, 2H, ArH).  $^{13}\text{C}$  NMR ( $\text{CDCl}_3$ , 100 MHz, TMS)  $\delta$  33.3, 43.5, 76.2, 82.7, 108.3, 112.0, 118.2, 120.3, 121.5, 123.5, 124.3, 124.5, 127.0, 127.5, 128.7, 132.5, 135.9, 136.1, 136.7, 136.8, 138.9, 141.4, 141.6, 160.5, 197.2, 197.7. IR ( $\text{CH}_2\text{Cl}_2$ )  $\nu$  2923, 2853, 1712, 1677, 1496, 1470, 1376, 1326, 1270, 1184, 1163, 1121, 963, 724, 663  $\text{cm}^{-1}$ . HRMS (ESI) Calcd. for  $\text{C}_{28}\text{H}_{21}\text{ClN}_3\text{O}_3$  ( $\text{M}+\text{H}^+$ ), requires 482.1266, found: 482.1268.

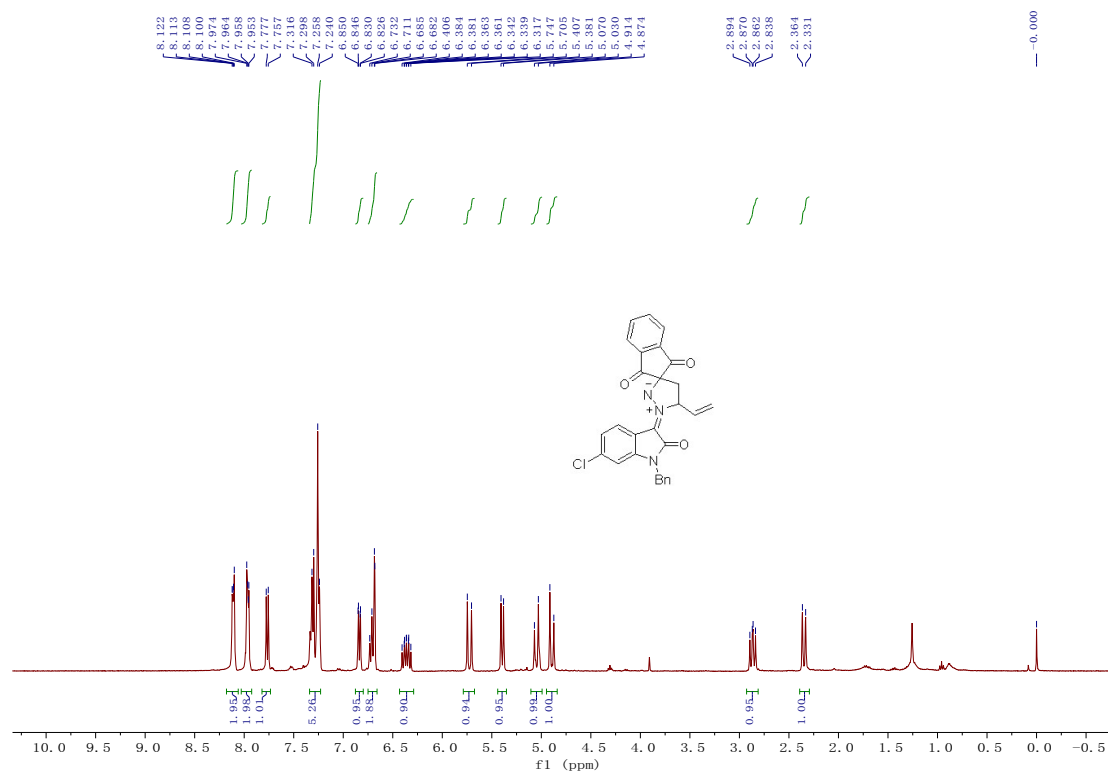

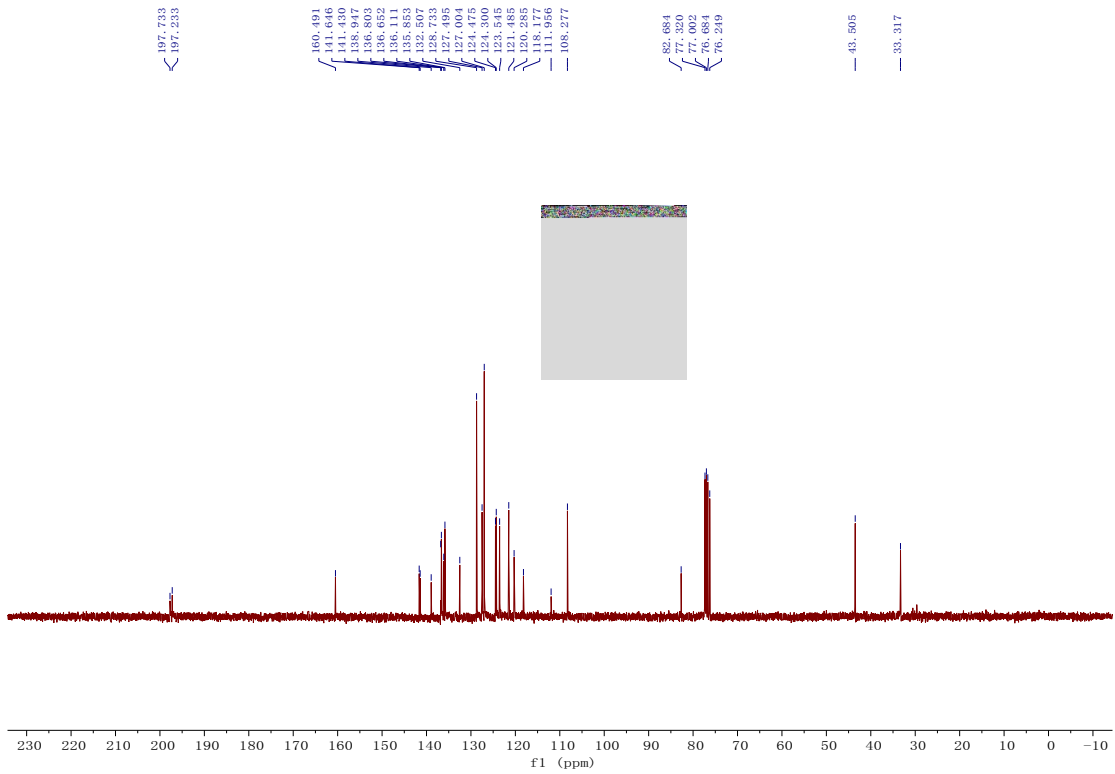

HPLC spectra:

### HPLC REPORT

Sample Name: cb-1-91-c-racemic  
 Column: IB-3  
 Velocity (mL/min): 0.7

Date: #####  
 Mobile Phase: hex/ipr = 95/5  
 Detection Wavelength (nm): 254

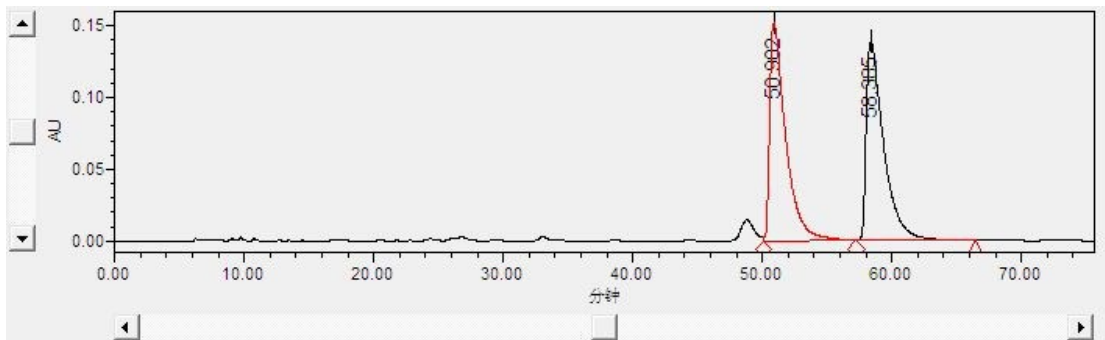

| 名称 | 保留时间 (分钟) | 面积 (微伏秒) | % 面积  | 高度 (微伏) | 积分类型 | 含量 | 单位 | 峰类型 | 峰代码 | 相对 RT (分钟) | RT 比率 | 开始时间 (分钟) | 结束时间 (分钟) |
|----|-----------|----------|-------|---------|------|----|----|-----|-----|------------|-------|-----------|-----------|
| 1  | 50.902    | 13110720 | 50.31 | 151976  | VV   |    |    | 未知  |     |            |       | 50.067    | 57.267    |
| 2  | 58.385    | 12949811 | 49.69 | 138389  | VB   |    |    | 未知  |     |            |       | 57.267    | 66.517    |

| NO | R. Time | Peak Area | Percent | Peak Height |
|----|---------|-----------|---------|-------------|
| 1  | 50.902  | 13110720  | 50.31   | 151976      |

|   |        |          |       |        |
|---|--------|----------|-------|--------|
| 2 | 58.385 | 12949911 | 49.69 | 138389 |
|---|--------|----------|-------|--------|

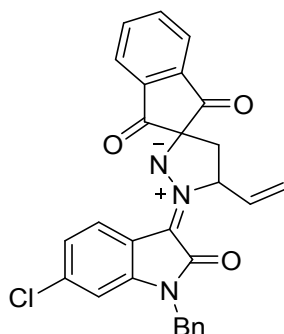

Chiral HPLC report: **3h**

### HPLC REPORT

Sample Name: cb-1-91-c-chiral

Date: #####

Column: IB-3

Mobile Phase: hex/ipr = 95/5

Velocity (mL/min): 0.7

Detection Wavelength (nm): 254

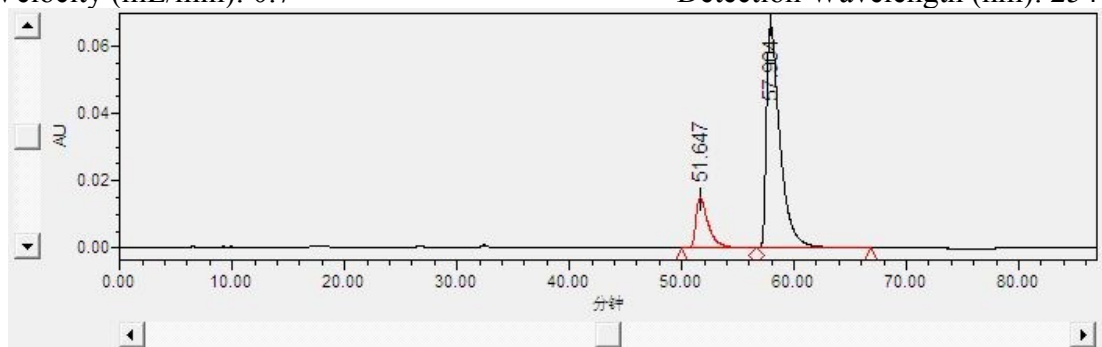

| 名称 | 保留时间 (分钟) | 面积 (微伏秒) | % 面积  | 高度 (微伏) | 积分类型 | 含量 | 单位 | 峰类型 | 峰代码 | 相对 RT (分钟) | RT 比率 | 开始时间 (分钟) | 结束时间 (分钟) |
|----|-----------|----------|-------|---------|------|----|----|-----|-----|------------|-------|-----------|-----------|
| 1  | 51.647    | 1165357  | 17.27 | 14963   | BV   |    |    | 未知  |     |            |       | 49.950    | 56.667    |
| 2  | 57.904    | 5581849  | 82.73 | 66396   | VB   |    |    | 未知  |     |            |       | 56.667    | 66.850    |

| NO | R. Time | Peak Area | Percent | Peak Height |
|----|---------|-----------|---------|-------------|
| 1  | 51.647  | 1165357   | 17.27   | 14963       |
| 2  | 57.904  | 5581849   | 82.73   | 66396       |

Chiral HPLC report: Enantiomeric excess was determined by HPLC with a Chiralpak IB-3 column;  $\lambda = 254 \text{ nm}$ ; eluent: Hexane/Isopropanol = 95/5; Flow rate: 0.7 mL/min;  $t_{\text{minor}} = 51.647 \text{ min}$ ,  $t_{\text{major}} = 57.904 \text{ min}$ ; ee = 65%.  $[\alpha]_{\text{D}}^{20} = -83.8$  (c = 0.85,  $\text{CH}_2\text{Cl}_2$ ).

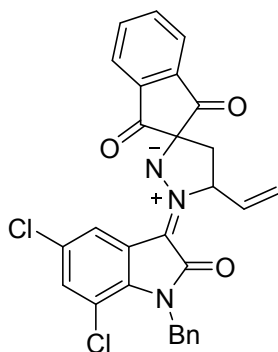

**(E)-1'-(1-benzyl-5,7-dichloro-2-oxoindolin-3-ylidene)-1,3-dioxo-5'-vinyl-1,3-dihydrospiro[indene-2,3'-pyrazolidin]-1'-ium-2'-ide 3i**

A red solid, 39% yield (20 mg), 75% ee. M.p.: 132-135 °C. <sup>1</sup>H NMR (CDCl<sub>3</sub>, 400 MHz, TMS) δ 2.34 (d, *J* = 12.8 Hz, 1H, CH<sub>2</sub>), 2.85 (dd, *J* = 9.6 Hz, 12.8 Hz, 1H, CH<sub>2</sub>), 5.37-5.44 (m, 3H, CH<sub>2</sub>, CH<sub>2</sub>, =CH), 5.73 (d, *J* = 16.8 Hz, 1H, =CH<sub>2</sub>), 6.33 (ddd, *J* = 8.4 Hz, 9.6 Hz, 18.0 Hz, 1H, =CH), 6.79 (dd, *J* = 9.6 Hz, 9.6 Hz, 1H, CH), 7.02 (d, *J* = 1.0 Hz, 1H, ArH), 7.16 (d, *J* = 7.6 Hz, 2H, ArH), 7.20-7.24 (m, 1H, ArH), 7.26-7.31 (m, 2H, ArH), 7.88 (d, *J* = 2.4 Hz, 1H, ArH), 8.00-8.03 (m, 2H, ArH), 8.13-8.16 (m, 2H, ArH). <sup>13</sup>C NMR (CDCl<sub>3</sub>, 100 MHz, TMS) δ 33.3, 44.5, 77.1, 83.0, 111.2, 114.5, 120.88, 120.95, 123.1, 124.5, 124.7, 126.2, 127.0, 127.1, 128.2, 128.5, 132.2, 135.5, 136.9, 137.1, 137.9, 141.4, 141.7, 160.8, 196.9, 197.4. IR (CH<sub>2</sub>Cl<sub>2</sub>) ν 3065, 2925, 2854, 1711, 1674, 1532, 1449, 1316, 1217, 1179, 1126, 977, 855, 726, 664 cm<sup>-1</sup>. Ms (MALDI) *m/z*: 516.1 (M+H<sup>+</sup>, 100); HRMS (MALDI) Calcd. for C<sub>28</sub>H<sub>20</sub>Cl<sub>2</sub>N<sub>3</sub>O<sub>3</sub> (M+H<sup>+</sup>), requires 516.0876, found: 516.0866.

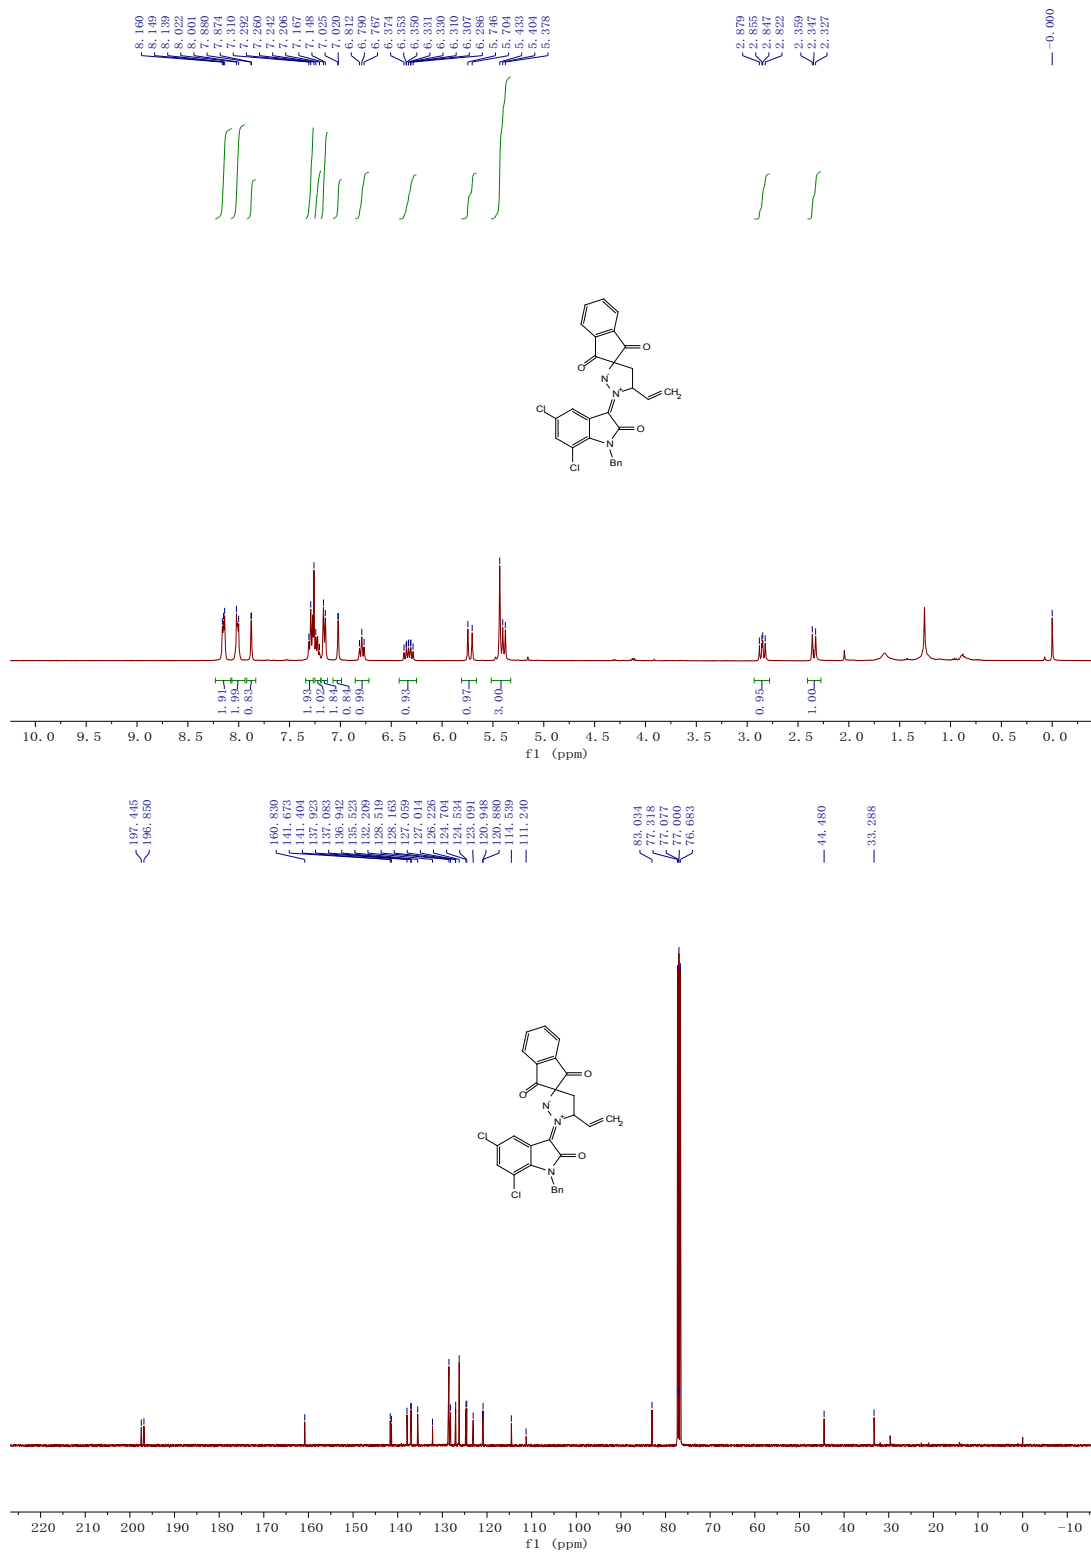

**HPLC spectra:**

**HPLC REPORT**

Sample Name: cb-1-95-a-racemic  
 Column: IB-3  
 Velocity (mL/min): 0.7

Date: #####  
 Mobile Phase: hex/iPr = 95/5  
 Detection Wavelength (nm): 254

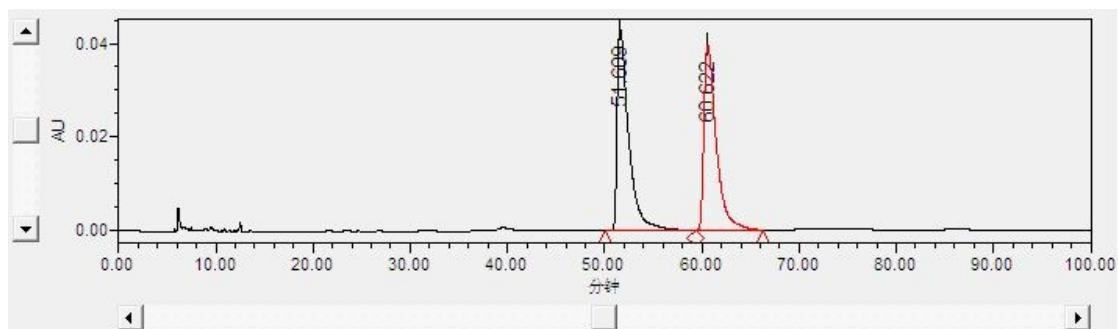

| 名称 | 保留时间 (分钟) | 面积 (微伏秒) | % 面积  | 高度 (微伏) | 积分类型 | 含量 | 单位 | 峰类型 | 峰代码 | 相对 RT (分钟) | RT 比率 | 开始时间 (分钟) | 结束时间 (分钟) |
|----|-----------|----------|-------|---------|------|----|----|-----|-----|------------|-------|-----------|-----------|
| 1  | 51.609    | 3549655  | 50.49 | 43074   | bV   |    |    | 未知  |     |            |       | 50.083    | 59.350    |
| 2  | 60.622    | 3480497  | 49.51 | 39675   | Vb   |    |    | 未知  |     |            |       | 59.350    | 66.317    |

| NO | R. Time | Peak Area | Percent | Peak Height |
|----|---------|-----------|---------|-------------|
| 1  | 51.609  | 3549655   | 50.49   | 43074       |
| 2  | 60.622  | 3480497   | 49.51   | 39675       |

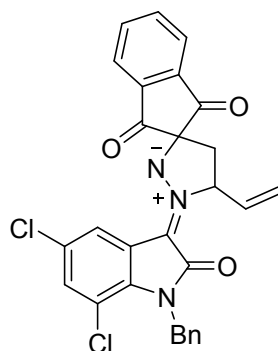

Chiral HPLC report: **3i**

### HPLC REPORT

Sample Name: cb-1-95-a-chiral  
 Column: IB-3  
 Velocity (mL/min): 0.7

Date: #####  
 Mobile Phase: hex/ipr = 95/5  
 Detection Wavelength (nm): 254

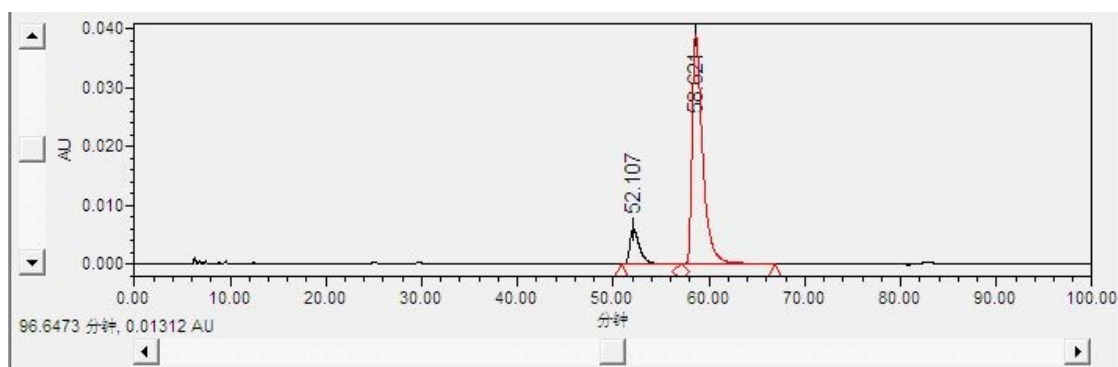

| 名称 | 保留时间 (分钟) | 面积 (微伏秒) | % 面积  | 高度 (微伏) | 积分类型 | 含量 | 单位 | 峰类型 | 峰代码 | 相对 RT (分钟) | RT 比率 | 开始时间 (分钟) | 结束时间 (分钟) |
|----|-----------|----------|-------|---------|------|----|----|-----|-----|------------|-------|-----------|-----------|
| 1  | 52.107    | 430986   | 12.56 | 6030    | BV   |    |    | 未知  |     |            |       | 50.850    | 57.050    |
| 2  | 58.621    | 2999580  | 87.44 | 38857   | VB   |    |    | 未知  |     |            |       | 57.050    | 66.900    |

| NO | R. Time | Peak Area | Percent | Peak Height |
|----|---------|-----------|---------|-------------|
| 1  | 52.107  | 430986    | 12.56   | 6030        |
| 2  | 58.621  | 2999580   | 87.44   | 38857       |

Chiral HPLC report: Enantiomeric excess was determined by HPLC with a Chiralpak IB-3 column;  $\lambda = 254 \text{ nm}$ ; eluent: Hexane/Isopropanol = 95/5; Flow rate: 0.7 mL/min;  $t_{\text{minor}} = 52.107 \text{ min}$ ,  $t_{\text{major}} = 58.621 \text{ min}$ ; ee = 75%.  $[\alpha]_{\text{D}}^{20} = -101.4$  (c = 0.40,  $\text{CH}_2\text{Cl}_2$ ).

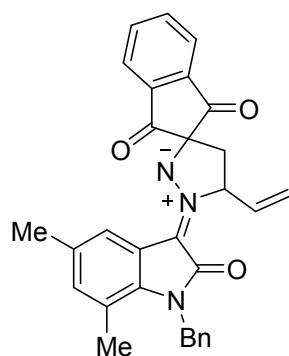

**(E)-1'-(1-benzyl-5,7-dimethyl-2-oxoindolin-3-ylidene)-1,3-dioxo-5'-vinyl-1,3-dihydrospiro[indene-2,3'-pyrazolidin]-1'-ium-2'-ide 3j**

A red solid, 80% yield (38 mg), 48% ee. M.p.: 191-193 °C.  $^1\text{H NMR}$  ( $\text{CDCl}_3$ , 400 MHz, TMS)  $\delta$  2.17 (s, 3H,  $\text{CH}_3$ ), 2.23 (s, 3H,  $\text{CH}_3$ ), 2.32 (d,  $J = 13.2 \text{ Hz}$ , 1H,  $\text{CH}_2$ ), 2.84 (dd,  $J = 9.6 \text{ Hz}$ , 12.8 Hz, 1H,  $\text{CH}_2$ ), 5.19 (d,  $J = 16.8 \text{ Hz}$ , 1H,  $\text{CH}_2$ ), 5.32-5.37 (m, 2H,  $\text{CH}_2$ ,  $=\text{CH}_2$ ), 5.67 (d,  $J = 16.8 \text{ Hz}$ , 1H,  $=\text{CH}_2$ ), 6.36 (ddd,  $J = 8.4 \text{ Hz}$ , 9.6 Hz, 18.0 Hz, 1H,  $=\text{CH}$ ), 6.65 (s, 1H, ArH), 6.82 (dd,  $J = 9.6 \text{ Hz}$ ,

9.6 Hz, 1H, CH), 7.10 (d,  $J = 7.6$  Hz, 1H, ArH), 7.18-7.23 (m, 1H, ArH), 7.26-7.31 (m, 2H, ArH), 7.70 (s, 1H, ArH), 7.96-7.99 (m, 2H, ArH), 8.12-8.14 (m, 2H, ArH).  $^{13}\text{C}$  NMR ( $\text{CDCl}_3$ , 100 MHz, TMS)  $\delta$  18.7, 20.8, 33.7, 44.8, 76.0, 82.4, 113.0, 118.2, 119.8, 120.4, 121.7, 124.3, 124.5, 125.6, 126.8, 128.7, 131.0, 132.1, 134.0, 136.2, 136.6, 136.8, 138.4, 141.4, 141.7, 161.5, 197.9, 198.5. IR ( $\text{CH}_2\text{Cl}_2$ )  $\nu$  2922, 2852, 1711, 1668, 1541, 1439, 1329, 1262, 1218, 1159, 980, 796, 732, 696  $\text{cm}^{-1}$ . HRMS (ESI) Calcd. for  $\text{C}_{30}\text{H}_{26}\text{N}_3\text{O}_3$  ( $\text{M}+\text{H}^+$ ), requires 476.1969, found: 476.1970.

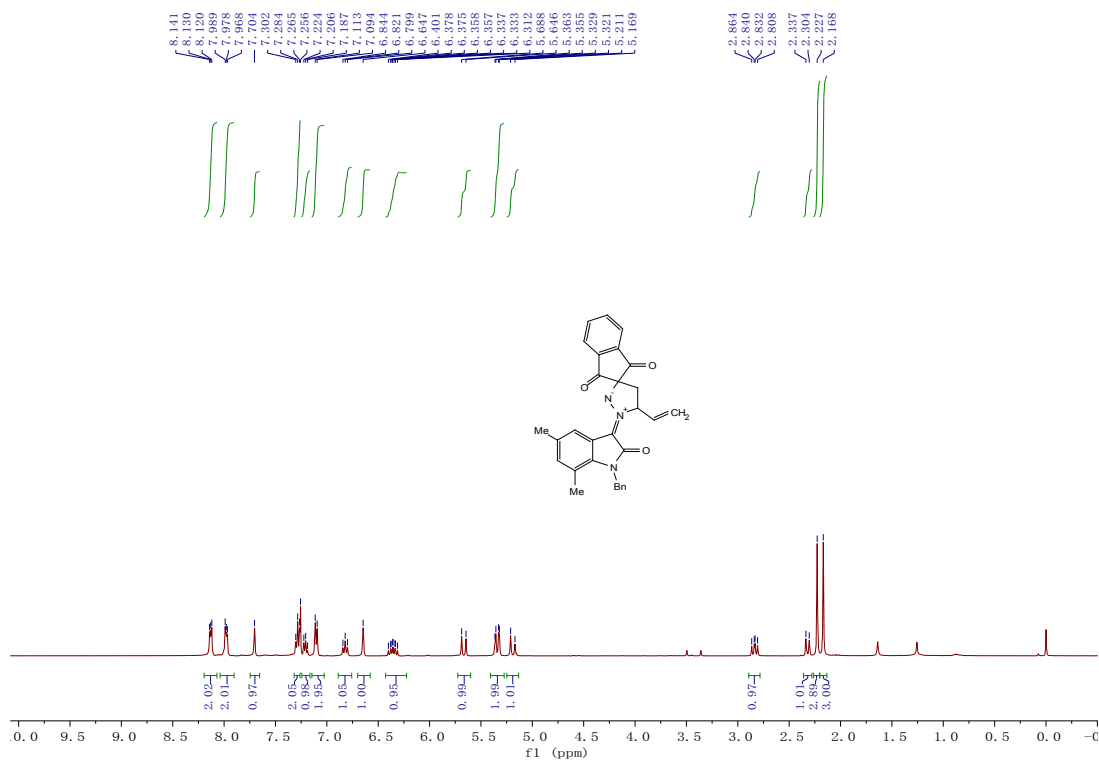



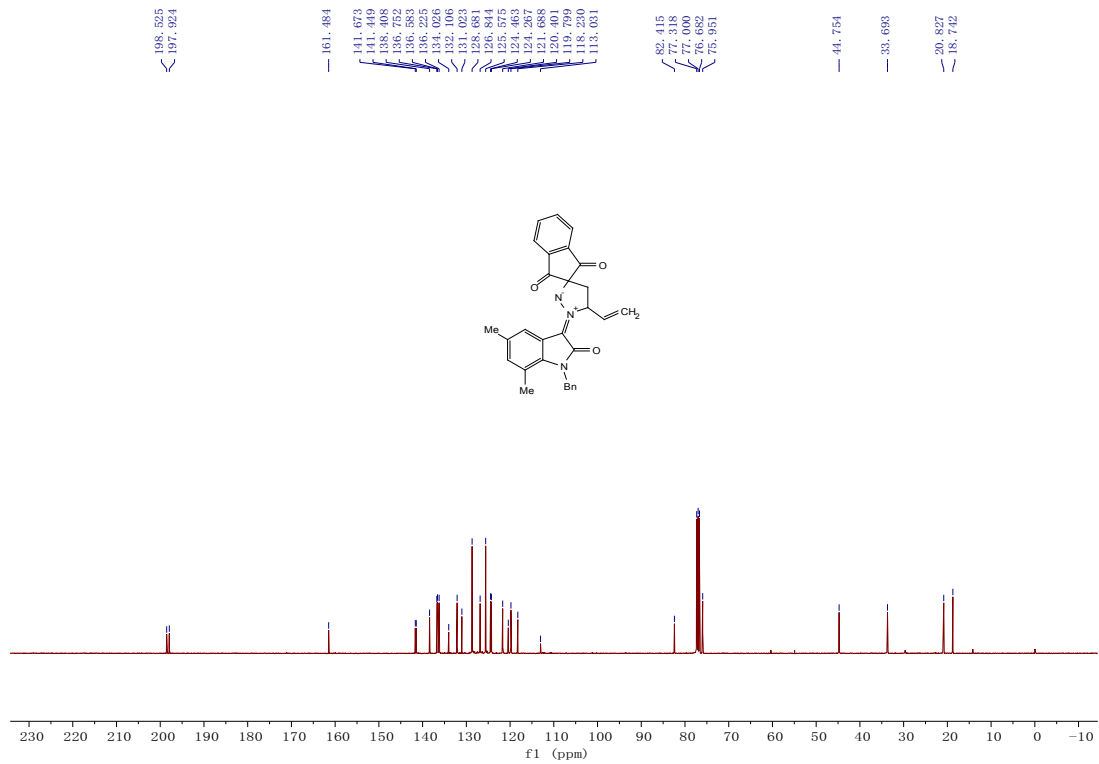

HPLC spectra:

### HPLC REPORT

Sample Name: cb-1-95-b-racemic

Date: #####

Column: id

Mobile Phase: hex/ipr = 70/30

Velocity (mL/min): 0.5

Detection Wavelength (nm): 230

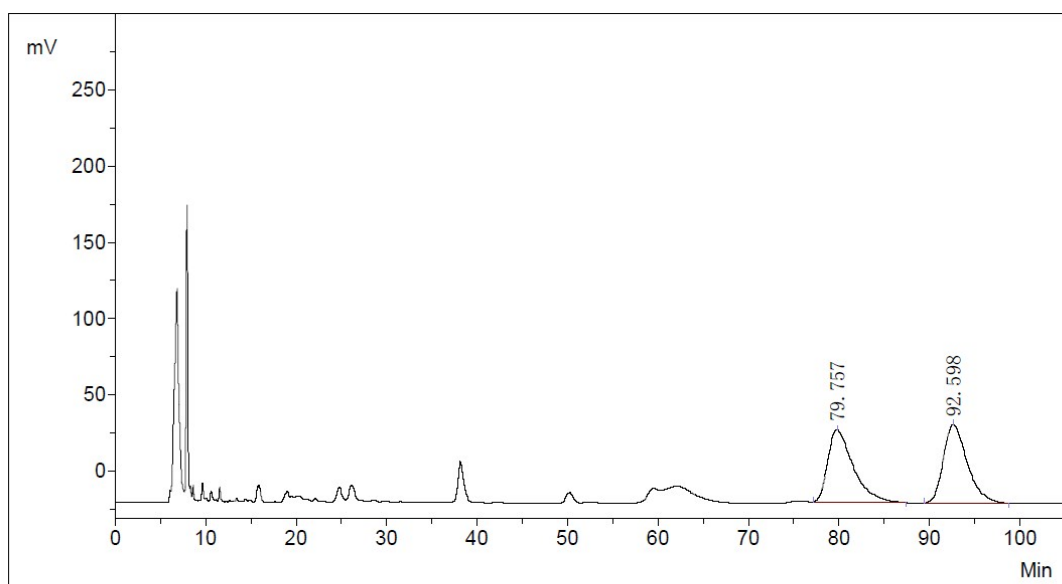

| No.   | PeakNo | ID. Name | R. Time | PeakHeight | PeakArea   | PerCent  |
|-------|--------|----------|---------|------------|------------|----------|
| 1     | 1      | Unknown  | 79.757  | 47331.6    | 9208701.5  | 49.4914  |
| 2     | 2      | Unknown  | 92.598  | 51265.0    | 9397980.6  | 50.5086  |
| Total |        |          |         | 98596.6    | 18606682.1 | 100.0000 |

| NO | R. Time | Peak Area | Percent | Peak Height |
|----|---------|-----------|---------|-------------|
| 1  | 79.757  | 9208702   | 49.49   | 47332       |
| 2  | 92.598  | 9397981   | 50.51   | 51265       |

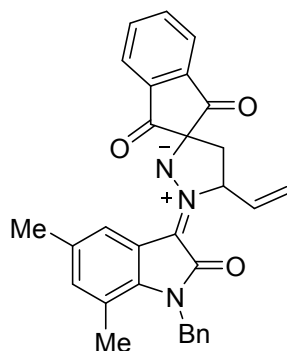

Chiral HPLC report: **3j**

### HPLC REPORT

Sample Name: cb-1-95-b-chiral  
Column: id

Date: #####  
Mobile Phase: hex/iPr = 70/30

Velocity (mL/min): 0.5

Detection Wavelength (nm): 230

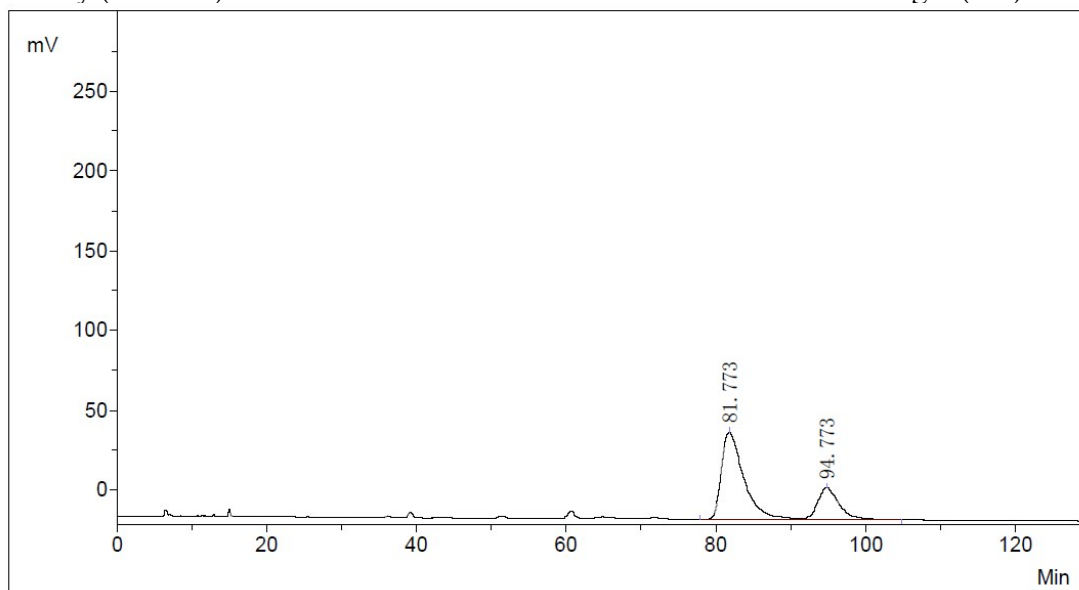

| No.   | PeakNo | ID. Name | R. Time | PeakHeight | PeakArea   | PerCent  |
|-------|--------|----------|---------|------------|------------|----------|
| 1     | 1      | Unknown  | 81.773  | 55066.0    | 11349098.8 | 74.2182  |
| 2     | 2      | Unknown  | 94.773  | 19805.0    | 3942436.6  | 25.7818  |
| Total |        |          |         | 74871.0    | 15291535.4 | 100.0000 |

| NO | R. Time | Peak Area | Percent | Peak Height |
|----|---------|-----------|---------|-------------|
| 1  | 81.773  | 11349099  | 74.22   | 55066       |
| 2  | 94.773  | 19805     | 25.78   | 19805       |

Chiral HPLC report: Enantiomeric excess was determined by HPLC with a Chiralpak id column;  $\lambda = 230$  nm; eluent: Hexane/Isopropanol = 70/30; Flow rate: 0.5 mL/min;  $t_{\text{minor}} = 94.773$  min,  $t_{\text{major}} = 81.773$  min; ee = 48%.  $[\alpha]_{\text{D}}^{20} = -45.0$  (c = 0.55,  $\text{CH}_2\text{Cl}_2$ ).

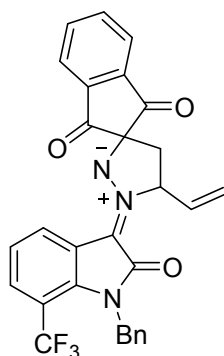

**(E)-1'-(1-benzyl-2-oxo-7-(trifluoromethyl)indolin-3-ylidene)-1,3-dioxo-5'-vinyl-1,3-dihydrospiro[indene-2,3'-pyrazolidin]-1'-ium-2'-ide 3k**

A red solid, 52% yield (27 mg), 68% ee. M.p.: 126-128 °C. <sup>1</sup>H NMR (CDCl<sub>3</sub>, 400 MHz, TMS) δ 2.34 (d, *J* = 13.2 Hz, 1H, CH<sub>2</sub>), 2.86 (dd, *J* = 9.6 Hz, 13.2 Hz, 1H, CH<sub>2</sub>), 5.26 (d, *J* = 17.2 Hz, 1H, CH<sub>2</sub>), 5.33-5.38 (m, 2H, CH<sub>2</sub>, =CH<sub>2</sub>), 5.71 (d, *J* = 16.8 Hz, 1H, =CH<sub>2</sub>), 6.28-6.38 (m, 1H, =CH), 6.81 (dd, *J* = 9.6 Hz, 9.6 Hz, 1H, CH), 6.99 (dd, *J* = 8.0 Hz, 8.0 Hz, 1H, ArH), 7.05 (d, *J* = 7.2 Hz, 2H, ArH), 7.16-7.21 (m, 1H, ArH), 7.25-7.29 (m, 2H, ArH), 7.40 (d, *J* = 8.0 Hz, 1H, ArH), 7.98-8.01 (m, 2H, ArH), 8.13-8.16 (m, 2H, ArH), 8.24 (d, *J* = 7.6 Hz, 1H, ArH). <sup>13</sup>C NMR (CDCl<sub>3</sub>, 100 MHz, TMS) δ 33.0, 45.2 (q, *J* = 4.8 Hz), 77.2, 83.1, 111.2, 111.5 (q, *J* = 32.4 Hz), 120.8, 120.9, 122.1, 122.3, 123.6, (q, *J* = 270.3 Hz), 124.4, 124.6, 124.7 (q, *J* = 6.1 Hz), 125.5, 126.0, 126.6, 128.3, 135.4, 135.6, 136.8, 137.0, 137.1, 141.4, 141.7, 161.3, 196.9, 197.5. <sup>19</sup>F NMR (CDCl<sub>3</sub>, 376 MHz, CFCl<sub>3</sub>) δ -55.0. IR (CH<sub>2</sub>Cl<sub>2</sub>) ν 3028, 2964, 2925, 1711, 1679, 1537, 1448, 1426, 1326, 1261, 1116, 1091, 1018, 795, 739, 718 cm<sup>-1</sup>. HRMS (ESI) Calcd. for C<sub>29</sub>H<sub>21</sub>F<sub>3</sub>N<sub>3</sub>O<sub>3</sub> (M+H<sup>+</sup>), requires 516.1530, found: 516.1526.

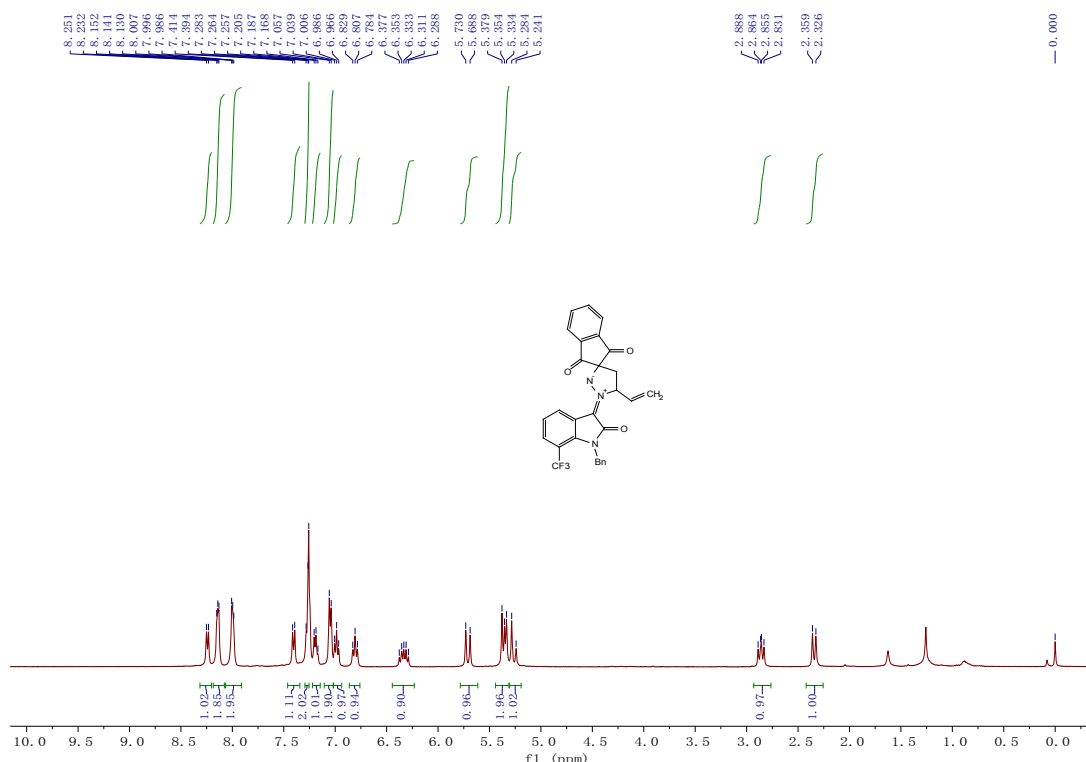

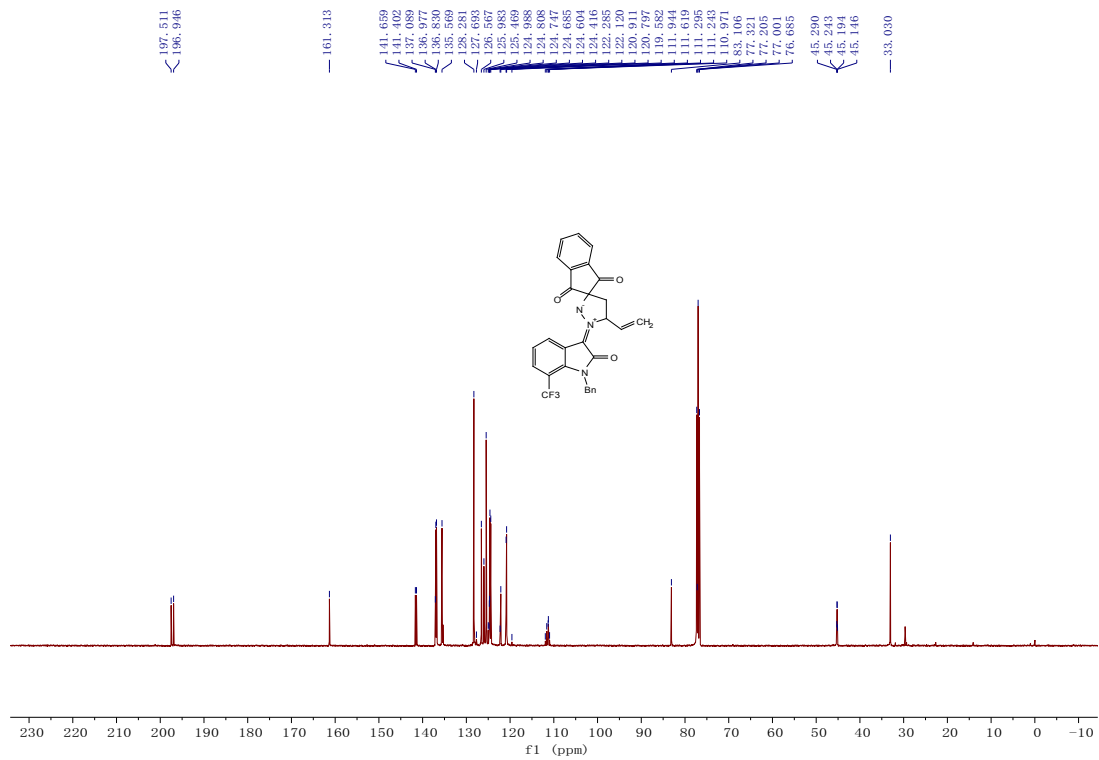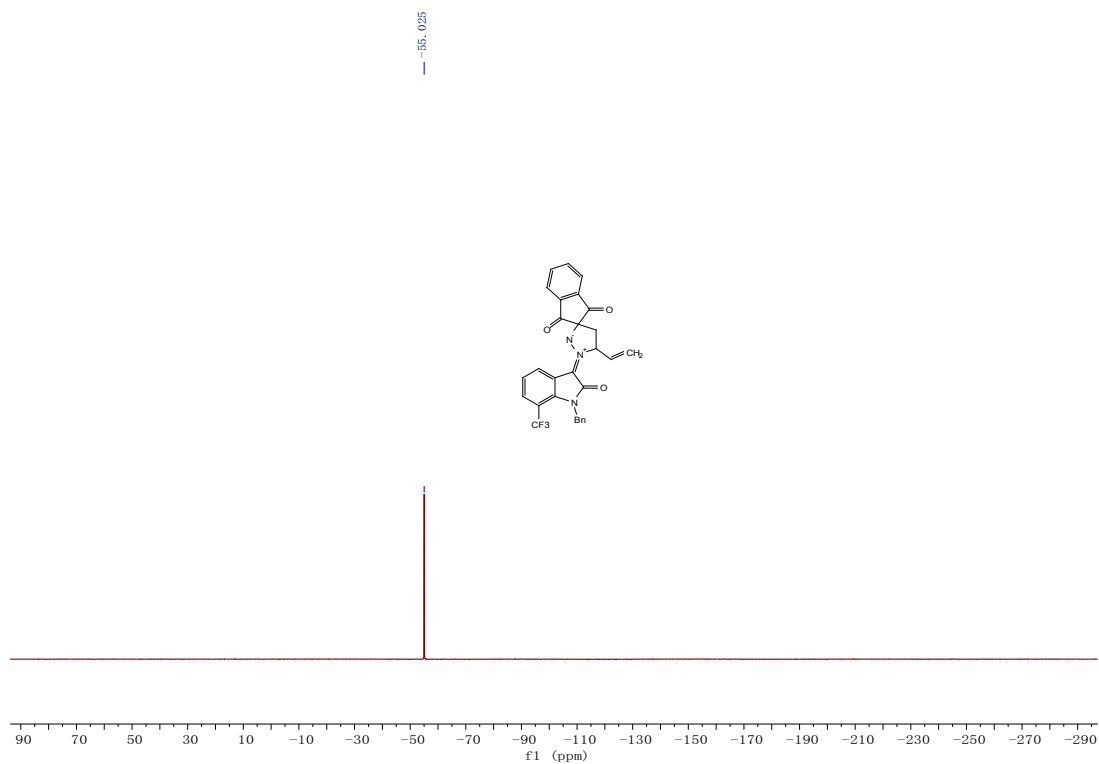

**HPLC spectra:**

**HPLC REPORT**

Sample Name: cb-1-95-c-racemic  
 Column: IB-3

Date: #####  
 Mobile Phase: hex/ipr = 95/5

Velocity (mL/min): 0.7

Detection Wavelength (nm): 254

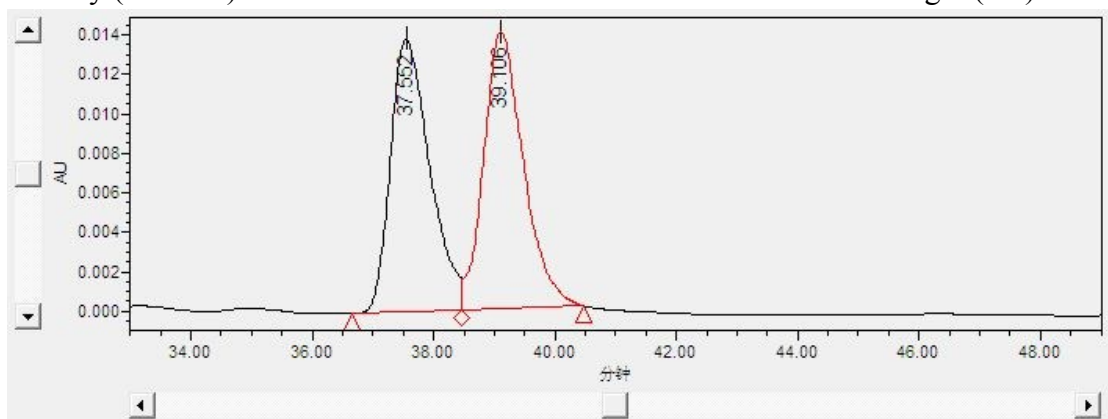

| 名称 | 保留时间 (分钟) | 面积 (微伏·秒) | % 面积  | 高度 (微伏) | 积分类型 | 含量 | 单位 | 峰类型 | 峰代码 | 相对 RT (分钟) | RT 比率 | 开始时间 (分钟) | 结束时间 (分钟) |
|----|-----------|-----------|-------|---------|------|----|----|-----|-----|------------|-------|-----------|-----------|
| 1  | 37.552    | 621602    | 49.15 | 13840   | BV   |    |    | 未知  |     |            |       | 36.667    | 38.467    |
| 2  | 39.106    | 643152    | 50.85 | 14039   | Vb   |    |    | 未知  |     |            |       | 38.467    | 40.483    |

| NO | R. Time | Peak Area | Percent | Peak Height |
|----|---------|-----------|---------|-------------|
| 1  | 37.552  | 621602    | 49.15   | 13840       |
| 2  | 39.106  | 643152    | 50.85   | 14039       |

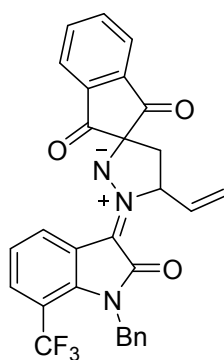

Chiral HPLC report: **3k**

### HPLC REPORT

Sample Name: cb-1-95-c-chiral

Column: IB-3

Velocity (mL/min): 0.7

Date: #####

Mobile Phase: hex/ipr = 95/5

Detection Wavelength (nm): 254

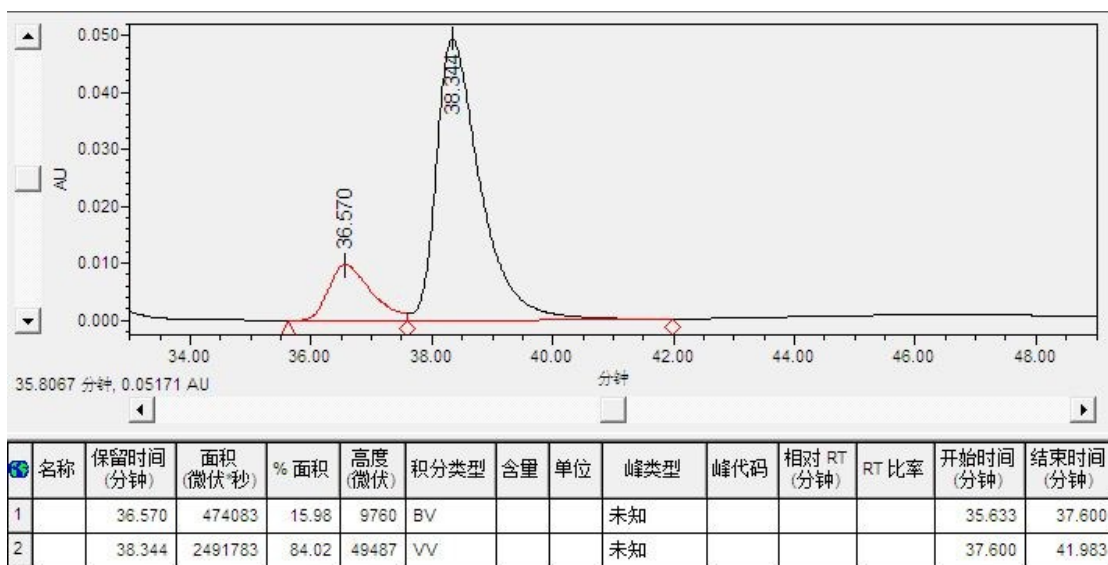

| NO | R. Time | Peak Area | Percent | Peak Height |
|----|---------|-----------|---------|-------------|
| 1  | 36.570  | 474083    | 15.98   | 9760        |
| 2  | 38.344  | 2491783   | 84.02   | 49487       |

Chiral HPLC report: Enantiomeric excess was determined by HPLC with a Chiralpak IB-3 column;  $\lambda = 254 \text{ nm}$ ; eluent: Hexane/Isopropanol = 95/5; Flow rate: 0.7 mL/min;  $t_{\text{minor}} = 36.570 \text{ min}$ ,  $t_{\text{major}} = 38.344 \text{ min}$ ; ee = 68%.  $[\alpha]_{\text{D}}^{20} = -38.7$  (c = 0.950,  $\text{CH}_2\text{Cl}_2$ ).

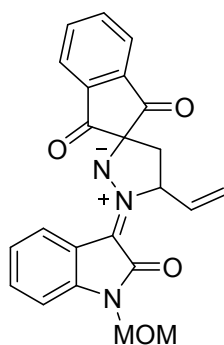

**(E)-1'-(1-(methoxymethyl)-2-oxoindolin-3-ylidene)-1,3-dioxo-5'-vinyl-1,3-dihydrospiro[indene-2,3'-pyrazolidin]-1'-ium-2'-ide 3l**

A red solid, 65% yield (26 mg), 77% ee. M.p.: 182-184 °C.  $^1\text{H NMR}$  ( $\text{CDCl}_3$ , 400 MHz, TMS)  $\delta$  2.34 (d,  $J = 12.8 \text{ Hz}$ , 1H,  $\text{CH}_2$ ), 2.86 (dd,  $J = 9.6 \text{ Hz}$ , 12.8 Hz, 1H,  $\text{CH}_2$ ), 3.33 (s, 3H,  $\text{CH}_3$ ), 5.19 (d,  $J = 11.2 \text{ Hz}$ , 1H,  $\text{CH}_2$ ), 5.26 (d,  $J = 11.2 \text{ Hz}$ , 1H,  $\text{CH}_2$ ), 5.36 (d,  $J = 10.0 \text{ Hz}$ , 1H,  $=\text{CH}_2$ ), 5.69 (d,  $J = 16.8 \text{ Hz}$ , 1H,  $=\text{CH}_2$ ), 6.29-6.38 (m, 1H,  $=\text{CH}$ ), 6.70 (dd,  $J = 9.6 \text{ Hz}$ , 9.6 Hz, 1H, CH), 6.93-7.02

(m, 2H, ArH), 7.17 (dd,  $J = 7.6$  Hz, 7.6 Hz, 1H, ArH), 7.88 (d,  $J = 7.6$  Hz, 1H, ArH), 7.97-7.99 (m, 2H, ArH), 8.10-8.14 (m, 2H, ArH).  $^{13}\text{C}$  NMR ( $\text{CDCl}_3$ , 100 MHz, TMS)  $\delta$  33.3, 56.0, 71.0, 76.2, 77.2, 82.6, 108.2, 119.6, 120.1, 122.1, 122.9, 124.3, 124.5, 127.4, 136.0, 136.6, 136.8, 137.3, 141.5, 141.7, 160.8, 197.4, 197.9. IR ( $\text{CH}_2\text{Cl}_2$ )  $\nu$  2924, 2853, 2360, 1712, 1677, 1540, 1465, 1344, 1214, 1189, 1083, 915, 761, 721, 670  $\text{cm}^{-1}$ . HRMS (ESI) Calcd. for  $\text{C}_{23}\text{H}_{20}\text{N}_3\text{O}_4$  ( $\text{M}^+\text{H}^+$ ), requires 402.1448, found: 402.1449.

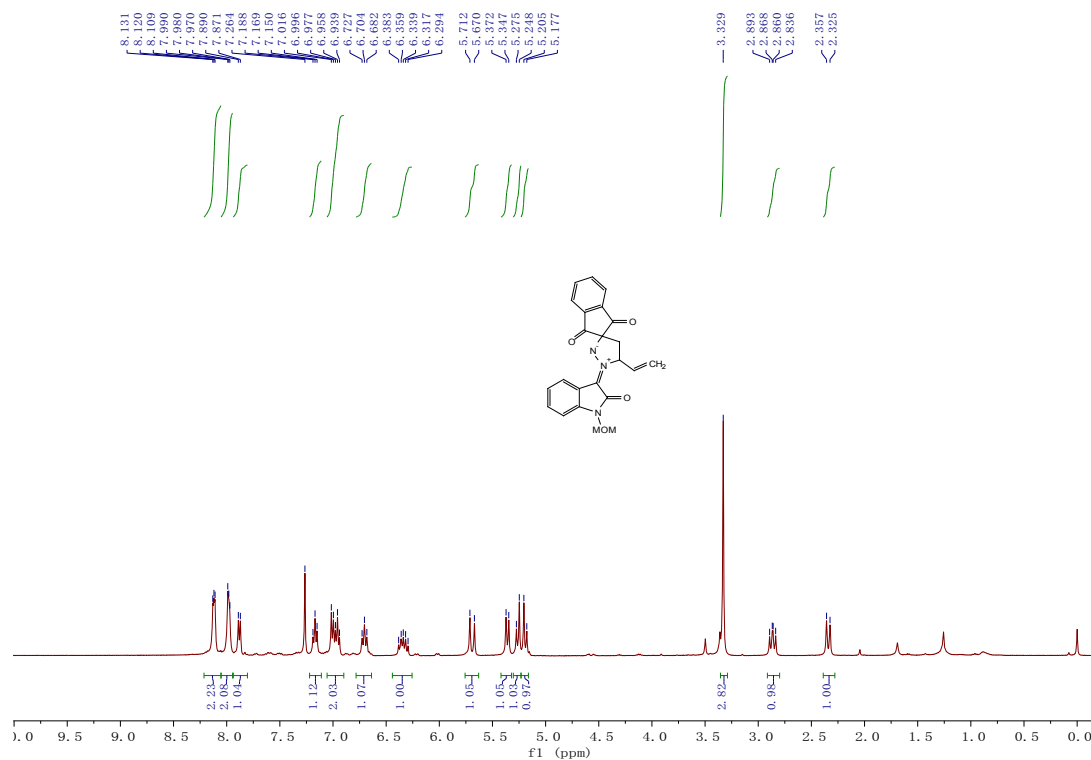



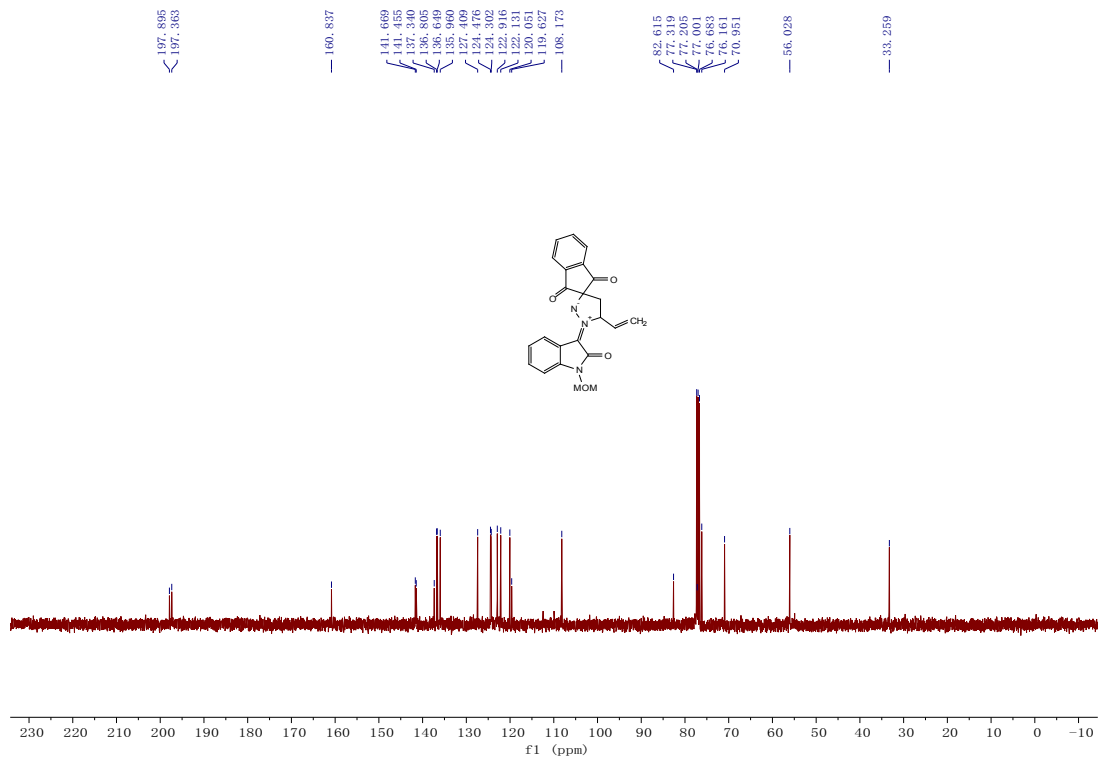

HPLC spectra:

### HPLC REPORT

Sample Name: cb-2-3-b-racemic  
 Column: ad-h  
 Velocity (mL/min): 0.5

Date: #####  
 Mobile Phase: hex/ipr = 80/20  
 Detection Wavelength (nm): 230

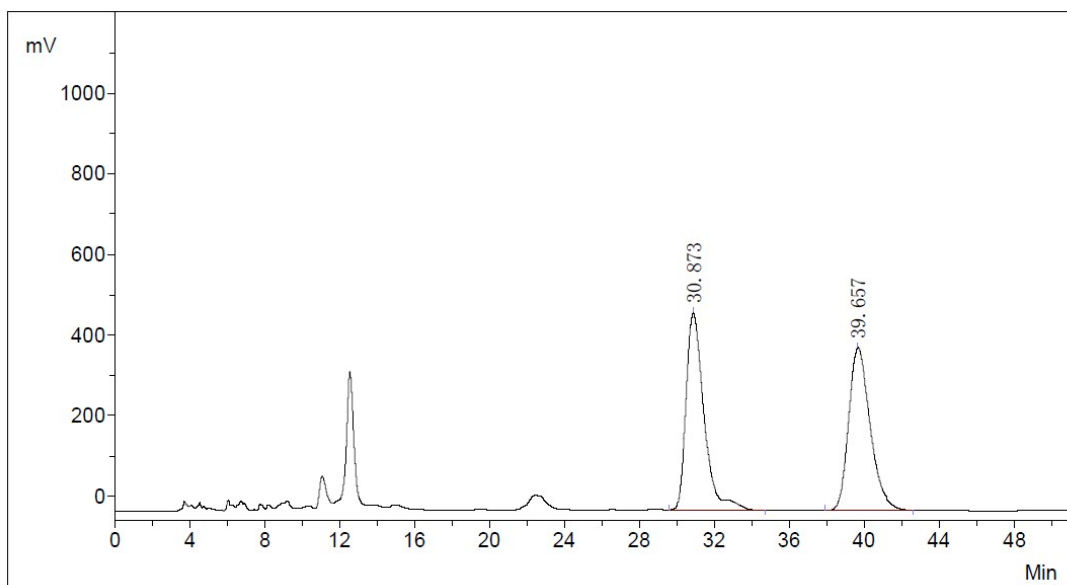

| No.   | PeakNo | ID. Name | R. Time | PeakHeight | PeakArea   | PerCent  |
|-------|--------|----------|---------|------------|------------|----------|
| 1     | 1      | Unknown  | 30.873  | 490002.8   | 32454721.3 | 50.3317  |
| 2     | 2      | Unknown  | 39.657  | 404152.1   | 32026965.9 | 49.6683  |
| Total |        |          |         | 894155.0   | 64481687.2 | 100.0000 |

| NO | R. Time | Peak Area | Percent | Peak Height |
|----|---------|-----------|---------|-------------|
| 1  | 30.873  | 32454721  | 50.33   | 490003      |
| 2  | 39.657  | 32026966  | 49.67   | 404152      |

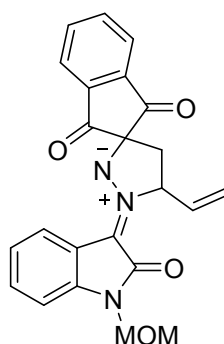

Chiral HPLC report: **3I**

### HPLC REPORT

Sample Name: cb-2-3-b-chiral  
 Column: ad-h

Date: #####  
 Mobile Phase: hex/ipr = 80/20

Velocity (mL/min): 0.5

Detection Wavelength (nm): 230

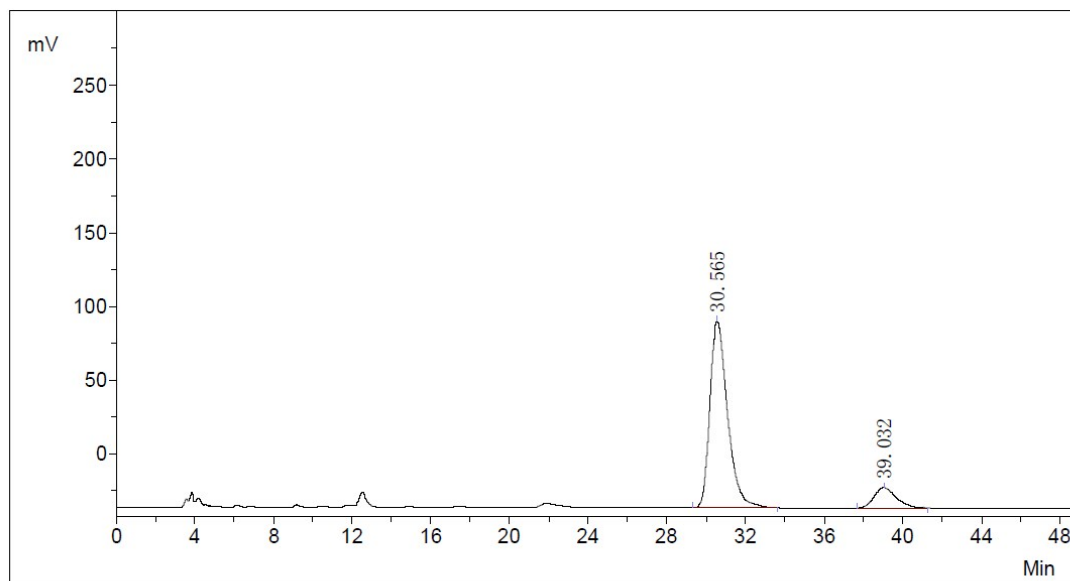

| No.   | PeakNo | ID. Name | R. Time | PeakHeight | PeakArea  | PerCent  |
|-------|--------|----------|---------|------------|-----------|----------|
| 1     | 1      | Unknown  | 30.565  | 126359.0   | 7849555.3 | 88.3955  |
| 2     | 2      | Unknown  | 39.032  | 13519.5    | 1030481.0 | 11.6045  |
| Total |        |          |         | 139878.4   | 8880036.3 | 100.0000 |

| NO | R. Time | Peak Area | Percent | Peak Height |
|----|---------|-----------|---------|-------------|
| 1  | 30.565  | 7849555   | 88.40   | 126359      |
| 2  | 39.032  | 10304813  | 11.60   | 13520       |

Chiral HPLC report: Enantiomeric excess was determined by HPLC with a Chiralpak ad-h column;  $\lambda = 230$  nm; eluent: Hexane/Isopropanol = 80/20; Flow rate: 0.5 mL/min;  $t_{\text{minor}} = 39.032$  min,  $t_{\text{major}} = 30.565$  min; ee = 77%.  $[\alpha]_{\text{D}}^{20} = -100.4$  (c = 0.575,  $\text{CH}_2\text{Cl}_2$ ).

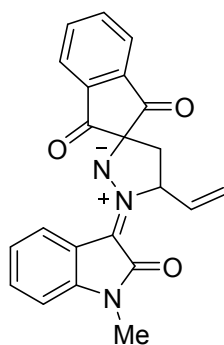

**(E)-1'-(1-methyl-2-oxoindolin-3-ylidene)-1,3-dioxo-5'-vinyl-1,3-dihydrospiro[indene-2,3'-pyrazolidin]-1'-ium-2'-ide 3m**

A red solid, 81% yield (30 mg), 84% ee. M.p.: 174-175 °C. <sup>1</sup>H NMR (CDCl<sub>3</sub>, 400 MHz, TMS) δ 2.33 (d, *J* = 12.8 Hz, 1H, CH<sub>2</sub>), 2.85 (dd, *J* = 9.6 Hz, 12.8 Hz, 1H, CH<sub>2</sub>), 3.29 (s, 3H, CH<sub>3</sub>), 5.37 (d, *J* = 10.4 Hz, 1H, =CH<sub>2</sub>), 5.69 (d, *J* = 16.8 Hz, 1H, =CH<sub>2</sub>), 6.30-6.39 (m, 1H, =CH), 6.69 (dd, *J* = 9.6 Hz, 9.6 Hz, 1H, CH), 6.79 (d, *J* = 7.6 Hz, 1H, ArH), 6.91 (dd, *J* = 7.6 Hz, 7.6 Hz, 1H, ArH), 7.15 (dd, *J* = 7.6 Hz, 7.6 Hz, 1H, ArH), 7.84 (d, *J* = 8.0 Hz, 1H, ArH), 7.94-7.97 (m, 2H, ArH), 8.09-8.11 (m, 2H, ArH). <sup>13</sup>C NMR (CDCl<sub>3</sub>, 100 MHz, TMS) δ 26.0, 33.3, 75.9, 77.2, 82.4, 106.9, 119.4, 119.9, 121.5, 122.9, 124.2, 124.4, 127.2, 136.1, 136.6, 136.7, 138.9, 141.4, 141.6, 160.6, 197.6, 198.0. IR (CH<sub>2</sub>Cl<sub>2</sub>) ν 3057, 2955, 2925, 1709, 1668, 1538, 1469, 1353, 1212, 1022, 984, 913, 758, 736, 666 cm<sup>-1</sup>. HRMS (ESI) Calcd. for C<sub>22</sub>H<sub>18</sub>N<sub>3</sub>O<sub>3</sub> (M+H<sup>+</sup>), requires 372.1343, found: 372.1343.

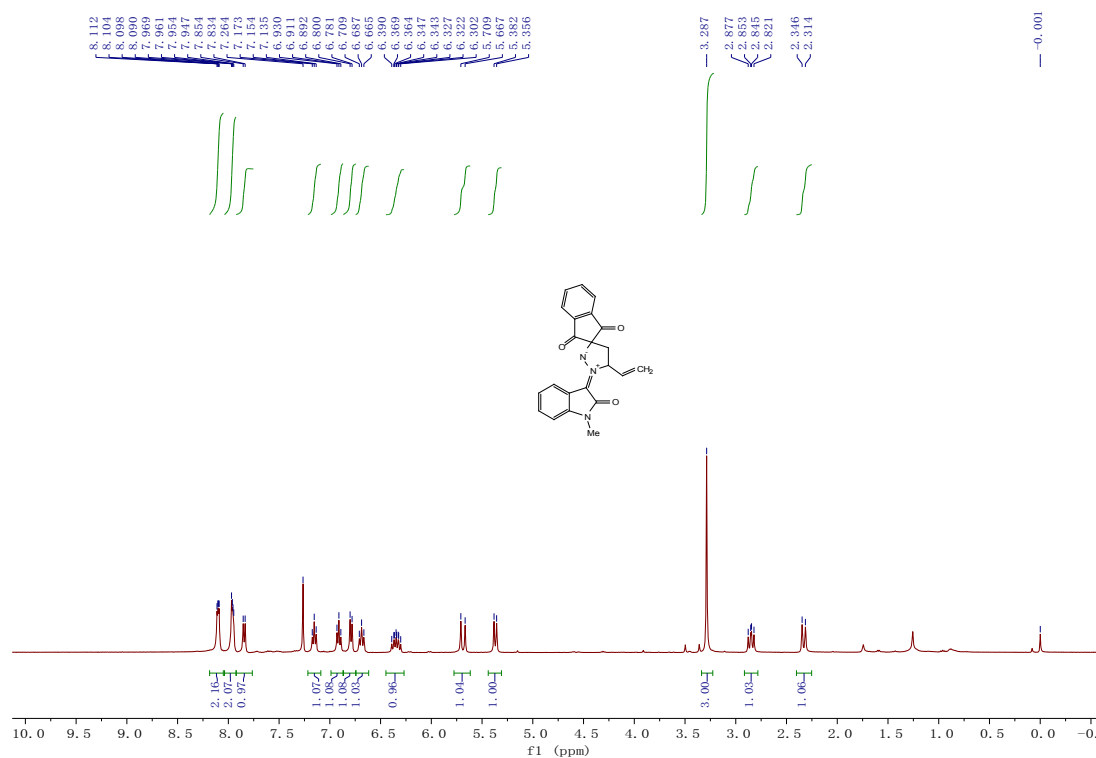

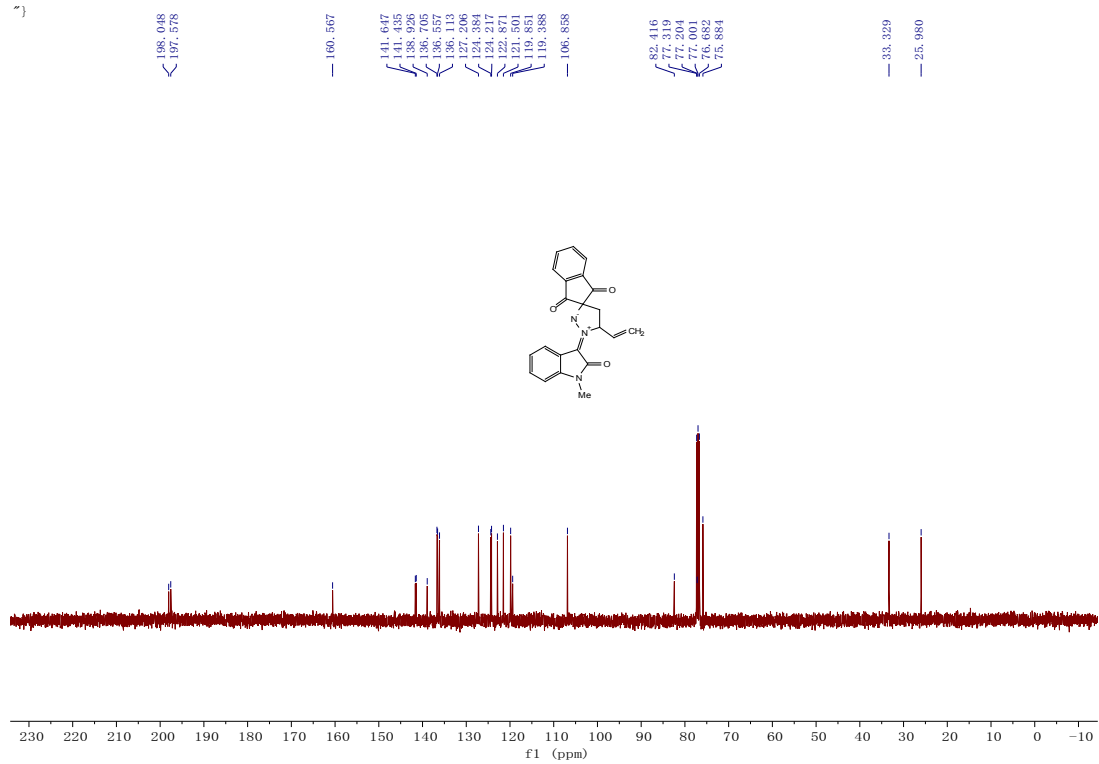

HPLC spectra:

### HPLC REPORT

Sample Name: cb-2-3-c-racemic

Date: ####

Column: IB-3

Mobile Phase: hex/ipr = 95/5

Velocity (mL/min): 0.7

Detection Wavelength (nm): 254

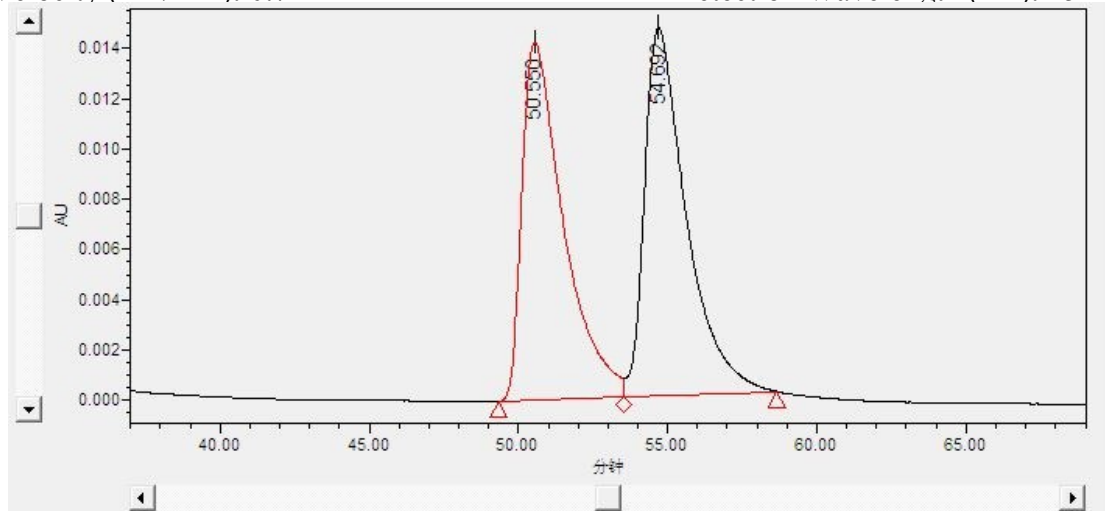

| 名称 | 保留时间 (分钟) | 面积 (微伏秒) | % 面积  | 高度 (微伏) | 积分类型 | 含量 | 单位 | 峰类型 | 峰代码 | 相对 RT (分钟) | RT 比率 | 开始时间 (分钟) | 结束时间 (分钟) |
|----|-----------|----------|-------|---------|------|----|----|-----|-----|------------|-------|-----------|-----------|
| 1  | 50.550    | 1377973  | 49.14 | 14217   | BV   |    |    | 未知  |     |            |       | 49.333    | 53.533    |
| 2  | 54.692    | 1426476  | 50.86 | 14626   | VB   |    |    | 未知  |     |            |       | 53.533    | 58.667    |

| NO | R. Time | Peak Area | Percent | Peak Height |
|----|---------|-----------|---------|-------------|
|----|---------|-----------|---------|-------------|

|   |        |         |       |       |
|---|--------|---------|-------|-------|
| 1 | 50.550 | 1377973 | 49.14 | 14217 |
| 2 | 54.692 | 1426476 | 50.86 | 14626 |

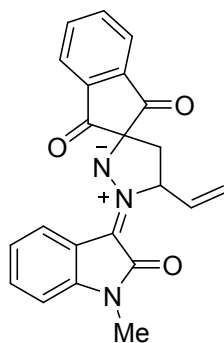

Chiral HPLC report: **3m**

### HPLC REPORT

Sample Name: cb-2-3-c-chiral

Date: #####

Column: IB-3

Mobile Phase: hex/ipr = 95/5

Velocity (mL/min): 0.7

Detection Wavelength (nm): 254

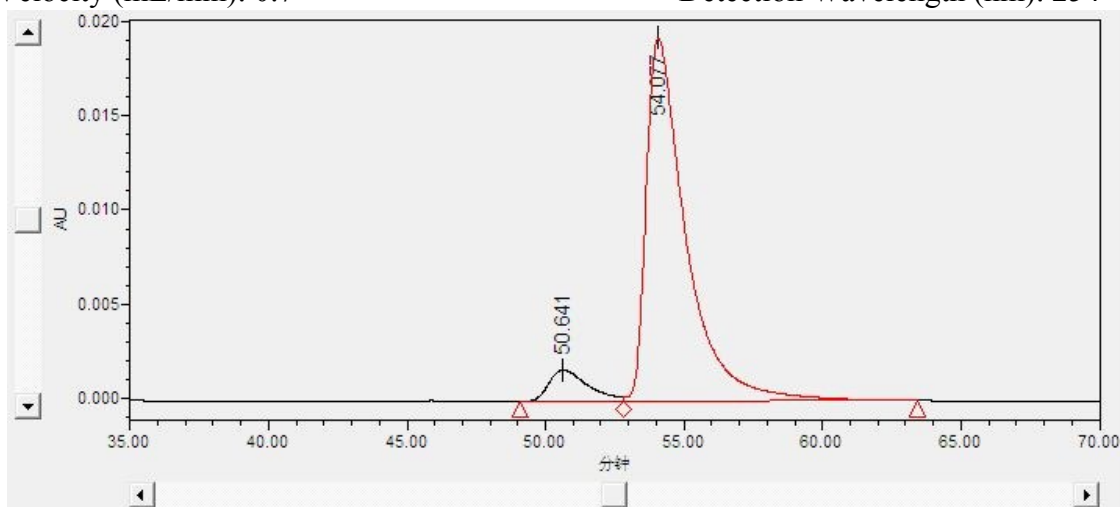

| 名称 | 保留时间 (分钟) | 面积 (微伏秒) | % 面积  | 高度 (微伏) | 积分类型 | 含量 | 单位 | 峰类型 | 峰代码 | 相对 RT (分钟) | RT 比率 | 开始时间 (分钟) | 结束时间 (分钟) |
|----|-----------|----------|-------|---------|------|----|----|-----|-----|------------|-------|-----------|-----------|
| 1  | 50.641    | 164942   | 7.86  | 1680    | BV   |    |    | 未知  |     |            |       | 49.100    | 52.800    |
| 2  | 54.077    | 1934608  | 92.14 | 19281   | VB   |    |    | 未知  |     |            |       | 52.800    | 63.417    |

| NO | R. Time | Peak Area | Percent | Peak Height |
|----|---------|-----------|---------|-------------|
| 1  | 50.641  | 164942    | 7.86    | 1680        |
| 2  | 54.077  | 1934608   | 92.14   | 19281       |

Chiral HPLC report: Enantiomeric excess was determined by HPLC with a Chiralpak IB-3 column;  $\lambda = 254 \text{ nm}$ ; eluent: Hexane/Isopropanol = 95/5; Flow rate: 0.7 mL/min;  $t_{\text{minor}} = 50.641 \text{ min}$ ,  $t_{\text{major}} = 54.077 \text{ min}$ ; ee = 84%.  $[\alpha]_{\text{D}}^{20} = -113.5$  ( $c = 0.420$ ,  $\text{CH}_2\text{Cl}_2$ ).

## 8. General procedure for the synthesis of **5** and their characterization and spectra charts containing HPLC traces

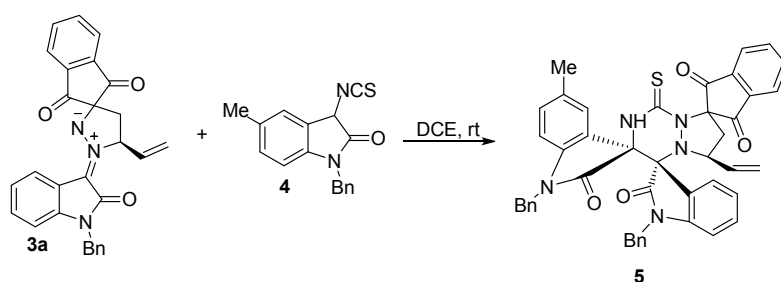

To a solution of (E)-1'-(1-benzyl-2-oxoindolin-3-ylidene)-1,3-dioxo-5'-vinyl-1,3-dihydrospiro [indene-2,3'-pyrazolidin]-1'-ium-2'-ide **3a** (1.0 equiv) and 1-benzyl-3-isothiocyanato-5-methylindolin-2-one **4** (1.5 equiv) in DCE was stirred in at room temperature for 24 hours. Then, the solvent is directly removed under reduced pressure. The crude product was purified by flash chromatography on silica gel (eluent: PE/EtOAc = 6/1) to furnish the desired product **5** as a light yellow solid.

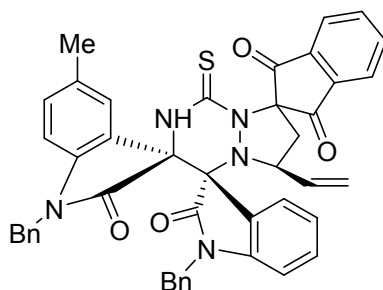

### Compound **5**

A light yellow solid, 76% yield (28 mg), 74% ee. M.p.: 301-302 °C.  $^1\text{H NMR}$  ( $\text{CDCl}_3$ , 400 MHz, TMS)  $\delta$  2.09 (s, 3H,  $\text{CH}_3$ ), 2.41 (dd,  $J = 12.0 \text{ Hz}$ ,  $12.0 \text{ Hz}$ , 2H,  $\text{CH}_2$ ), 4.01-4.14 (m, 3H,  $=\text{CH}$ ,

=CH<sub>2</sub>), 4.77 (d, *J* = 15.6 Hz, 1H, CH<sub>2</sub>), 4.79 (d, *J* = 15.2 Hz, 1H, CH<sub>2</sub>), 4.86 (d, *J* = 15.2 Hz, 1H, CH<sub>2</sub>), 4.96-5.06 (m, 2H, CH, CH<sub>2</sub>), 6.33 (s, 1H, ArH), 6.41-6.44 (m, 2H, ArH), 6.59 (dd, *J* = 7.6 Hz, 7.6 Hz, 1H, ArH), 6.89 (d, *J* = 8.0 Hz, 1H, ArH), 7.04 (dd, *J* = 7.6 Hz, 7.6 Hz, 1H, ArH), 7.14 (s, 1H, ArH), 7.21-7.36 (m, 10H, ArH), 7.81-7.84 (m, 2H, ArH), 7.96-8.00 (m, 2H, ArH). <sup>13</sup>C NMR (CDCl<sub>3</sub>, 100 MHz, TMS) δ 20.9, 39.2, 43.7, 44.3, 63.2, 63.7, 65.3, 70.7, 108.8, 109.1, 115.0, 120.8, 122.0, 123.3, 123.5, 126.2, 127.0, 127.66, 127.77, 127.84, 127.85, 128.6, 128.7, 130.6, 131.4, 132.7, 133.0, 135.0, 135.41, 135.45, 135.47, 138.5, 139.2, 141.1, 143.8, 166.3, 169.4, 171.7, 194.7, 194.9. IR (CH<sub>2</sub>Cl<sub>2</sub>) ν 2960, 2923, 2854, 1719, 1613, 1496, 1467, 1344, 1259, 1080, 1017, 866, 796, 732, 699 cm<sup>-1</sup>. HRMS (ESI) Calcd. for C<sub>45</sub>H<sub>36</sub>N<sub>5</sub>O<sub>4</sub>S<sup>+1</sup>(M+H)<sup>+</sup> requires 742.2483, found: 742.2481.

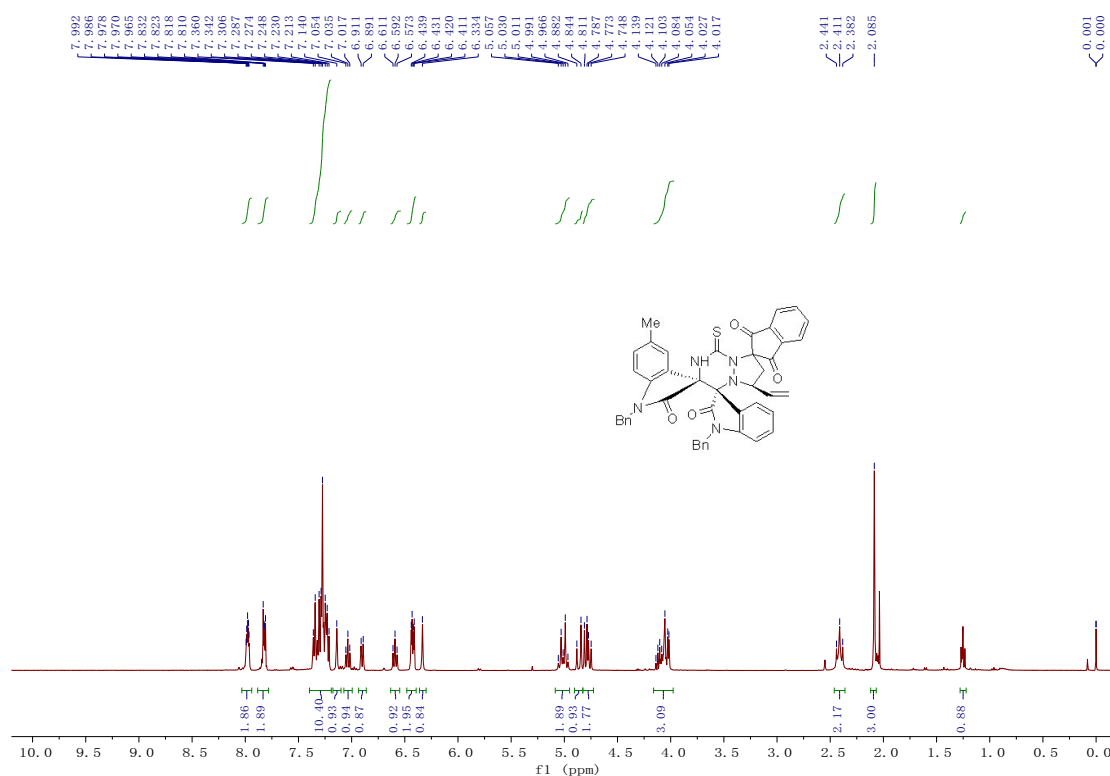



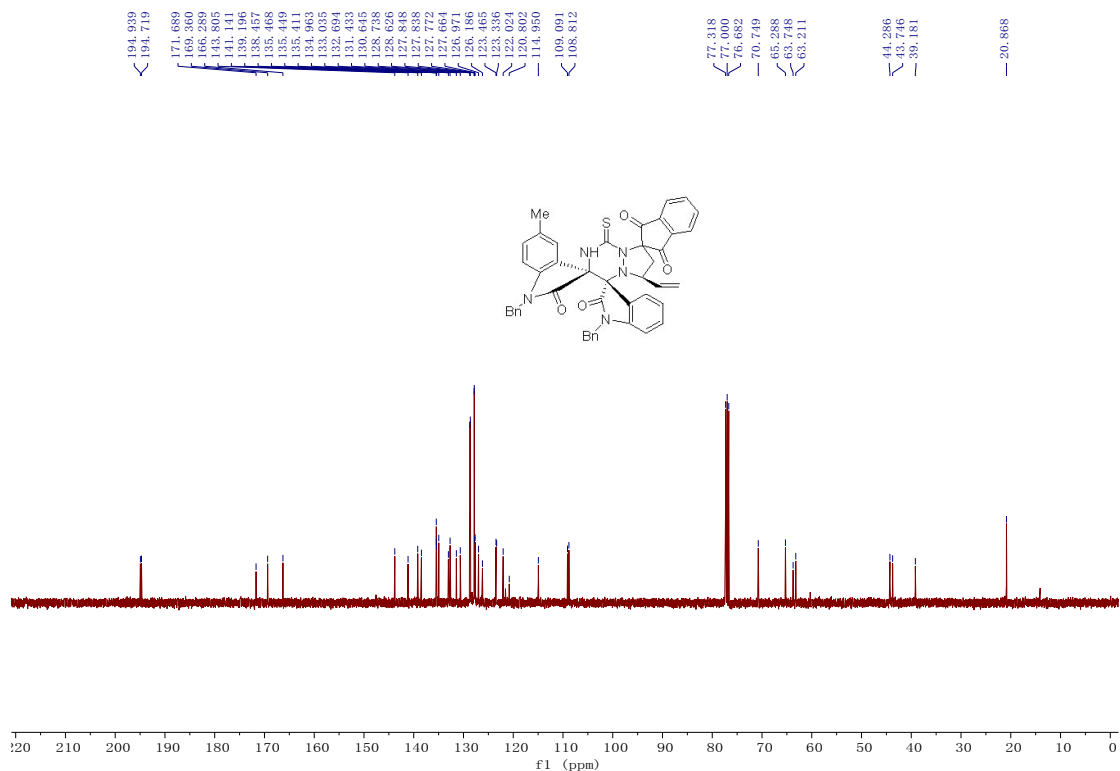

HPLC spectra:

### HPLC REPORT

Sample Name: cb-2-32-racemic  
 Column: IA  
 Velocity (mL/min): 0.7

Date: #####  
 Mobile Phase: hex/ipr = 60/40  
 Detection Wavelength (nm): 254

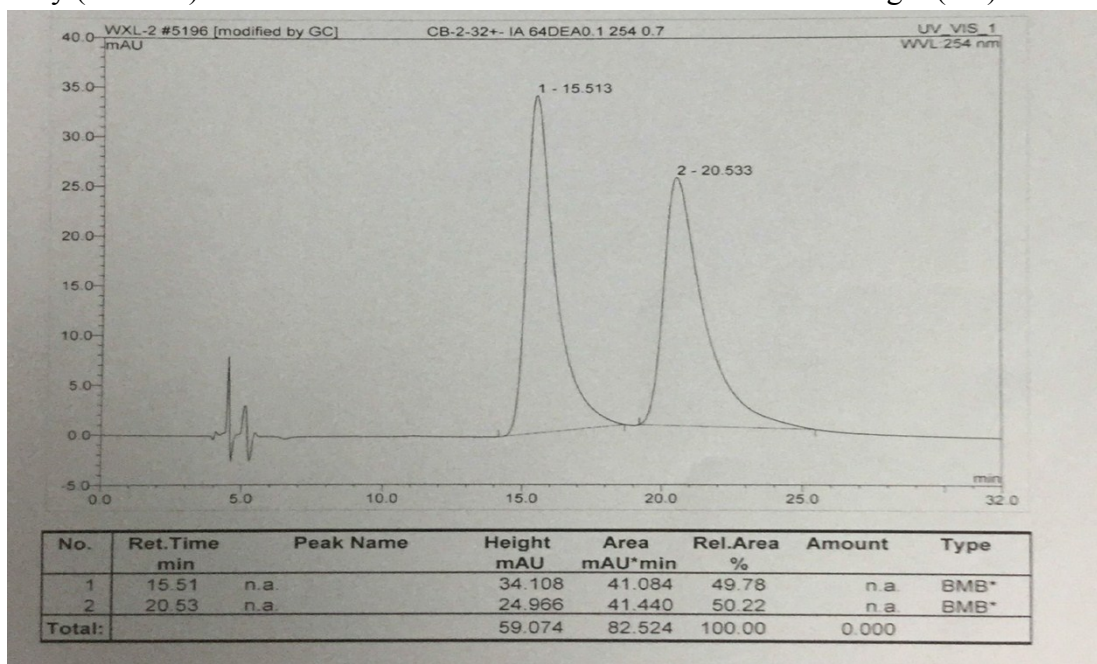

| NO | R. Time | Peak Area | Percent | Peak Height |
|----|---------|-----------|---------|-------------|
|----|---------|-----------|---------|-------------|

|   |       |        |       |        |
|---|-------|--------|-------|--------|
| 1 | 15.51 | 41.084 | 49.78 | 34.108 |
| 2 | 20.53 | 41.440 | 50.22 | 24.966 |

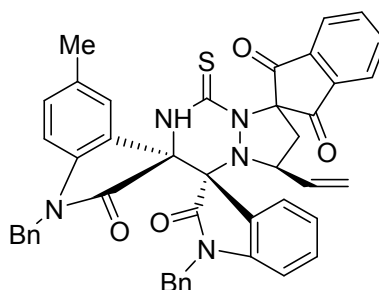

Chiral HPLC report: **3m**

### HPLC REPORT

Sample Name: cb-2-32-chiral

Date: #####

Column: IA

Mobile Phase: hex/ipr = 60/40

Velocity (mL/min): 0.7

Detection Wavelength (nm): 254

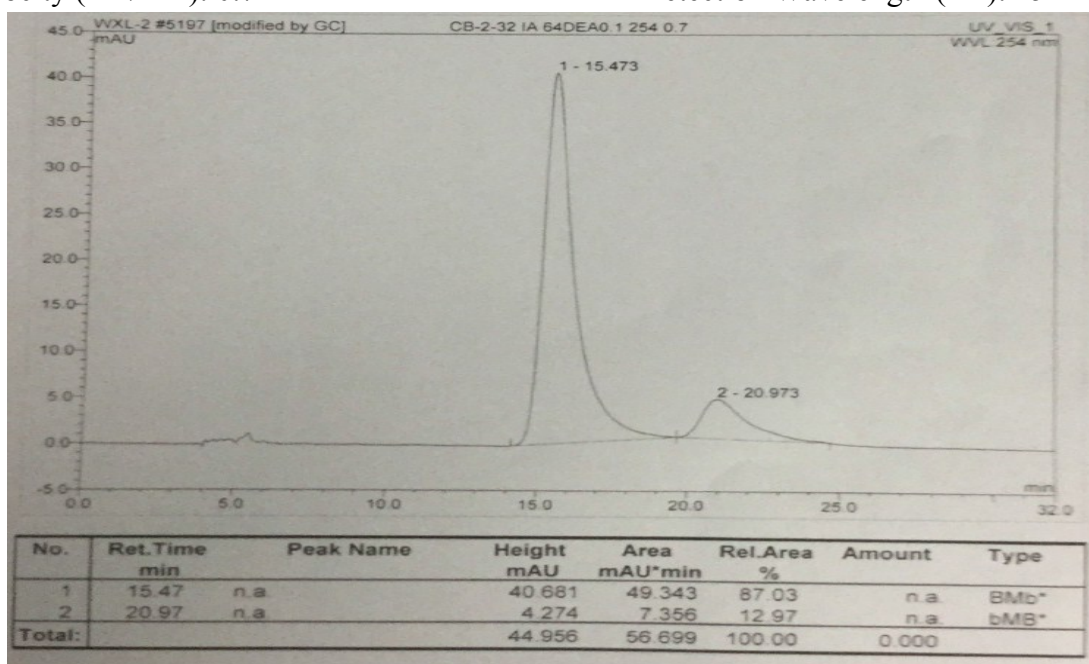

| NO | R. Time | Peak Area | Percent | Peak Height |
|----|---------|-----------|---------|-------------|
| 1  | 15.47   | 49.343    | 87.03   | 40.681      |
| 2  | 20.97   | 4.274     | 12.97   | 7.356       |

Chiral HPLC report: Enantiomeric excess was determined by HPLC with a Chiralpak IA column;  $\lambda = 254$  nm; eluent: Hexane/Isopropanol = 60/40; Flow rate: 0.7 mL/min;  $t_{\text{minor}} = 20.97$  min,  $t_{\text{major}} = 15.47$  min; ee = 74%.  $[\alpha]_{\text{D}}^{20} = 103.0$  (c = 1.00, CH<sub>2</sub>Cl<sub>2</sub>).

## 9. X-ray crystallographic information of compound **5**

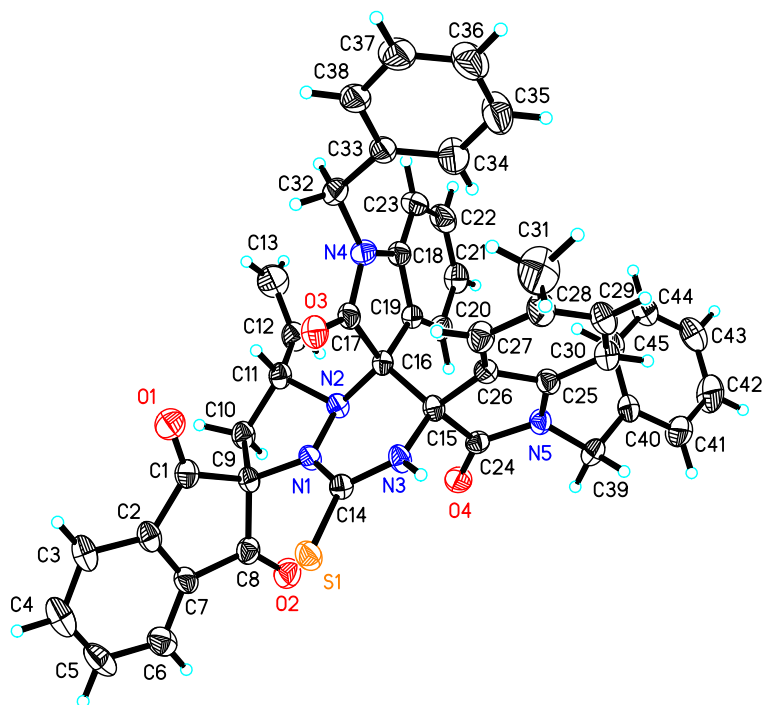

The crystal data of racemate **5** have been deposited in CCDC with number 1414548. Empirical Formula:  $C_{45}H_{35}N_5O_4S$ ; Formula Weight: 741.84; Crystal Color, Habit: colorless, Crystal Dimensions: 0.180 x 0.150 x 0.110 mm<sup>3</sup>; Crystal System: Monoclinic; Lattice Parameters:  $a = 21.457(3)\text{\AA}$ ,  $b = 17.435(3)\text{\AA}$ ,  $c = 22.102(3)\text{\AA}$ ,  $\alpha = 90^\circ$ ,  $\beta = 101.295(3)^\circ$ ,  $\gamma = 90^\circ$ ,  $V = 8108(2)\text{\AA}^3$ ; Space group: C 2/c;  $Z = 8$ ;  $D_{calc} = 1.215\text{ g/cm}^3$ ;  $F_{000} = 3104$ ; Final R indices [ $I > 2\sigma(I)$ ]  $R1 = 0.0540$ ,  $wR2 = 0.1059$ .

## 10. Experimental and results Vibrational Circular Dichroism (VCD) of products 5.

### VCD and IR experimental

VCD and IR spectra were measured using a BioTools ChiralIR-2X FT-VCD spectrometer, equipped with a single photoelastic modulation and a mercury cadmium tellurium detector. About 5 mg of compound **5** was dissolved in 150  $\mu\text{L}$   $\text{CDCl}_3$  and placed in a  $\text{BaF}_2$  cell with a pathlength of 75  $\mu\text{m}$ . Data were acquired at a resolution of 4  $\text{cm}^{-1}$  for 8 h. Besides the chiral sample, the corresponding racemate was measured under the same conditions to obtain VCD baseline.

### VCD and IR calculations

The assignment of absolute configuration with VCD method is based on comparisons of the experimental spectra with the theoretical curve obtained by density functional theory (DFT) calculations. Molecular model of (*R,R,R*)-**5** was built and subjected to a conformational analysis using the Monte Carlo protocol at the molecular mechanic force field MMFF94 level with Compute VOA (BioTools Inc., Jupiter, FL). Within a 5 kcal/mol window, 26 energetically distinct conformers were predicted. Geometry optimization and frequencies calculation of the conformers were then carried out using the B3LYP hybrid density functional and 6-31G (d) basis set with Gaussian 09 (Gaussian Inc., Wallingford, CT). Boltzmann-population-weighted composite VCD and IR spectra were then generated by Compute VOA. Theoretical curves for (*S,S,S*)-**5** were deduced from (*R,R,R*)-**5**. As enantiomers, their IR curves are exactly the same and VCD spectra are mirror images.

**Figure SI-1** and **Figure SI-2** show the experimental and calculated VCD and IR spectra over the range of 1100-1900  $\text{cm}^{-1}$ . A scale factor of 0.96 has been applied to the calculated frequencies to overcome a systematic overestimation of the molecular force constant values by DFT. The good agreement between the corresponding spectra of compound **5** and (*S,S,S*)-**5**, leads to an unambiguous assignment of its absolute configuration as (*S,S,S*).

Quantitative evaluation of this assignment was achieved by Compare VOA (BioTools Inc., Jupiter, FL). The related results, including the spectral similarities and enantiomeric similarity index (the difference between the VCD spectral similarity of the correct and the incorrect enantiomers, ESI) are listed in **Table SI-2**. Based on the current Compare VOA database, the

confidence level of the (*S,S,S*) assignment for compound **5** is 97%.

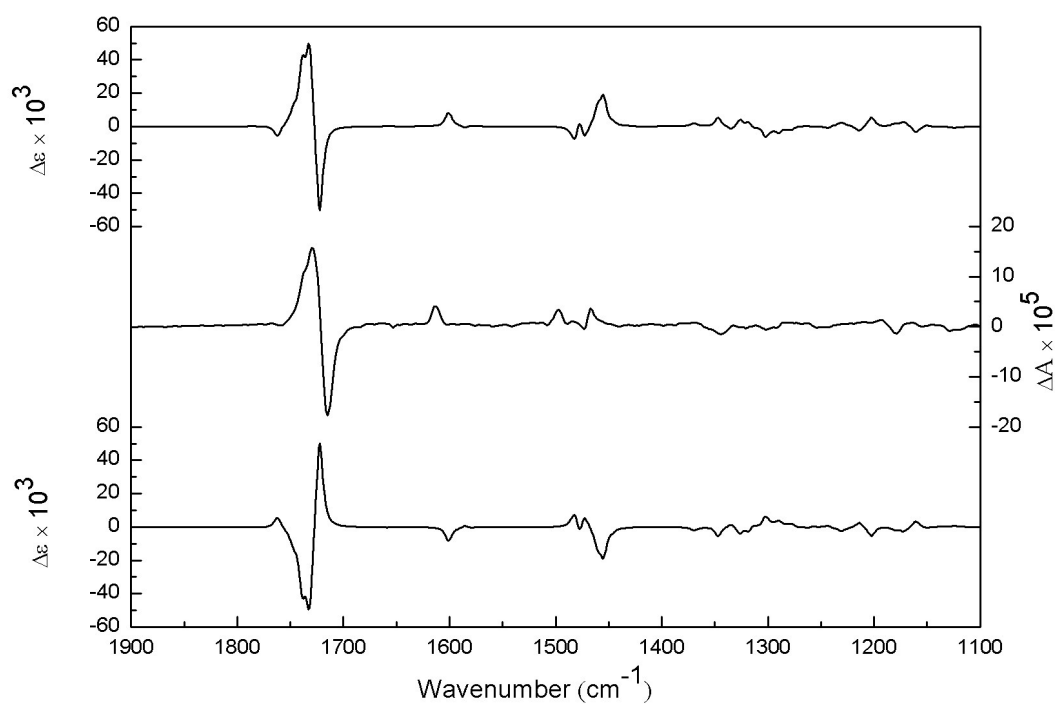

**Figure SI-1.** Comparison of the experimental VCD spectrum of compound **5** (center) and the calculated VCD spectra of (*S,S,S*)-**5** (top) and (*R,R,R*)-**5** (bottom)

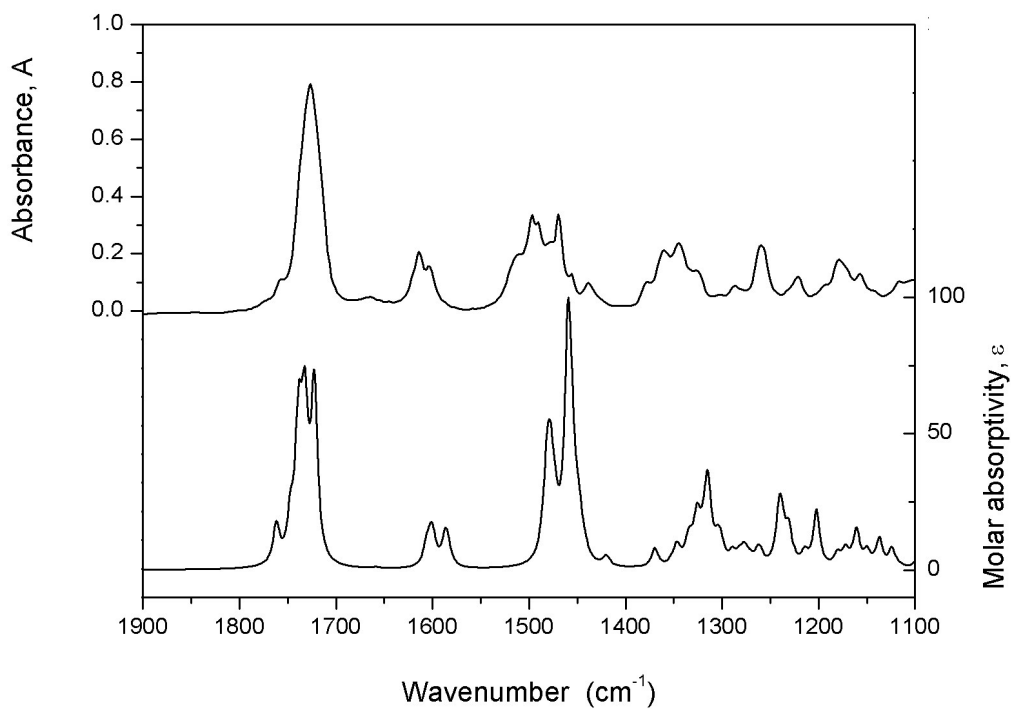

**Figure SI-2.** Comparison of the experimental IR spectrum of compound **5** (top) and the calculated

IR spectra for (S,S,S)-**5** and (R,R,R)-**5** (bottom)

**Table SI-2.** Evaluations for the AC assignment of compound **5**

| Calculation Method  | <sup>a</sup> $S_{IR}$ | <sup>b</sup> $S_E$ | <sup>c</sup> $S_{,-E}$ | <sup>d</sup> $ESI$ |
|---------------------|-----------------------|--------------------|------------------------|--------------------|
| DFT//B3LYP/6-31G(d) | 77.8                  | 72.0               | 15.6                   | 56.4               |

<sup>a</sup> Total neighborhood similarity for IR spectra

<sup>b</sup> VCD spectral neighborhood similarity for the correct enantiomer

<sup>c</sup> VCD spectral neighborhood similarity for the incorrect enantiomer

<sup>d</sup> Enantiomeric similarity index

## 11. References

- [1] (a) L.-Y. Mei, Z.-L. Yuan, M. Shi, *Organometallics* **2011**, *30*, 6466. (b) L.-Y. Mei, Y. Wei, Q. Xu, M. Shi, *Organometallics* **2012**, *31*, 7591. (c) H.-P. Deng, Y. Wei, M. Shi, *Adv. Synth. Catal.* **2009**, *351*, 2897. (d) Z.-L. Yuan, Z.-Y. Lei, M. Shi, *Tetrahedron: Asymmetry*, **2008**, *19*, 1339.
- [2] F. Wei, C.-L. Ren, D. Wang, L. Liu, *Chem. Eur. J.* **2015**, *21*, 2335.
- [3] a) Z.-Y. Cao, F. Zhou, Y.-H. Yu, J. Zhou, *Org. Lett.* **2012**, *15*, 42-45; b) L.-Y. Mei, X.-Y. Tang, M. Shi, *Org. Biomol. Chem.* **2014**, *12*, 1149-1156.
